# Supplementary material for: Potentials and Integrated Suitability Pre-assessment of Wastewater Treatment Plants as Local Energy Cells
Source: Frontiers journal article supplement (doi:10.3389/fenvs.2021.785557), 2022-02-21
Supplement: Data_Sheet_1.xlsx [file Data_Sheet_1.xlsx]

## Sheet: WWTPs inventory
rptMStateKey	uwwNuts	aggCode	uwwCode	uwwName	uwwLatitude	uwwLongitude	uwwCapacity	uwwLoadEntering	anaerobic digestion [y/n]	inflow [m³/h]	digester gas [m³/d]	digester gas el. [MWh/a]	digester gas th. [MWh/a]	heat recovery potential [kW]	heat pump [MWh/a]	NUTS_ID	spatial context
AT	AT113	ATAG_1-00000036	ATTP_1-00000036	Mischendorf	47.1862	16.3465	5000	3931	NO	24.5687	0	0	0	142.499	854.992	AT11	B
AT	AT112	ATAG_1-W1	ATTP_1-W1	Wimpassing/Leitha	47.926	16.437	5000	3112	NO	19.45	0	0	0	112.81	676.86	AT11	A
AT	AT125	ATAG_3-728	ATTP_3-728	ARA GAV Gmoosbach	48.5995	16.086	14240	7648	NO	47.8	0	0	0	277.24	1663.44	AT12	C
AT	AT127	ATAG_3-92	ATTP_3-92	ARA AV Raum Hainburg	48.1444	16.9277	15000	9160	NO	57.25	0	0	0	332.05	1992.3	AT12	A
AT	AT124	ATAG_3-848	ATTP_3-848	ARA GAV Eggenburg - Röschitz	48.6589	15.9045	15000	13503	NO	84.3937	0	0	0	489.484	2936.9	AT12	C
AT	AT126	ATAG_3-106	ATTP_3-106	ARA GAV Wagram - West	48.3995	15.8004	15000	11863	NO	74.1437	0	0	0	430.034	2580.2	AT12	B
AT	AT127	ATAG_3-398	ATTP_3-398	ARA Gumpoldskirchen	48.0346	16.2933	15000	8128	NO	50.8	0	0	0	294.64	1767.84	AT12	A
AT	AT121	ATAG_3-187	ATTP_3-187	ARA St. Valentin	48.1806	14.537	15000	9231	YES	57.6938	184.62	138.465	276.93	334.624	2007.74	AT12	B
AT	AT123	ATAG_3-145	ATTP_3-145	ARA AV Oberes Perschlingtal	48.2384	15.7559	15300	12596	NO	78.725	0	0	0	456.605	2739.63	AT12	C
AT	AT122	ATAG_3-713	ATTP_3-713	ARA GAV Aspang - Feistritz	47.593	16.1105	16000	8664	NO	54.15	0	0	0	314.07	1884.42	AT12	C
AT	AT124	ATAG_3-1127	ATTP_3-1127	ARA Abwasserreinigung im Waldviertel GmbH	48.8196	15.2961	16700	9597	NO	59.9812	0	0	0	347.891	2087.35	AT12	A
AT	AT121	ATAG_3-7	ATTP_3-7	ARA GV Abwasserreinigung im südlichen Waldviertel	48.2191	15.2346	16800	6753	NO	42.2063	0	0	0	244.796	1468.78	AT12	A
AT	AT126	ATAG_3-810	ATTP_3-810	ARA GAV Wagram - Nördliches Tullnerfeld	48.3807	15.8804	17000	11225	NO	70.1562	0	0	0	406.906	2441.44	AT12	C
AT	AT122	ATAG_3-369	ATTP_3-369	ARA AV Gölsental	48.0528	15.6327	18000	19121	NO	119.506	0	0	0	693.136	4158.82	AT12	A
AT	AT121	ATAG_3-124	ATTP_3-124	ARA GAV Oberes Urltal	48.0581	14.7055	18000	13950	YES	87.1875	279	209.25	418.5	505.687	3034.12	AT12	C
AT	AT121	ATAG_3-425	ATTP_3-425	ARA GAV Erlauftal	48.0884	15.1435	19000	12142	NO	75.8875	0	0	0	440.147	2640.88	AT12	C
AT	AT125	ATAG_3-159	ATTP_3-159	ARA Poysdorf	48.6522	16.6865	19800	8191	NO	51.1938	0	0	0	296.924	1781.54	AT12	B
AT	AT121	ATAG_3-6	ATTP_3-6	ARA AV Ybbsfeld	48.1691	15.0913	20000	19860	NO	124.125	0	0	0	719.925	4319.55	AT12	A
AT	AT126	ATAG_3-105	ATTP_3-105	ARA GAV Raum St. Andrä-Wördern	48.3408	16.216	20000	6413	NO	40.0813	0	0	0	232.471	1394.83	AT12	A
AT	AT127	ATAG_3-49	ATTP_3-49	ARA Himberg	48.0917	16.4403	20000	7884	NO	49.275	0	0	0	285.795	1714.77	AT12	A
AT	AT127	ATAG_3-404	ATTP_3-404	ARA Vösendorf	48.1176	16.3591	20000	13971	NO	87.3188	0	0	0	506.449	3038.69	AT12	B
AT	AT127	ATAG_3-36	ATTP_3-36	ARA Ebreichsdorf	47.9723	16.4138	20000	9740	NO	60.875	0	0	0	353.075	2118.45	AT12	A
AT	AT125	ATAG_3-1050	ATTP_3-1050	ARA GAV Laaer Becken	48.7315	16.3915	20800	15251	NO	95.3188	0	0	0	552.849	3317.09	AT12	A
AT	AT126	ATAG_3-55	ATTP_3-55	ARA Wiental - Sammelkanal GmbH	48.185	16.123	23000	17008	YES	106.3	340.16	255.12	510.24	616.54	3699.24	AT12	A
AT	AT121	ATAG_3-51	ATTP_3-51	ARA GV Abwasserbeseitigung Raum Pöchlarn	48.2148	15.2625	25000	13460	YES	84.125	269.2	201.9	403.8	487.925	2927.55	AT12	C
AT	AT125	ATAG_3-764	ATTP_3-764	ARA Mistelbach	48.5704	16.6105	25000	16341	NO	102.131	0	0	0	592.361	3554.17	AT12	C
AT	AT127	ATAG_3-1022	ATTP_3-1022	ARA Guntramsdorf	48.042	16.3332	27000	14732	NO	92.075	0	0	0	534.035	3204.21	AT12	B
AT	AT125	ATAG_3-10	ATTP_3-10	ARA Hollabrunn	48.5484	16.073	30000	16810	YES	105.062	336.2	252.15	504.3	609.362	3656.17	AT12	A
AT	AT126	ATAG_3-150	ATTP_3-150	ARA Stockerau	48.3842	16.2297	30000	20196	YES	126.225	403.92	302.94	605.88	732.105	4392.63	AT12	A
AT	AT121	ATAG_3-130	ATTP_3-130	ARA Waidhofen an der Ybbs	47.9715	14.7596	31000	9810	YES	61.3125	196.2	147.15	294.3	355.612	2133.67	AT12	A
AT	AT122	ATAG_3-450	ATTP_3-450	ARA GV Abwasserbeseitigung Raum Hohe Wand - Steinfeld	47.8229	16.1843	32000	13312	NO	83.2	0	0	0	482.56	2895.36	AT12	B
AT	AT127	ATAG_3-38	ATTP_3-38	ARA Traiskirchen	48.0311	16.3095	33000	19325	NO	120.781	0	0	0	700.531	4203.19	AT12	A
AT	AT125	ATAG_3-347	ATTP_3-347	ARA GAV Haugsdorf-Pernersdorf	48.7059	16.0858	12000	1207	NO	7.54375	0	0	0	43.7537	262.522	AT12	B
AT	AT127	ATAG_3-396	ATTP_3-396	ARA AV Breitenfurt - Laab	48.1365	16.2113	12000	5082	NO	31.7625	0	0	0	184.223	1105.34	AT12	A
AT	AT126	ATAG_3-121	ATTP_3-121	ARA Deutsch-Wagram	48.2932	16.5575	12000	13379	NO	83.6188	0	0	0	484.989	2909.93	AT12	A
AT	AT126	ATAG_3-772	ATTP_3-772	ARA GAV Oberer Weidenbach	48.4381	16.6069	13000	5547	NO	34.6688	0	0	0	201.079	1206.47	AT12	C
AT	AT125	ATAG_3-81	ATTP_3-81	ARA Retz	48.7545	15.9657	13477	9369	NO	58.5563	0	0	0	339.626	2037.76	AT12	A
AT	AT126	ATAG_3-152	ATTP_3-152	ARA GAV Mittleres Rußbachtal	48.3941	16.4989	13500	6507	NO	40.6688	0	0	0	235.879	1415.27	AT12	B
AT	AT126	ATAG_3-729	ATTP_3-729	ARA GAV Mittlerer Weidenbach	48.3647	16.7121	14000	7322	NO	45.7625	0	0	0	265.422	1592.53	AT12	B
AT	AT126	ATAG_3-731	ATTP_3-731	ARA GAV Mittleres Schmidatal	48.4422	15.9904	14000	7564	NO	47.275	0	0	0	274.195	1645.17	AT12	B
AT	AT127	ATAG_3-25	ATTP_3-25	ARA GAV Ebenfurth-Pottendorf	47.9111	16.4011	8500	12038	NO	75.2375	0	0	0	436.377	2618.26	AT12	A
AT	AT126	ATAG_3-707	ATTP_3-707	ARA Angern an der March	48.363	16.8314	8500	2393	NO	14.9562	0	0	0	86.7462	520.477	AT12	C
AT	AT126	ATAG_3-828	ATTP_3-828	ARA GAV Sierndorf - Göllersdorf	48.4203	16.1678	9000	10712	NO	66.95	0	0	0	388.31	2329.86	AT12	A
AT	AT125	ATAG_3-244	ATTP_3-244	ARA GAV Unteres Zayatal	48.5898	16.8315	9000	5730	NO	35.8125	0	0	0	207.712	1246.27	AT12	B
AT	AT125	ATAG_3-72	ATTP_3-72	ARA Zistersdorf	48.5472	16.7804	9000	5487	NO	34.2938	0	0	0	198.904	1193.42	AT12	A
AT	AT127	ATAG_3-2	ATTP_3-2	ARA GAV Fischatal	48.0244	16.5009	9200	3809	NO	23.8063	0	0	0	138.076	828.457	AT12	A
AT	AT125	ATAG_3-255	ATTP_3-255	ARA Sitzendorf an der Schmida	48.5681	15.9321	9200	6047	NO	37.7938	0	0	0	219.204	1315.22	AT12	A
AT	AT341	ATAG_8-Damuels	ATTP_8-Damuels	Damüls	47.2807	9.89479	5000	2871	NO	17.9438	0	0	0	104.074	624.442	AT34	B
AT	AT341	ATAG_8-Warth	ATTP_8-Warth	Warth	47.2605	10.19	5000	1770	NO	11.0625	0	0	0	64.1625	384.975	AT33	C
AT	AT341	ATAG_8-Boedmen	ATTP_8-Boedmen	Bödmen	47.3156	10.1522	6225	2731	YES	17.0688	54.62	40.965	81.93	98.9988	593.992	AT34	B
AT	AT342	ATAG_8-Alberschwende	ATTP_8-Alberschwende	Alberschwende	47.4491	9.81174	9200	3482	NO	21.7625	0	0	0	126.222	757.335	AT34	A
AT	AT342	ATAG_8-Rotachtal	ATTP_8-Rotachtal	Rotachtal	47.5143	9.8616	16400	9044	NO	56.525	0	0	0	327.845	1967.07	AT34	C
AT	AT341	ATAG_8-Riezlern	ATTP_8-Riezlern	Riezlern	47.3582	10.1804	22200	8550	YES	53.4375	171	128.25	256.5	309.938	1859.62	AT34	A
AT	AT342	ATAG_8-Vorderland	ATTP_8-Vorderland	Vorderland	47.3087	9.61742	27000	16471	YES	102.944	329.42	247.065	494.13	597.074	3582.44	AT34	A
AT	AT125	ATAG_3-733	ATTP_3-733	ARA GAV Taschlbach	48.5403	16.5104	14000	4054	NO	25.3375	0	0	0	146.958	881.745	AT12	B
AT	AT126	ATAG_3-77	ATTP_3-77	ARA Gänserndorf	48.3468	16.735	14000	9132	NO	57.075	0	0	0	331.035	1986.21	AT12	A
AT	AT121	ATAG_3-3	ATTP_3-3	ARA Melk	48.235	15.335	14000	6205	YES	38.7812	124.1	93.075	186.15	224.931	1349.59	AT12	B
AT	AT126	ATAG_3-120	ATTP_3-120	ARA GAV Wolkersdorf - Pillichsdorf - Großengersdorf	48.3581	16.5579	35000	19811	NO	123.819	0	0	0	718.149	4308.89	AT12	A
AT	AT126	ATAG_3-430	ATTP_3-430	ARA Tulln	48.3339	16.0734	37000	29585	YES	184.906	591.7	443.775	887.55	1072.46	6434.74	AT12	B
AT	AT122	ATAG_3-182	ATTP_3-182	ARA AV Oberes Schwarzatal	47.6753	15.9608	40000	25420	YES	158.875	508.4	381.3	762.6	921.475	5528.85	AT12	A
AT	AT126	ATAG_3-132	ATTP_3-132	ARA AV Raum Korneuburg	48.3324	16.332	40000	37259	YES	232.869	745.18	558.885	1117.77	1350.64	8103.83	AT12	A
AT	AT127	ATAG_3-43	ATTP_3-43	ARA GAV Trumau-Schönau	48.0055	16.3542	40000	27623	NO	172.644	0	0	0	1001.33	6008	AT12	A
AT	AT122	ATAG_3-448	ATTP_3-448	ARA Piestingtaler AV	47.9049	16.2624	60000	45395	NO	283.719	0	0	0	1645.57	9873.41	AT12	B
AT	AT121	ATAG_3-108	ATTP_3-108	ARA GAV Wieselburg	48.1383	15.1534	64500	25461	YES	159.131	509.22	381.915	763.83	922.961	5537.77	AT12	A
AT	AT124	ATAG_3-851	ATTP_3-851	ARA GAV Langenlois - Schönberg am Kamp	48.4693	15.7022	70000	35759	NO	223.494	0	0	0	1296.26	7777.58	AT12	A
AT	AT127	ATAG_3-34	ATTP_3-34	ARA GV Abwasserbeseitigung Raum Bad Vöslau	47.969	16.2424	105000	90558	YES	565.988	1811.16	1358.37	2716.74	3282.73	19696.4	AT12	A
AT	AT122	ATAG_3-447	ATTP_3-447	ARA AV Oberes Piestingtal	47.8909	15.984	109683	40092	YES	250.575	801.84	601.38	1202.76	1453.33	8720.01	AT12	A
AT	AT127	ATAG_3-403	ATTP_3-403	ARA Mödling	48.0962	16.3302	130000	63708	NO	398.175	0	0	0	2309.41	13856.5	AT12	B
AT	AT127	ATAG_3-643	ATTP_3-643	ARA AV Großraum Bruck an der Leitha - Neusiedl am See	48.0308	16.8261	140500	82598	YES	516.238	1651.96	1238.97	2477.94	2994.18	17965.1	AT12	C
AT	AT126	ATAG_3-142	ATTP_3-142	ARA Groß-Enzersdorf	48.1788	16.5466	144000	130283	YES	814.269	2605.66	1954.24	3908.49	4722.76	28336.6	AT12	B
AT	AT121	ATAG_3-104	ATTP_3-104	ARA GAV Amstetten	48.1086	14.8963	150000	139070	YES	869.188	2781.4	2086.05	4172.1	5041.29	30247.7	AT12	B
AT	AT124	ATAG_3-119	ATTP_3-119	ARA GAV Raum Krems an der Donau	48.4007	15.6629	255000	109717	YES	685.731	2194.34	1645.76	3291.51	3977.24	23863.4	AT12	A
AT	AT122	ATAG_3-449	ATTP_3-449	ARA AWV Wr. Neustadt-Süd	47.8335	16.2756	260000	201059	YES	1256.62	4021.18	3015.89	6031.77	7288.39	43730.3	AT12	A
AT	AT123	ATAG_3-47	ATTP_3-47	ARA AV An der Traisen	48.3632	15.7644	280000	225115	YES	1406.97	4502.3	3376.72	6753.45	8160.42	48962.5	AT12	C
AT	AT127	ATAG_3-11	ATTP_3-11	ARA AWV Schwechat	48.1346	16.5412	370000	162228	YES	1013.93	3244.56	2433.42	4866.84	5880.77	35284.6	AT12	C
AT	AT126	ATAG_3-433	ATTP_3-433	ARA GAV Südöstliches Tullnerfeld	48.2904	15.9993	34000	42798	YES	267.488	855.96	641.97	1283.94	1551.43	9308.56	AT12	B
AT	AT123	ATAG_3-162	ATTP_3-162	ARA AV Pielachtal	48.2119	15.4984	35000	49351	YES	308.444	987.02	740.265	1480.53	1788.97	10733.8	AT12	C
AT	AT113	ATAG_1-00000055	ATTP_1-00000055	Rechnitz	47.3015	16.4534	6000	3884	NO	24.275	0	0	0	140.795	844.77	AT11	A
AT	AT113	ATAG_1-00000103	ATTP_1-00000103	Burg (Tauchental)	47.2046	16.4132	7000	3179	NO	19.8688	0	0	0	115.239	691.433	AT11	C
AT	AT112	ATAG_1-00000112	ATTP_1-00000112	Halbturn	47.8558	17.001	7000	1894	NO	11.8375	0	0	0	68.6575	411.945	AT11	C
AT	AT112	ATAG_1-00000013	ATTP_1-00000013	Frauenkirchen	47.8269	16.9226	7250	3911	NO	24.4437	0	0	0	141.774	850.642	AT11	B
AT	AT112	ATAG_1-00000001	ATTP_1-00000001	Andau	47.7787	17.0491	8000	4201	NO	26.2562	0	0	0	152.286	913.717	AT11	B
AT	AT112	ATAG_1-00000027	ATTP_1-00000027	Jois	47.9491	16.7938	8400	5481	NO	34.2563	0	0	0	198.686	1192.12	AT11	B
AT	AT124	ATAG_3-330	ATTP_3-330	ARA GV Horn für Abwasserbeseitigung	48.6615	15.6669	40000	19411	YES	121.319	388.22	291.165	582.33	703.649	4221.89	AT12	B
AT	AT124	ATAG_3-458	ATTP_3-458	ARA Zwettl	48.6127	15.1846	40000	21350	YES	133.438	427	320.25	640.5	773.938	4643.62	AT12	C
AT	AT122	ATAG_3-421	ATTP_3-421	ARA AV Mittleres Schwarzatal	47.7185	16.0468	41000	31620	NO	197.625	0	0	0	1146.22	6877.35	AT12	A
AT	AT126	ATAG_3-134	ATTP_3-134	ARA GAV Marchfeld	48.2591	16.653	42000	23535	NO	147.094	0	0	0	853.144	5118.86	AT12	C
AT	AT127	ATAG_3-29	ATTP_3-29	ARA Baden	47.9947	16.264	45000	30598	YES	191.237	611.96	458.97	917.94	1109.18	6655.06	AT12	A
AT	AT123	ATAG_3-52	ATTP_3-52	ARA AV Anzbach-Laabental	48.223	15.9212	47000	33254	YES	207.838	665.08	498.81	997.62	1205.46	7232.74	AT12	A
AT	AT124	ATAG_3-757	ATTP_3-757	ARA AV Lainsitz	48.7956	14.9574	50000	26859	YES	167.869	537.18	402.885	805.77	973.639	5841.83	AT12	C
AT	AT126	ATAG_3-32	ATTP_3-32	ARA Klosterneuburg	48.2942	16.34	55000	32281	YES	201.756	645.62	484.215	968.43	1170.19	7021.12	AT12	A
AT	AT113	ATAG_1-00000097	ATTP_1-00000097	Neumarkt (Tauchental)	47.2841	16.2981	10000	6939	NO	43.3687	0	0	0	251.539	1509.23	AT11	C
AT	AT113	ATAG_1-00000064	ATTP_1-00000064	Bocksdorf (Oberes Stremtal)	47.1382	16.1831	12500	28085	NO	175.531	0	0	0	1018.08	6108.49	AT11	B
AT	AT112	ATAG_1-00000078	ATTP_1-00000078	Nickelsdorf (Nickelsdorf - Zurndorf)	47.9448	17.0894	12500	6035	NO	37.7188	0	0	0	218.769	1312.61	AT11	C
AT	AT113	ATAG_1-00000081	ATTP_1-00000081	Wolfau (Stögersbachtal)	47.2535	16.0918	14500	11207	NO	70.0438	0	0	0	406.254	2437.52	AT11	B
AT	AT111	ATAG_1-00000030	ATTP_1-00000030	Klostermarienberg (Lockenhaus) Günstal	47.4243	16.5804	15200	12078	NO	75.4875	0	0	0	437.827	2626.96	AT11	C
AT	AT112	ATAG_1-00000051	ATTP_1-00000051	Podersdorf	47.8637	16.8392	20000	3181	NO	19.8813	0	0	0	115.311	691.867	AT11	A
AT	AT111	ATAG_1-00000044	ATTP_1-00000044	Oberpullendorf (Mittleres Burgenland) Stooberbachtal	47.4888	16.5274	25000	20089	YES	125.556	401.78	301.335	602.67	728.226	4369.36	AT11	A
AT	AT113	ATAG_1-00000050	ATTP_1-00000050	Riedlingsdorf (Oberes Pinkatal)	47.3287	16.1486	25500	15577	NO	97.3563	0	0	0	564.666	3388	AT11	C
AT	AT112	ATAG_1-00000077	ATTP_1-00000077	Pamhagen (Seewinkel)	47.7204	16.8732	26300	18560	NO	116	0	0	0	672.8	4036.8	AT11	C
AT	AT122	ATAG_1-00000040	ATTP_1-00000040	Neufeld (Neufelderseengebiet)	47.8816	16.3838	28700	15942	NO	99.6375	0	0	0	577.898	3467.39	AT12	B
AT	AT113	ATAG_1-00000079	ATTP_1-00000079	Glasing (Mittleres Strem- und Zickenbachtal)	47.0478	16.3651	35000	25790	NO	161.188	0	0	0	934.887	5609.32	AT11	C
AT	AT112	ATAG_1-00000016	ATTP_1-00000016	Gols (Gols - Mönchhof)	47.8857	16.92	40000	17734	NO	110.837	0	0	0	642.857	3857.14	AT11	A
AT	AT113	ATAG_1-00000057	ATTP_1-00000057	Siget / Wart (Mittleres Pinka- und Zickenbachtal)	47.2537	16.2784	45000	52420	YES	327.625	1048.4	786.3	1572.6	1900.22	11401.3	AT11	B
AT	AT112	ATAG_1-00000010	ATTP_1-00000010	Eisenstadt (Eisbachtal)	47.8311	16.5422	54000	33107	NO	206.919	0	0	0	1200.13	7200.77	AT11	A
AT	AT111	ATAG_1-00000005	ATTP_1-00000005	Deutschkreuz (Mittleres Burgenland) Goldbachtal	47.5945	16.6406	65000	16679	NO	104.244	0	0	0	604.614	3627.68	AT11	A
AT	AT112	ATAG_1-00000145	ATTP_1-00000145	Schützen (Neusiedlersee-Westufer)	47.8581	16.6482	66500	21095	NO	131.844	0	0	0	764.694	4588.16	AT11	C
AT	AT112	ATAG_1-00000074	ATTP_1-00000074	Wulkaprodersdorf (Wulkatal)	47.8006	16.5173	110000	73447	NO	459.044	0	0	0	2662.45	15974.7	AT11	B
AT	AT113	ATAG_1-00000133	ATTP_1-00000133	Heiligenkreuz/Lafnitztal (Bez.Jennersdorf) Lafnitztal-Raabtal	46.9659	16.2582	130000	45970	YES	287.312	919.4	689.55	1379.1	1666.41	9998.47	AT11	A
AT	AT211	ATAG_2-K1843518R0	ATTP_2-K1843518R0	ABUG-Abwasserbeseitigung Unteres Gailtal Errichtungs- und Betriebsgesellschaft	46.5813	13.6193	6425	3870	NO	24.1875	0	0	0	140.287	841.725	AT21	A
AT	AT211	ATAG_2-K1933909	ATTP_2-K1933909	Gemeinde Poggersdorf	46.6421	14.4265	6500	4708	NO	29.425	0	0	0	170.665	1023.99	AT21	B
AT	AT212	ATAG_2-K1543752R0	ATTP_2-K1543752R0	ABKM ABKM-Abwasserbeseitigung Kötschach-Mauthen Errichtung und Betriebsgesellschaft	46.6699	13.0154	7000	4904	NO	30.65	0	0	0	177.77	1066.62	AT21	B
AT	AT211	ATAG_2-K1669675R0	ATTP_2-K1669675R0	Gemeinde Ferndorf	46.7231	13.6388	7000	4814	NO	30.0875	0	0	0	174.507	1047.04	AT21	B
AT	AT212	ATAG_2-K2391503	ATTP_2-K2391503	Gemeinde Dellach/Gemeinde Berg	46.7383	13.0994	7800	4366	NO	27.2875	0	0	0	158.267	949.605	AT21	B
AT	AT213	ATAG_2-K1702958R0	ATTP_2-K1702958R0	Abwasserverband "Oberes Lavanttal"	46.9328	14.8292	8000	7767	NO	48.5437	0	0	0	281.554	1689.32	AT21	A
AT	AT212	ATAG_2-K1639918R0	ATTP_2-K1639918R0	Gemeinde Heiligenblut	47.0154	12.8667	8250	1741	NO	10.8812	0	0	0	63.1112	378.667	AT21	C
AT	AT213	ATAG_2-K2307771	ATTP_2-K2307771	WV Abwasserverband Görtschitztal	46.7382	14.5334	9000	7854	NO	49.0875	0	0	0	284.708	1708.25	AT21	A
AT	AT211	ATAG_2-K1950736	ATTP_2-K1950736	Stadtgemeinde Ferlach	46.5425	14.3046	10000	8546	NO	53.4125	0	0	0	309.793	1858.76	AT21	B
AT	AT213	ATAG_2-K1610676R0	ATTP_2-K1610676R0	Reinhalteverband für das Gebiet St. Veit/Glan	46.74	14.3853	65000	58477	NO	365.481	0	0	0	2119.79	12718.7	AT21	C
AT	AT213	ATAG_2-K1702940R0	ATTP_2-K1702940R0	Reinhalteverband "Mittleres Lavanttal"	46.7368	14.846	120000	111264	NO	695.4	0	0	0	4033.32	24199.9	AT21	C
AT	AT212	ATAG_2-K1949374	ATTP_2-K1949374	WV Millstätter See	46.7796	13.519	130000	94745	YES	592.156	1894.9	1421.17	2842.35	3434.51	20607	AT21	B
AT	AT211	ATAG_2-K1939997	ATTP_2-K1939997	Stadtgemeinde Villach	46.612	13.8771	200000	149490	YES	934.312	2989.8	2242.35	4484.7	5419.01	32514.1	AT21	B
AT	AT211	ATAG_2-K1931629	ATTP_2-K1931629	Wasserverband Wörthersee Ost	46.6061	14.3337	300000	219672	NO	1372.95	0	0	0	7963.11	47778.7	AT21	A
AT	AT125	ATAG_3-154	ATTP_3-154	ARA Wildendürnbach	48.7556	16.4877	5000	1187	NO	7.41875	0	0	0	43.0288	258.173	AT12	A
AT	AT122	ATAG_3-476	ATTP_3-476	ARA GV Altenmarkt an der Triesting - Kaumberg	48.0108	16.0087	5000	1896	NO	11.85	0	0	0	68.73	412.38	AT12	A
AT	AT124	ATAG_3-355	ATTP_3-355	ARA Hadersdorf	48.4519	15.7194	5000	3069	NO	19.1813	0	0	0	111.251	667.507	AT12	B
AT	AT125	ATAG_3-71	ATTP_3-71	ARA Hohenau an der March	48.6062	16.9137	5000	3541	NO	22.1312	0	0	0	128.361	770.167	AT12	A
AT	AT121	ATAG_3-45	ATTP_3-45	ARA Loosdorf	48.2103	15.3905	5000	6192	NO	38.7	0	0	0	224.46	1346.76	AT12	A
AT	AT121	ATAG_3-80	ATTP_3-80	ARA Lunz am See	47.8553	15.021	5000	833	NO	5.20625	0	0	0	30.1962	181.177	AT12	A
AT	AT121	ATAG_3-176	ATTP_3-176	ARA Ybbsitz	47.9405	14.8511	5000	3068	NO	19.175	0	0	0	111.215	667.29	AT12	C
AT	AT126	ATAG_3-1041	ATTP_3-1041	ARA EVN Wasser (GAV Senningbach)	48.4589	16.239	5000	2343	NO	14.6437	0	0	0	84.9337	509.602	AT12	C
AT	AT121	ATAG_3-46	ATTP_3-46	ARA Pöggstall	48.3153	15.2139	5270	4786	NO	29.9125	0	0	0	173.492	1040.95	AT12	B
AT	AT125	ATAG_3-346	ATTP_3-346	ARA Zellerndorf	48.6999	15.989	5400	3379	NO	21.1188	0	0	0	122.489	734.932	AT12	B
AT	AT121	ATAG_3-1631	ATTP_3-1610	ARA Gaming	47.9401	15.1265	5500	1826	NO	11.4125	0	0	0	66.1925	397.155	AT12	A
AT	AT124	ATAG_3-88	ATTP_3-88	ARA AV Lainsitz-Mitte	48.7063	14.8922	5800	4100	NO	25.625	0	0	0	148.625	891.75	AT12	A
AT	AT125	ATAG_3-91	ATTP_3-91	ARA GAV Retzbach - Retz	48.7413	16.03	5900	4671	NO	29.1937	0	0	0	169.324	1015.94	AT12	C
AT	AT125	ATAG_3-345	ATTP_3-345	ARA Pulkau	48.6998	15.881	5900	2192	NO	13.7	0	0	0	79.46	476.76	AT12	B
AT	AT126	ATAG_3-301	ATTP_3-301	ARA AV Oberes Russbachtal	48.4422	16.4263	6000	4148	NO	25.925	0	0	0	150.365	902.19	AT12	C
AT	AT126	ATAG_3-221	ATTP_3-221	ARA AV Sulzbach	48.4652	16.8082	6000	4667	NO	29.1688	0	0	0	169.179	1015.07	AT12	A
AT	AT126	ATAG_3-166	ATTP_3-166	ARA GAV Kleinharraserbach	48.4592	16.6227	6000	2054	NO	12.8375	0	0	0	74.4575	446.745	AT12	A
AT	AT124	ATAG_3-850	ATTP_3-850	ARA GAV Maignerbach	48.6768	15.8184	6000	951	NO	5.94375	0	0	0	34.4738	206.843	AT12	B
AT	AT126	ATAG_3-829	ATTP_3-829	ARA GAV Unteres Schmidatal	48.3695	16.1075	6000	5245	NO	32.7812	0	0	0	190.131	1140.79	AT12	C
AT	AT125	ATAG_3-683	ATTP_3-683	ARA Herrnbaumgarten	48.6991	16.7033	6000	977	NO	6.10625	0	0	0	35.4162	212.497	AT12	B
AT	AT126	ATAG_3-814	ATTP_3-814	ARA Leopoldsdorf im Marchfelde	48.2321	16.7082	6000	1915	NO	11.9688	0	0	0	69.4187	416.512	AT12	A
AT	AT127	ATAG_3-89	ATTP_3-89	ARA Sooß	47.9834	16.2258	6000	616	NO	3.85	0	0	0	22.33	133.98	AT12	A
AT	AT124	ATAG_3-1701	ATTP_3-1701	ARA Litschau	48.9451	15.0424	6000	3264	NO	20.4	0	0	0	118.32	709.92	AT12	A
AT	AT122	ATAG_3-812	ATTP_3-812	ARA WVG Bad Schönau - Krumbach	47.5049	16.2398	6000	5267	NO	32.9188	0	0	0	190.929	1145.57	AT12	C
AT	AT122	ATAG_3-730	ATTP_3-730	ARA GAV Mittleres Pittental	47.6868	16.1302	6500	6733	NO	42.0813	0	0	0	244.071	1464.43	AT12	C
AT	AT124	ATAG_3-137	ATTP_3-137	ARA Allentsteig	48.7222	15.3275	6600	3039	NO	18.9938	0	0	0	110.164	660.982	AT12	B
AT	AT126	ATAG_3-61	ATTP_3-61	ARA Gablitz	48.2169	16.1639	7000	6440	NO	40.25	0	0	0	233.45	1400.7	AT12	A
AT	AT124	ATAG_3-322	ATTP_3-322	ARA Gars am Kamp	48.5902	15.6573	7000	7058	NO	44.1125	0	0	0	255.853	1535.12	AT12	A
AT	AT121	ATAG_3-701	ATTP_3-701	ARA Göstling	47.8119	14.9298	7000	3650	NO	22.8125	0	0	0	132.312	793.875	AT12	A
AT	AT127	ATAG_3-402	ATTP_3-402	ARA Laxenburg	48.0681	16.3675	7200	2868	NO	17.925	0	0	0	103.965	623.79	AT12	B
AT	AT125	ATAG_3-705	ATTP_3-705	ARA GAV Drasenhofen	48.7659	16.6592	7300	1375	NO	8.59375	0	0	0	49.8438	299.062	AT12	C
AT	AT125	ATAG_3-136	ATTP_3-136	ARA VG Ravelsbach - Maissau	48.5536	15.8866	7372	4833	NO	30.2063	0	0	0	175.196	1051.18	AT12	C
AT	AT124	ATAG_3-434	ATTP_3-434	ARA Groß-Siegharts	48.7994	15.4179	7500	5955	NO	37.2188	0	0	0	215.869	1295.21	AT12	A
AT	AT121	ATAG_3-477	ATTP_3-477	ARA GAV Ruprechtshofen - St. Leonhard am Forst	48.1499	15.2597	8000	7160	NO	44.75	0	0	0	259.55	1557.3	AT12	C
AT	AT121	ATAG_3-109	ATTP_3-109	ARA Haag	48.1148	14.5456	8000	3212	NO	20.075	0	0	0	116.435	698.61	AT12	C
AT	AT125	ATAG_3-99	ATTP_3-99	ARA GAV Raum Groß-Kadolz	48.7099	16.1923	9860	4526	NO	28.2875	0	0	0	164.067	984.405	AT12	A
AT	AT121	ATAG_3-65	ATTP_3-65	ARA GAV Ennsdorf-St.Pantaleon	48.2304	14.5361	10000	11676	NO	72.975	0	0	0	423.255	2539.53	AT12	B
AT	AT126	ATAG_3-842	ATTP_3-842	ARA GAV Östliches Tullnerfeld	48.3087	16.134	10000	4548	NO	28.425	0	0	0	164.865	989.19	AT12	C
AT	AT127	ATAG_3-184	ATTP_3-184	ARA Alland	48.0414	16.101	10000	5667	NO	35.4188	0	0	0	205.429	1232.57	AT12	C
AT	AT127	ATAG_3-63	ATTP_3-63	ARA Seibersdorf	47.9429	16.4943	10000	5110	NO	31.9375	0	0	0	185.238	1111.42	AT12	B
AT	AT122	ATAG_3-408	ATTP_3-408	ARA AV Grimmenstein-Edlitz-Thomasberg	47.6284	16.1299	10270	10864	NO	67.9	0	0	0	393.82	2362.92	AT12	A
AT	AT121	ATAG_3-424	ATTP_3-424	ARA GAV Kleines Erlauftal	48.0707	15.0755	10500	5540	NO	34.625	0	0	0	200.825	1204.95	AT12	C
AT	AT125	ATAG_3-127	ATTP_3-127	ARA Ziersdorf	48.5284	15.9429	6000	5253	NO	32.8313	0	0	0	190.421	1142.53	AT12	B
AT	AT225	ATAG_6-M3728231R0	ATTP_6-M3728231R0	Lebring-St.Margarethen	46.844	15.5508	7000	3215	NO	20.0938	0	0	0	116.544	699.262	AT22	B
AT	AT224	ATAG_6-M3586829R0	ATTP_6-M3586829R0	Vorau	47.3981	15.9058	7000	3397	NO	21.2312	0	0	0	123.141	738.847	AT22	C
AT	AT224	ATAG_6-M3283419R0	ATTP_6-M3283419R0	Bad Waltersdorf-Leitersdorf	47.1485	16.0338	7000	6428	NO	40.175	0	0	0	233.015	1398.09	AT22	B
AT	AT222	ATAG_6-M3318866R0	ATTP_6-M3318866R0	Altenmarkt bei St. Gallen	47.7141	14.637	7500	3423	NO	21.3938	0	0	0	124.084	744.502	AT22	A
AT	AT224	ATAG_6-M4321937	ATTP_6-M4321937	Birkfeld	47.3505	15.6979	7500	4188	NO	26.175	0	0	0	151.815	910.89	AT22	A
AT	AT225	ATAG_6-M3455849R0	ATTP_6-M3455849R0	Pitschgau-Eibiswald	46.702	15.2943	7520	5424	NO	33.9	0	0	0	196.62	1179.72	AT22	B
AT	AT224	ATAG_6-M3634931R0	ATTP_6-M3634931R0	Lafnitz-Rohrbach	47.3561	16.0285	8000	6098	NO	38.1125	0	0	0	221.053	1326.31	AT22	C
AT	AT224	ATAG_6-M3292250R0	ATTP_6-M3292250R0	Unterfeistritz	47.2397	15.7407	8000	5167	NO	32.2938	0	0	0	187.304	1123.82	AT22	C
AT	AT225	ATAG_6-M3728315R0	ATTP_6-M3728315R0	Gralla	46.8161	15.5802	8000	2883	NO	18.0188	0	0	0	104.509	627.053	AT22	B
AT	AT226	ATAG_6-M3520257R0	ATTP_6-M3520257R0	Neumarkt	47.0611	14.4313	8000	6358	NO	39.7375	0	0	0	230.478	1382.87	AT22	A
AT	AT222	ATAG_6-M3589961R0	ATTP_6-M3589961R0	Trieben	47.4977	14.4707	8500	7989	YES	49.9313	159.78	119.835	239.67	289.601	1737.61	AT22	B
AT	AT222	ATAG_6-M3670920R0	ATTP_6-M3670920R0	Gröbming-Ennsboden	47.4364	13.92	9000	7482	NO	46.7625	0	0	0	271.222	1627.33	AT22	C
AT	AT222	ATAG_6-M3341478R0	ATTP_6-M3341478R0	Hall/Admont	47.5809	14.4681	9000	4086	YES	25.5375	81.72	61.29	122.58	148.117	888.705	AT22	B
AT	AT224	ATAG_6-M3235303R0	ATTP_6-M3235303R0	Pöllau-VKA	47.2851	15.8471	9000	7213	NO	45.0813	0	0	0	261.471	1568.83	AT22	C
AT	AT222	ATAG_6-M3273368R0	ATTP_6-M3273368R0	Bad Mitterndorf	47.5469	13.9218	9400	2048	YES	12.8	40.96	30.72	61.44	74.24	445.44	AT22	A
AT	AT225	ATAG_6-M3230905R0	ATTP_6-M3230905R0	St.Johann im Saggautal	46.7253	15.4132	10000	8074	NO	50.4625	0	0	0	292.683	1756.1	AT22	C
AT	AT221	ATAG_6-M3445287R0	ATTP_6-M3445287R0	Dobl-Muttendorf	46.939	15.3712	10000	8670	NO	54.1875	0	0	0	314.287	1885.72	AT22	B
AT	AT224	ATAG_6-M3283441R0	ATTP_6-M3283441R0	Sebersdorf	47.1824	16.0013	10000	4700	NO	29.375	0	0	0	170.375	1022.25	AT22	B
AT	AT223	ATAG_6-M3616874R0	ATTP_6-M3616874R0	Mariazell	47.7611	15.3067	11000	5373	NO	33.5813	0	0	0	194.771	1168.63	AT22	A
AT	AT222	ATAG_6-M3336492R0	ATTP_6-M3336492R0	Rottenmann	47.5311	14.3191	11000	6513	YES	40.7063	130.26	97.695	195.39	236.096	1416.58	AT22	C
AT	AT224	ATAG_6-M3230038R0	ATTP_6-M3230038R0	Passail	47.2579	15.5038	11000	7699	NO	48.1188	0	0	0	279.089	1674.53	AT22	C
AT	AT226	ATAG_6-M3675325R0	ATTP_6-M3675325R0	Fohnsdorf	47.1895	14.6887	11000	10423	YES	65.1437	208.46	156.345	312.69	377.834	2267	AT22	A
AT	AT224	ATAG_6-M3680278R0	ATTP_6-M3680278R0	Fehring	46.9438	16.0172	11000	8981	NO	56.1313	0	0	0	325.561	1953.37	AT22	B
AT	AT221	ATAG_6-M3507571R0	ATTP_6-M3507571R0	Lieboch	46.9639	15.3455	12000	8167	NO	51.0437	0	0	0	296.054	1776.32	AT22	A
AT	AT224	ATAG_6-M3448019R0	ATTP_6-M3448019R0	Fladnitz im Raabtal	46.9817	15.7989	12000	8027	NO	50.1687	0	0	0	290.979	1745.87	AT22	C
AT	AT223	ATAG_6-M3410748R0	ATTP_6-M3410748R0	Eisenerz	47.5663	14.8541	12000	9355	NO	58.4688	0	0	0	339.119	2034.71	AT22	A
AT	AT222	ATAG_6-M3776783R0	ATTP_6-M3776783R0	Ramsau	47.4197	13.6826	12550	6059	NO	37.8687	0	0	0	219.639	1317.83	AT22	B
AT	AT221	ATAG_6-M3232571R0	ATTP_6-M3232571R0	Hitzendorf	47.027	15.304	14000	13026	NO	81.4125	0	0	0	472.192	2833.15	AT22	B
AT	AT222	ATAG_6-M3327097R0	ATTP_6-M3327097R0	Pichl-Preunegg	47.3957	13.5885	14000	7364	NO	46.025	0	0	0	266.945	1601.67	AT22	C
AT	AT222	ATAG_6-M3226627R0	ATTP_6-M3226627R0	Liezen	47.5569	14.2592	14000	15086	YES	94.2875	301.72	226.29	452.58	546.868	3281.2	AT22	A
AT	AT224	ATAG_6-M3343322R0	ATTP_6-M3343322R0	Bad Radkersburg	46.6839	16.0058	16000	9468	NO	59.175	0	0	0	343.215	2059.29	AT22	B
AT	AT225	ATAG_6-M3446308R0	ATTP_6-M3446308R0	Zehndorf	46.8438	15.4177	17000	9005	NO	56.2812	0	0	0	326.431	1958.59	AT22	C
AT	AT314	ATAG_4-40920002	ATTP_4-40920002	Mittleres Steyrtal	47.9808	14.2752	5000	2223	NO	13.8937	0	0	0	80.5837	483.502	AT31	A
AT	AT313	ATAG_4-41312002	ATTP_4-41312002	Niederranna Hofkirchen	48.4673	13.7982	5000	2553	NO	15.9562	0	0	0	92.5462	555.277	AT31	C
AT	AT212	ATAG_2-K2391520	ATTP_2-K2391520	Marktgemeinde Steinfeld und Greifenburg/Gemeinde Weißensee	46.7548	13.2609	13300	8678	NO	54.2375	0	0	0	314.577	1887.47	AT21	A
AT	AT212	ATAG_2-K1620535R0	ATTP_2-K1620535R0	WV Reinhalteverband Mölltal	46.9193	13.2165	15000	7716	NO	48.225	0	0	0	279.705	1678.23	AT21	C
AT	AT211	ATAG_2-K1822227R0	ATTP_2-K1822227R0	Wasserverband Unteres Drautal	46.6717	13.729	23000	10034	NO	62.7125	0	0	0	363.732	2182.39	AT21	C
AT	AT213	ATAG_2-K1750774R0	ATTP_2-K1750774R0	Gemeinde St. Kanzian am Klopeinersee	46.6206	14.5863	25000	11667	NO	72.9188	0	0	0	422.929	2537.57	AT21	B
AT	AT213	ATAG_2-K1610301R0	ATTP_2-K1610301R0	WV Abwasserverband Raum Friesach-Althofen	46.8608	14.4558	32000	27844	YES	174.025	556.88	417.66	835.32	1009.35	6056.07	AT21	B
AT	AT212	ATAG_2-K1949430	ATTP_2-K1949430	Abwasserverband Karnische Region	46.6103	13.4911	44000	18465	NO	115.406	0	0	0	669.356	4016.14	AT21	C
AT	AT211	ATAG_2-K1944050	ATTP_2-K1944050	Abwasserverband Wörthersee West	46.5732	14.024	44000	26354	NO	164.713	0	0	0	955.332	5731.99	AT21	C
AT	AT213	ATAG_2-K1518811R0	ATTP_2-K1518811R0	WV Abwasserverband Völkermarkt-Jaunfeld (Eberndorf)	46.6399	14.6538	46000	35642	NO	222.763	0	0	0	1292.02	7752.14	AT21	C
AT	AT212	ATAG_2-K1939137	ATTP_2-K1939137	WV Ossiacher See	46.7121	14.0817	50000	34850	YES	217.812	697	522.75	1045.5	1263.31	7579.88	AT21	A
AT	AT311	ATAG_4-40818001	ATTP_4-40818001	Neumarkt /Hausruck	48.2734	13.7379	10750	7957	NO	49.7312	0	0	0	288.441	1730.65	AT31	A
AT	AT315	ATAG_4-40704001	ATTP_4-40704001	Ebensee	47.8119	13.7817	12000	8426	NO	52.6625	0	0	0	305.442	1832.65	AT31	A
AT	AT315	ATAG_4-40719002	ATTP_4-40719002	Scharnstein	47.9157	13.9762	12500	7803	NO	48.7688	0	0	0	282.859	1697.15	AT31	A
AT	AT313	ATAG_4-41123001	ATTP_4-41123001	Machland Ost Saxen	48.199	14.8006	12700	6395	NO	39.9688	0	0	0	231.819	1390.91	AT31	B
AT	AT314	ATAG_4-40923001	ATTP_4-40923001	Windischgarsten	47.7227	14.302	16100	14227	YES	88.9188	284.54	213.405	426.81	515.729	3094.37	AT31	B
AT	AT315	ATAG_4-40720001	ATTP_4-40720001	Vorchdorf	48.0173	13.9099	17000	12942	NO	80.8875	0	0	0	469.147	2814.88	AT31	B
AT	AT311	ATAG_4-40401001	ATTP_4-40401001	Altheim und Umgebung	48.2603	13.2105	19000	13324	NO	83.275	0	0	0	482.995	2897.97	AT31	C
AT	AT313	ATAG_4-40614001	ATTP_4-40614001	Untere Feldaist	48.3532	14.5257	21500	10056	YES	62.85	201.12	150.84	301.68	364.53	2187.18	AT31	A
AT	AT315	ATAG_4-41710001	ATTP_4-41710001	Frankenmarkt	47.9877	13.4485	21700	11870	NO	74.1875	0	0	0	430.287	2581.72	AT31	A
AT	AT315	ATAG_4-40702001	ATTP_4-40702001	Hallstättersee	47.6664	13.6081	22000	19765	YES	123.531	395.3	296.475	592.95	716.481	4298.89	AT31	A
AT	AT314	ATAG_4-41503001	ATTP_4-41503001	Kurbezirk Bad Hall	48.049	14.2054	22000	15185	NO	94.9062	0	0	0	550.456	3302.74	AT31	A
AT	AT312	ATAG_4-41605001	ATTP_4-41605001	Gallneukirchner Becken	48.3411	14.4509	22838	15199	YES	94.9937	303.98	227.985	455.97	550.964	3305.78	AT31	A
AT	AT311	ATAG_4-40831002	ATTP_4-40831002	Aschachtal	48.355	13.8706	25000	18064	YES	112.9	361.28	270.96	541.92	654.82	3928.92	AT31	C
AT	AT311	ATAG_4-41220001	ATTP_4-41220001	Mittlere Antiesen	48.3249	13.43	25000	19244	NO	120.275	0	0	0	697.595	4185.57	AT31	B
AT	AT315	ATAG_4-41715001	ATTP_4-41715001	Mondsee-Irrsee	47.8383	13.3547	25360	19565	YES	122.281	391.3	293.475	586.95	709.231	4255.39	AT31	A
AT	AT312	ATAG_4-41014001	ATTP_4-41014001	Unteres Kremstal	48.1513	14.2298	26000	16705	YES	104.406	334.1	250.575	501.15	605.556	3633.34	AT31	B
AT	AT311	ATAG_4-41422001	ATTP_4-41422001	Schärding	48.4644	13.4346	27000	12088	YES	75.55	241.76	181.32	362.64	438.19	2629.14	AT31	A
AT	AT313	ATAG_4-40601002	ATTP_4-40601002	Freistadt	48.4944	14.5065	30000	27555	YES	172.219	551.1	413.325	826.65	998.869	5993.21	AT31	A
AT	AT313	ATAG_4-41111001	ATTP_4-41111001	Mauthausen-Ost	48.2339	14.5571	30000	32316	YES	201.975	646.32	484.74	969.48	1171.45	7028.73	AT31	B
AT	AT313	ATAG_4-41116001	ATTP_4-41116001	Perg	48.2329	14.6453	30000	22290	NO	139.312	0	0	0	808.012	4848.07	AT31	B
AT	AT313	ATAG_4-41307001	ATTP_4-41307001	Mühltal	48.5168	14.0329	31000	23753	NO	148.456	0	0	0	861.046	5166.28	AT31	C
AT	AT311	ATAG_4-40404001	ATTP_4-40404001	Braunau	48.2646	13.0596	38500	38289	YES	239.306	765.78	574.335	1148.67	1387.98	8327.86	AT31	A
AT	AT314	ATAG_4-40922001	ATTP_4-40922001	Oberes Kremstal	48.006	14.1181	45000	26294	YES	164.338	525.88	394.41	788.82	953.157	5718.94	AT31	C
AT	AT312	ATAG_4-41811001	ATTP_4-41811001	Raum Lambach	48.0943	13.9221	47500	23748	YES	148.425	474.96	356.22	712.44	860.865	5165.19	AT31	A
AT	AT315	ATAG_4-41738002	ATTP_4-41738002	Schwanenstadt	48.055	13.7924	50000	25682	NO	160.513	0	0	0	930.973	5585.84	AT31	B
AT	AT311	ATAG_4-40421001	ATTP_4-40421001	Mattig-Hainbach	48.1248	13.1323	54000	30248	YES	189.05	604.96	453.72	907.44	1096.49	6578.94	AT31	C
AT	AT312	ATAG_4-40509001	ATTP_4-40509001	Eferding	48.323	14.0471	60000	31566	YES	197.288	631.32	473.49	946.98	1144.27	6865.6	AT31	C
AT	AT315	ATAG_4-41713002	ATTP_4-41713002	Attersee	47.9682	13.6082	65000	45085	YES	281.781	901.7	676.275	1352.55	1634.33	9805.99	AT31	A
AT	AT311	ATAG_4-40832001	ATTP_4-40832001	Trattnachtal	48.241	13.9673	65000	59299	YES	370.619	1185.98	889.485	1778.97	2149.59	12897.5	AT31	C
AT	AT315	ATAG_4-41711001	ATTP_4-41711001	Vöckla - Redl	48.0211	13.5338	70000	42845	YES	267.781	856.9	642.675	1285.35	1553.13	9318.79	AT31	C
AT	AT315	ATAG_4-41703001	ATTP_4-41703001	Ager-West	48.0154	13.7466	76000	59055	YES	369.094	1181.1	885.825	1771.65	2140.74	12844.5	AT31	A
AT	AT311	ATAG_4-41225001	ATTP_4-41225001	Ried und Umgebung	48.2251	13.4791	79700	40350	YES	252.188	807	605.25	1210.5	1462.69	8776.12	AT31	A
AT	AT315	ATAG_4-40703001	ATTP_4-40703001	Wolfgangsee-Ischl	47.7249	13.6484	100000	40144	YES	250.9	802.88	602.16	1204.32	1455.22	8731.32	AT31	A
AT	AT315	ATAG_4-40708001	ATTP_4-40708001	Traunsee-Nord	47.9421	13.8032	106000	81454	YES	509.088	1629.08	1221.81	2443.62	2952.71	17716.2	AT31	A
AT	AT314	ATAG_4-40201001	ATTP_4-40201001	Steyr und Umgebung	48.0639	14.4328	140000	101128	YES	632.05	2022.56	1516.92	3033.84	3665.89	21995.3	AT31	A
AT	AT312	ATAG_4-41812001	ATTP_4-41812001	Welser Heide	48.1822	14.1375	160000	167159	YES	1044.74	3343.18	2507.39	5014.77	6059.51	36357.1	AT31	B
AT	AT312	ATAG_4-40502002	ATTP_4-40502002	AGRANA	48.3624	14.015	205600	3080	NO	19.25	0	0	0	111.65	669.9	AT31	A
AT	AT312	ATAG_4-41003001	ATTP_4-41003001	Asten - Regionalkläranlage	48.2366	14.4122	950000	951808	YES	5948.8	19036.2	14277.1	28554.2	34503	207018	AT31	A
AT	AT323	ATAG_5-A1651372R143	ATTP_5-A1651372R143	ARA Annaberg	47.5371	13.4223	5700	5103	NO	31.8938	0	0	0	184.984	1109.9	AT32	C
AT	AT323	ATAG_5-A1705398R154	ATTP_5-A1705398R154	ARA Faistenau	47.7591	13.2302	6750	3500	NO	21.875	0	0	0	126.875	761.25	AT32	C
AT	AT322	ATAG_5-A1780441R157	ATTP_5-A1780441R157	ARA Mühlbach	47.3806	13.1497	9000	4220	NO	26.375	0	0	0	152.975	917.85	AT32	C
AT	AT322	ATAG_5-A1779204R157	ATTP_5-A1779204R157	ARA Filzmoos	47.4294	13.5318	10000	3781	NO	23.6312	0	0	0	137.061	822.367	AT32	A
AT	AT322	ATAG_5-A1841691R161	ATTP_5-A1841691R161	ARA Rauris	47.2511	12.9863	10500	7119	NO	44.4937	0	0	0	258.064	1548.38	AT32	C
AT	AT323	ATAG_5-A1651838R143	ATTP_5-A1651838R143	ARA Abtenau	47.5921	13.3205	12088	7616	NO	47.6	0	0	0	276.08	1656.48	AT32	A
AT	AT322	ATAG_5-A1781001R157	ATTP_5-A1781001R157	ARA Fritztal-Hüttau	47.4219	13.2967	14000	9829	NO	61.4313	0	0	0	356.301	2137.81	AT32	C
AT	AT323	ATAG_5-A1698988R154	ATTP_5-A1698988R154	ARA Wallersee-Nord-Neumarkt	47.9437	13.2079	15000	12511	NO	78.1938	0	0	0	453.524	2721.14	AT32	B
AT	AT322	ATAG_5-A1779078R157	ATTP_5-A1779078R157	ARA Großarlertal	47.2799	13.2171	18000	11144	NO	69.65	0	0	0	403.97	2423.82	AT32	A
AT	AT323	ATAG_5-A1703863R154	ATTP_5-A1703863R154	ARA Fuschlsee-Thalgau	47.8378	13.2743	23500	20592	NO	128.7	0	0	0	746.46	4478.76	AT32	A
AT	AT323	ATAG_5-A1700495R154	ATTP_5-A1700495R154	ARA Pladenbach	47.9929	12.8701	24000	22497	NO	140.606	0	0	0	815.516	4893.1	AT32	B
AT	AT322	ATAG_5-A1843680R161	ATTP_5-A1843680R161	ARA Saalachtal-Unken	47.6635	12.7538	24500	9970	YES	62.3125	199.4	149.55	299.1	361.413	2168.47	AT32	C
AT	AT321	ATAG_5-A1805835R161	ATTP_5-A1805835R161	ARA St.Michael i.Lg.	47.0929	13.6468	25000	12486	NO	78.0375	0	0	0	452.618	2715.7	AT32	A
AT	AT322	ATAG_5-A1848116R161	ATTP_5-A1848116R161	ARA Unterpinzgau-Bruck	47.2828	12.8672	25000	9370	NO	58.5625	0	0	0	339.662	2037.97	AT32	A
AT	AT322	ATAG_5-A1844700R161	ATTP_5-A1844700R161	ARA Oberpinzgau Mitte-Niedernsill	47.2815	12.6677	27000	24214	YES	151.338	484.28	363.21	726.42	877.758	5266.55	AT32	C
AT	AT323	ATAG_5-A1651310R143	ATTP_5-A1651310R143	ARA Tennengau-Süd-Kuchl	47.6542	13.1222	32000	18648	YES	116.55	372.96	279.72	559.44	675.99	4055.94	AT32	A
AT	AT321	ATAG_5-A2444685	ATTP_5-A2444685	ARA Zentralraum Lungau	47.1179	13.8143	32000	22707	YES	141.919	454.14	340.605	681.21	823.129	4938.77	AT32	B
AT	AT323	ATAG_5-A1700419R154	ATTP_5-A1700419R154	ARA Wallersee-Süd-Seekirchen	47.8851	13.1206	35000	29777	YES	186.106	595.54	446.655	893.31	1079.42	6476.5	AT32	A
AT	AT322	ATAG_5-A1842420R161	ATTP_5-A1842420R161	ARA Bramberg, Oberpinzgau West	47.2794	12.3967	40000	20972	YES	131.075	419.44	314.58	629.16	760.235	4561.41	AT32	B
AT	AT323	ATAG_5-A1700239R154	ATTP_5-A1700239R154	ARA Trumerseen	47.9812	13.0865	40000	20156	YES	125.975	403.12	302.34	604.68	730.655	4383.93	AT32	C
AT	AT322	ATAG_5-A1780627R157	ATTP_5-A1780627R157	ARA Gasteinertal	47.2648	13.0804	45000	32367	YES	202.294	647.34	485.505	971.01	1173.3	7039.82	AT32	C
AT	AT322	ATAG_5-A1824831R161	ATTP_5-A1824831R161	ARA Saalbach	47.3718	12.6924	49000	25885	YES	161.781	517.7	388.275	776.55	938.331	5629.99	AT32	C
AT	AT322	ATAG_5-A1844668R161	ATTP_5-A1844668R161	ARA Zeller Becken	47.2831	12.7913	70000	44606	NO	278.788	0	0	0	1616.97	9701.8	AT32	C
AT	AT322	ATAG_5-A1836862R161	ATTP_5-A1836862R161	ARA Saalachtal-Saalfelden	47.4632	12.8266	80000	77154	YES	482.213	1543.08	1157.31	2314.62	2796.83	16781	AT32	C
AT	AT322	ATAG_5-A1779244R157	ATTP_5-A1779244R157	ARA Salzach-Pongau	47.4386	13.2109	125000	87380	NO	546.125	0	0	0	3167.53	19005.1	AT32	A
AT	AT322	ATAG_5-A1777733R157	ATTP_5-A1777733R157	ARA Salzburger Ennstal	47.387	13.4954	125000	49826	YES	311.413	996.52	747.39	1494.78	1806.19	10837.2	AT32	C
AT	AT323	ATAG_5-A1699622R154	ATTP_5-A1699622R154	ARA Siggerwiesen	47.8597	13.0025	680000	509019	YES	3181.37	10180.4	7635.28	15270.6	18451.9	110712	AT32	A
AT	AT225	ATAG_6-M3306173R0	ATTP_6-M3306173R0	Wies	46.721	15.2801	5000	3395	NO	21.2188	0	0	0	123.069	738.412	AT22	B
AT	AT224	ATAG_6-M3192786R0	ATTP_6-M3192786R0	Ilztal	47.1384	15.7908	5000	3980	NO	24.875	0	0	0	144.275	865.65	AT22	B
AT	AT224	ATAG_6-M3411539R0	ATTP_6-M3411539R0	Kaindorf-RHV	47.2149	15.9104	5000	7164	NO	44.775	0	0	0	259.695	1558.17	AT22	B
AT	AT223	ATAG_6-M3426844R0	ATTP_6-M3426844R0	Kalwang	47.418	14.7645	5000	1930	NO	12.0625	0	0	0	69.9625	419.775	AT22	B
AT	AT222	ATAG_6-M3464616R0	ATTP_6-M3464616R0	Haus	47.4143	13.7726	5400	4287	NO	26.7938	0	0	0	155.404	932.423	AT22	B
AT	AT224	ATAG_6-M3326085R0	ATTP_6-M3326085R0	Stubenberg	47.2368	15.7967	5500	2514	NO	15.7125	0	0	0	91.1325	546.795	AT22	A
AT	AT222	ATAG_6-M3222800R0	ATTP_6-M3222800R0	Aigen im Ennstal	47.5443	14.146	6000	4866	NO	30.4125	0	0	0	176.392	1058.35	AT22	B
AT	AT224	ATAG_6-M3719878R0	ATTP_6-M3719878R0	Sinabelkirchen	47.0975	15.8322	6250	5023	NO	31.3938	0	0	0	182.084	1092.5	AT22	B
AT	AT224	ATAG_6-M3532431R0	ATTP_6-M3532431R0	St.Stefan im Rosental	46.8961	15.7197	6300	6884	NO	43.025	0	0	0	249.545	1497.27	AT22	B
AT	AT225	ATAG_6-M3456540R0	ATTP_6-M3456540R0	Sulmeck-Greith-Gasselsdorf	46.7347	15.3364	6500	9543	NO	59.6438	0	0	0	345.934	2075.6	AT22	C
AT	AT224	ATAG_6-M3756860R0	ATTP_6-M3756860R0	Grosssteinbach	47.1427	15.8885	6800	5058	NO	31.6125	0	0	0	183.352	1100.12	AT22	B
AT	AT225	ATAG_6-M3280413R0	ATTP_6-M3280413R0	Heiligenkreuz am Waasen	46.9525	15.5908	7000	7503	NO	46.8938	0	0	0	271.984	1631.9	AT22	B
AT	AT341	ATAG_8-Bezau	ATTP_8-Bezau	Bezau	47.3864	9.8838	37750	16051	YES	100.319	321.02	240.765	481.53	581.849	3491.09	AT34	A
AT	AT342	ATAG_8-Leiblachtal	ATTP_8-Leiblachtal	Leiblachtal	47.5332	9.73659	41500	33402	YES	208.763	668.04	501.03	1002.06	1210.82	7264.93	AT34	A
AT	AT341	ATAG_8-Egg	ATTP_8-Egg	Egg	47.4339	9.89362	42300	9740	NO	60.875	0	0	0	353.075	2118.45	AT34	A
AT	AT341	ATAG_8-Lech	ATTP_8-Lech	Lech	47.2194	10.153	50000	27810	YES	173.812	556.2	417.15	834.3	1008.11	6048.67	AT34	A
AT	AT342	ATAG_8-Walgau	ATTP_8-Walgau	Walgau	47.223	9.65583	56250	24652	YES	154.075	493.04	369.78	739.56	893.635	5361.81	AT34	A
AT	AT341	ATAG_8-Montafon	ATTP_8-Montafon	Montafon	47.1169	9.85611	62500	35427	YES	221.419	708.54	531.405	1062.81	1284.23	7705.37	AT34	B
AT	AT342	ATAG_8-Bregenz	ATTP_8-Bregenz	Bregenz	47.5045	9.70669	75000	38372	YES	239.825	767.44	575.58	1151.16	1390.99	8345.91	AT34	B
AT	AT341	ATAG_8-Ludesch	ATTP_8-Ludesch	Ludesch	47.1746	9.77011	108000	69454	YES	434.088	1389.08	1041.81	2083.62	2517.71	15106.2	AT34	A
AT	AT342	ATAG_8-Dornbirn	ATTP_8-Dornbirn	Dornbirn	47.4317	9.72592	150000	86246	YES	539.038	1724.92	1293.69	2587.38	3126.42	18758.5	AT34	A
AT	AT342	ATAG_8-Hohenems	ATTP_8-Hohenems	Hohenems	47.3656	9.66305	170000	74655	YES	466.594	1493.1	1119.83	2239.65	2706.24	16237.5	AT34	A
AT	AT342	ATAG_8-Hofsteig	ATTP_8-Hofsteig	Hofsteig	47.4859	9.67653	271600	149292	YES	933.075	2985.84	2239.38	4478.76	5411.83	32471	AT34	A
AT	AT342	ATAG_8-Meiningen	ATTP_8-Meiningen	Meiningen	47.3085	9.58972	380000	267697	YES	1673.11	5353.94	4015.45	8030.91	9704.02	58224.1	AT34	B
AT	AT130	ATAG_9-HKA-Simmering	ATTP_9-HKA-Simmering	Hauptkläranlage Wien	48.1723	16.4653	4000000	3118566	YES	19491	62371.3	46778.5	93557	113048	678288	AT13	A
AT	AT224	ATAG_6-M3231297R0	ATTP_6-M3231297R0	Gnas	46.8549	15.8255	7000	5045	NO	31.5312	0	0	0	182.881	1097.29	AT22	C
AT	AT223	ATAG_6-M3449658R0	ATTP_6-M3449658R0	Wartberg/Mürz-II	47.5241	15.4656	17000	25730	YES	160.812	514.6	385.95	771.9	932.712	5596.27	AT22	C
AT	AT224	ATAG_6-M3756265R0	ATTP_6-M3756265R0	Bad Gleichenberg-Neu	46.8453	15.8956	17500	7479	NO	46.7438	0	0	0	271.114	1626.68	AT22	B
AT	AT225	ATAG_6-M3384279R0	ATTP_6-M3384279R0	Stainz	46.8857	15.2881	20500	16135	YES	100.844	322.7	242.025	484.05	584.894	3509.36	AT22	B
AT	AT223	ATAG_6-M3290534R0	ATTP_6-M3290534R0	Trofaiach	47.414	15.02	21000	16134	YES	100.837	322.68	242.01	484.02	584.857	3509.14	AT22	A
AT	AT226	ATAG_6-M3699458R0	ATTP_6-M3699458R0	Murau	47.1083	14.1904	22000	9290	NO	58.0625	0	0	0	336.762	2020.57	AT22	A
AT	AT225	ATAG_6-M3444791R0	ATTP_6-M3444791R0	Frauental	46.8286	15.2715	22000	18256	NO	114.1	0	0	0	661.78	3970.68	AT22	B
AT	AT223	ATAG_6-M3406862R0	ATTP_6-M3406862R0	St.Michael	47.3373	15.0321	23000	12973	YES	81.0812	259.46	194.595	389.19	470.271	2821.63	AT22	A
AT	AT223	ATAG_6-M3450226R0	ATTP_6-M3450226R0	Langenwang/Mürz-I	47.5604	15.6083	24000	29678	YES	185.487	593.56	445.17	890.34	1075.83	6454.96	AT22	A
AT	AT225	ATAG_6-M4343579	ATTP_6-M4343579	Köflach-Gradnerbachtal	47.0625	15.0972	25000	21927	YES	137.044	438.54	328.905	657.81	794.854	4769.12	AT22	A
AT	AT226	ATAG_6-M3751070R0	ATTP_6-M3751070R0	Judenburg	47.1703	14.6738	25000	18149	YES	113.431	362.98	272.235	544.47	657.901	3947.41	AT22	A
AT	AT222	ATAG_6-M3691867R0	ATTP_6-M3691867R0	Bad Aussee	47.6017	13.7587	25000	17613	NO	110.081	0	0	0	638.471	3830.83	AT22	B
AT	AT223	ATAG_6-M3646738R0	ATTP_6-M3646738R0	St.Marein/Mürz-III	47.4696	15.3605	26000	18784	YES	117.4	375.68	281.76	563.52	680.92	4085.52	AT22	A
AT	AT221	ATAG_6-M3263261R0	ATTP_6-M3263261R0	Frohnleiten	47.2559	15.3153	28000	7709	NO	48.1813	0	0	0	279.451	1676.71	AT22	C
AT	AT226	ATAG_6-M3685913R0	ATTP_6-M3685913R0	Zeltweg	47.1877	14.7594	30000	21157	YES	132.231	423.14	317.355	634.71	766.941	4601.65	AT22	A
AT	AT224	ATAG_6-M3255142R0	ATTP_6-M3255142R0	Weiz	47.2064	15.6342	30000	20574	YES	128.588	411.48	308.61	617.22	745.807	4474.84	AT22	A
AT	AT222	ATAG_6-M3517936R0	ATTP_6-M3517936R0	Schladming	47.3979	13.7039	31000	19040	NO	119	0	0	0	690.2	4141.2	AT22	A
AT	AT224	ATAG_6-M3407477R0	ATTP_6-M3407477R0	Gleisdorf	47.0931	15.7132	32000	39806	YES	248.788	796.12	597.09	1194.18	1442.97	8657.81	AT22	A
AT	AT225	ATAG_6-M3690570R0	ATTP_6-M3690570R0	Voitsberg	47.0305	15.1853	32000	19723	YES	123.269	394.46	295.845	591.69	714.959	4289.75	AT22	A
AT	AT224	ATAG_6-M3710856R0	ATTP_6-M3710856R0	Feldbach-Raabau	46.953	15.9261	35000	29543	YES	184.644	590.86	443.145	886.29	1070.93	6425.6	AT22	B
AT	AT223	ATAG_6-M3586337R0	ATTP_6-M3586337R0	Bruck	47.394	15.2861	36000	28458	YES	177.862	569.16	426.87	853.74	1031.6	6189.61	AT22	A
AT	AT224	ATAG_6-M3474844R0	ATTP_6-M3474844R0	Fürstenfeld	47.0445	16.0995	38000	31512	NO	196.95	0	0	0	1142.31	6853.86	AT22	B
AT	AT225	ATAG_6-M3679960R0	ATTP_6-M3679960R0	Söding	46.9904	15.2909	38000	22194	YES	138.713	443.88	332.91	665.82	804.533	4827.19	AT22	B
AT	AT225	ATAG_6-M3358117R0	ATTP_6-M3358117R0	Strass	46.7174	15.6245	39000	36021	YES	225.131	720.42	540.315	1080.63	1305.76	7834.57	AT22	B
AT	AT223	ATAG_6-M3647058R0	ATTP_6-M3647058R0	Kapfenberg/Mürz-IV	47.4297	15.2713	49000	42850	NO	267.812	0	0	0	1553.31	9319.88	AT22	A
AT	AT225	ATAG_6-M3453257R0	ATTP_6-M3453257R0	Wagna-Leibnitz	46.7646	15.5688	50000	38125	YES	238.281	762.5	571.875	1143.75	1382.03	8292.19	AT22	A
AT	AT224	ATAG_6-M3400230R0	ATTP_6-M3400230R0	Hartberg	47.271	15.9797	69000	62477	YES	390.481	1249.54	937.155	1874.31	2264.79	13588.7	AT22	B
AT	AT226	ATAG_6-M4274145	ATTP_6-M4274145	Knittelfeld	47.2211	14.8436	70000	90944	NO	568.4	0	0	0	3296.72	19780.3	AT22	A
AT	AT223	ATAG_6-M3409760R0	ATTP_6-M3409760R0	Leoben	47.3873	15.1065	90000	44165	YES	276.031	883.3	662.475	1324.95	1600.98	9605.89	AT22	A
AT	AT225	ATAG_6-M3223510R0	ATTP_6-M3223510R0	Wildon	46.879	15.5305	120000	83033	YES	518.956	1660.66	1245.49	2490.99	3009.95	18059.7	AT22	B
AT	AT226	ATAG_6-M3641482R0	ATTP_6-M3641482R0	Pöls-VKA	47.2178	14.5966	198667	9000	NO	56.25	0	0	0	326.25	1957.5	AT22	A
AT	AT221	ATAG_6-M3489301R0	ATTP_6-M3489301R0	Graz-Gössendorf	46.9964	15.472	500000	492391	YES	3077.44	9847.82	7385.86	14771.7	17849.2	107095	AT22	A
AT	AT221	ATAG_6-M3631054R0	ATTP_6-M3631054R0	Gratkorn	47.1341	15.3341	533000	25000	NO	156.25	0	0	0	906.25	5437.5	AT22	A
AT	AT334	ATAG_7-7604508	ATTP_7-7604508	Fließ	47.1251	10.5819	5000	3665	NO	22.9062	0	0	0	132.856	797.137	AT33	C
AT	AT333	ATAG_7-7724703	ATTP_7-7724703	St. Jakob i.D.	46.9153	12.3694	5000	1608	YES	10.05	32.16	24.12	48.24	58.29	349.74	AT33	C
AT	AT332	ATAG_7-7330305	ATTP_7-7330305	Mühlbachl	47.1399	11.4527	10000	8371	YES	52.3188	167.42	125.565	251.13	303.449	1820.69	AT33	A
AT	AT334	ATAG_7-7615507	ATTP_7-7615507	Nauders	46.9073	10.4961	10000	4665	YES	29.1562	93.3	69.975	139.95	169.106	1014.64	AT33	C
AT	AT333	ATAG_7-7704702	ATTP_7-7704702	Anras	46.7626	12.5666	14000	14228	NO	88.925	0	0	0	515.765	3094.59	AT33	C
AT	AT335	ATAG_7-7529109	ATTP_7-7529109	Walchsee	47.6497	12.3469	14850	9373	NO	58.5813	0	0	0	339.771	2038.63	AT33	A
AT	AT335	ATAG_7-7419207	ATTP_7-7419207	Waidring	47.5857	12.6006	15100	6747	YES	42.1688	134.94	101.205	202.41	244.579	1467.47	AT33	C
AT	AT334	ATAG_7-7623505	ATTP_7-7623505	See	47.0919	10.4784	16137	5041	NO	31.5062	0	0	0	182.736	1096.42	AT33	B
AT	AT335	ATAG_7-7518105	ATTP_7-7518105	Niederndorf	47.644	12.1988	18000	10312	YES	64.45	206.24	154.68	309.36	373.81	2242.86	AT33	B
AT	AT331	ATAG_7-7830402	ATTP_7-7830402	Stanzach	47.3971	10.5754	19000	12172	YES	76.075	243.44	182.58	365.16	441.235	2647.41	AT33	C
AT	AT335	ATAG_7-7403201	ATTP_7-7403201	Fieberbrunn	47.4963	12.4919	19000	12650	YES	79.0625	253	189.75	379.5	458.562	2751.37	AT33	C
AT	AT332	ATAG_7-7355306	ATTP_7-7355306	Steinach	47.0982	11.466	20000	8002	YES	50.0125	160.04	120.03	240.06	290.072	1740.43	AT33	A
AT	AT334	ATAG_7-7208605	ATTP_7-7208605	Längenfeld	47.1055	10.9542	20000	9570	YES	59.8125	191.4	143.55	287.1	346.912	2081.47	AT33	B
AT	AT331	ATAG_7-7829403	ATTP_7-7829403	Schattwald	47.5243	10.4528	20100	16553	YES	103.456	331.06	248.295	496.59	600.046	3600.28	AT33	B
AT	AT334	ATAG_7-7218603	ATTP_7-7218603	Sautens	47.2151	10.8623	20200	19256	YES	120.35	385.12	288.84	577.68	698.03	4188.18	AT33	A
AT	AT334	ATAG_7-7629506	ATTP_7-7629506	Tösens	47.0359	10.6293	20500	13416	YES	83.85	268.32	201.24	402.48	486.33	2917.98	AT33	C
AT	AT335	ATAG_7-7412203	ATTP_7-7412203	Kössen	47.675	12.3967	21000	11286	YES	70.5375	225.72	169.29	338.58	409.118	2454.7	AT33	B
AT	AT331	ATAG_7-7807404	ATTP_7-7807404	Ehrwald	47.4222	10.9184	24500	13793	YES	86.2062	275.86	206.895	413.79	499.996	2999.98	AT33	C
AT	AT332	ATAG_7-7351308	ATTP_7-7351308	Seefeld	47.3414	11.1972	26000	13036	NO	81.475	0	0	0	472.555	2835.33	AT33	A
AT	AT334	ATAG_7-7224609	ATTP_7-7224609	Wenns	47.1735	10.7401	27500	8989	YES	56.1813	179.78	134.835	269.67	325.851	1955.11	AT33	B
AT	AT335	ATAG_7-7420206	ATTP_7-7420206	Westendorf	47.4352	12.1927	28000	12325	YES	77.0312	246.5	184.875	369.75	446.781	2680.69	AT33	C
AT	AT334	ATAG_7-7619503	ATTP_7-7619503	Prutz	47.092	10.668	28000	16526	YES	103.288	330.52	247.89	495.78	599.067	3594.4	AT33	C
AT	AT334	ATAG_7-7630501	ATTP_7-7630501	Zams	47.1685	10.5958	33000	30843	YES	192.769	616.86	462.645	925.29	1118.06	6708.35	AT33	A
AT	AT335	ATAG_7-7526104	ATTP_7-7526104	Söll	47.5198	12.1972	35000	17400	YES	108.75	348	261	522	630.75	3784.5	AT33	C
AT	AT333	ATAG_7-7717704	ATTP_7-7717704	Huben	46.9232	12.5925	37000	17203	YES	107.519	344.06	258.045	516.09	623.609	3741.65	AT33	C
AT	AT334	ATAG_7-7605502	ATTP_7-7605502	Flirsch	47.1344	10.4218	38000	16665	YES	104.156	333.3	249.975	499.95	604.106	3624.64	AT33	B
AT	AT335	ATAG_7-7404205	ATTP_7-7404205	Going	47.5189	12.3676	39470	24286	YES	151.787	485.72	364.29	728.58	880.367	5282.2	AT33	A
AT	AT335	ATAG_7-7520101	ATTP_7-7520101	Radfeld	47.4587	11.9318	40000	36826	YES	230.163	736.52	552.39	1104.78	1334.94	8009.65	AT33	C
AT	AT332	ATAG_7-7356304	ATTP_7-7356304	Stubaital	47.1592	11.3613	40000	33911	NO	211.944	0	0	0	1229.27	7375.64	AT33	B
AT	AT332	ATAG_7-7357321	ATTP_7-7357321	Telfs	47.3123	11.1113	40000	36084	YES	225.525	721.68	541.26	1082.52	1308.04	7848.27	AT33	A
AT	AT334	ATAG_7-7221602	ATTP_7-7221602	Stams	47.2849	10.9882	41000	27376	YES	171.1	547.52	410.64	821.28	992.38	5954.28	AT33	A
AT	AT334	ATAG_7-7203601	ATTP_7-7203601	Imst	47.2192	10.751	46000	40107	YES	250.669	802.14	601.605	1203.21	1453.88	8723.27	AT33	A
AT	AT335	ATAG_7-7411204	ATTP_7-7411204	Kitzbühel	47.4647	12.3841	46550	20511	YES	128.194	410.22	307.665	615.33	743.524	4461.14	AT33	A
AT	AT335	ATAG_7-7513103	ATTP_7-7513103	Kufstein	47.604	12.188	49700	42509	YES	265.681	850.18	637.635	1275.27	1540.95	9245.71	AT33	A
AT	AT334	ATAG_7-7608504	ATTP_7-7608504	Ischgl	47.0248	10.3078	50000	24732	YES	154.575	494.64	370.98	741.96	896.535	5379.21	AT33	C
AT	AT313	ATAG_4-40608002	ATTP_4-40608002	Königswiesen	48.395	14.8282	5000	2915	NO	18.2188	0	0	0	105.669	634.012	AT31	C
AT	AT311	ATAG_4-41425002	ATTP_4-41425002	Suben-St.Marienkirchen	48.4073	13.4353	5500	4877	NO	30.4813	0	0	0	176.791	1060.75	AT31	A
AT	AT313	ATAG_4-41627001	ATTP_4-41627001	Mittleres Rodltal	48.4591	14.2671	5500	5658	NO	35.3625	0	0	0	205.103	1230.62	AT31	A
AT	AT311	ATAG_4-40811002	ATTP_4-40811002	Mittleres Trattnachtal	48.2241	13.7346	5625	3941	NO	24.6312	0	0	0	142.861	857.168	AT31	A
AT	AT311	ATAG_4-40816001	ATTP_4-40816001	Natternbach-Neukirchen-Eschenau	48.3846	13.754	6000	4199	NO	26.2438	0	0	0	152.214	913.283	AT31	C
AT	AT311	ATAG_4-40433001	ATTP_4-40433001	Polling und Umgebung	48.2319	13.2722	6300	3973	NO	24.8313	0	0	0	144.021	864.128	AT31	B
AT	AT315	ATAG_4-41701001	ATTP_4-41701001	Ampflwang	48.0693	13.5699	6600	4427	NO	27.6688	0	0	0	160.479	962.873	AT31	C
AT	AT311	ATAG_4-40806002	ATTP_4-40806002	Gaspoltshofen	48.1559	13.765	6700	3366	NO	21.0375	0	0	0	122.018	732.105	AT31	C
AT	AT313	ATAG_4-41342001	ATTP_4-41342001	Ulrichsberg	48.6645	13.9296	6700	7686	NO	48.0375	0	0	0	278.617	1671.7	AT31	C
AT	AT333	ATAG_7-7707701	ATTP_7-7707701	Dölsach	46.8133	12.8362	56800	45621	YES	285.131	912.42	684.315	1368.63	1653.76	9922.57	AT33	A
AT	AT332	ATAG_7-7369303	ATTP_7-7369303	Zirl	47.2649	11.2889	61500	51449	YES	321.556	1028.98	771.735	1543.47	1865.03	11190.2	AT33	C
AT	AT335	ATAG_7-7410202	ATTP_7-7410202	Kirchdorf	47.5957	12.4737	70000	29051	YES	181.569	581.02	435.765	871.53	1053.1	6318.59	AT33	C
AT	AT331	ATAG_7-7833401	ATTP_7-7833401	Vils	47.554	10.6583	71670	65476	YES	409.225	1309.52	982.14	1964.28	2373.5	14241	AT33	C
AT	AT334	ATAG_7-7220607	ATTP_7-7220607	Sölden	46.9917	11.0125	75000	22056	YES	137.85	441.12	330.84	661.68	799.53	4797.18	AT33	C
AT	AT335	ATAG_7-7926110	ATTP_7-7926110	Schwaz	47.3626	11.7256	85000	65631	YES	410.194	1312.62	984.465	1968.93	2379.12	14274.7	AT33	A
AT	AT335	ATAG_7-7511102	ATTP_7-7511102	Kirchbichl	47.5349	12.1086	100000	70681	YES	441.756	1413.62	1060.21	2120.43	2562.19	15373.1	AT33	C
AT	AT332	ATAG_7-7309302	ATTP_7-7309302	Fritzens	47.3051	11.6085	120000	73092	YES	456.825	1461.84	1096.38	2192.76	2649.59	15897.5	AT33	C
AT	AT335	ATAG_7-7930111	ATTP_7-7930111	Strass	47.4026	11.8354	167000	151735	YES	948.344	3034.7	2276.03	4552.05	5500.39	33002.4	AT33	A
AT	AT332	ATAG_7-7101301	ATTP_7-7101301	Innsbruck	47.2637	11.4466	400000	281657	YES	1760.36	5633.14	4224.85	8449.71	10210.1	61260.4	AT33	A
AT	AT311	ATAG_4-41402001	ATTP_4-41402001	Andorf	48.3816	13.5701	6850	5153	NO	32.2063	0	0	0	186.796	1120.78	AT31	B
AT	AT313	ATAG_4-40620001	ATTP_4-40620001	Kettenbach I	48.3222	14.6301	7000	3749	NO	23.4313	0	0	0	135.901	815.407	AT31	A
AT	AT313	ATAG_4-41105004	ATTP_4-41105004	Grein	48.2318	14.8752	7500	3587	NO	22.4187	0	0	0	130.029	780.172	AT31	B
AT	AT313	ATAG_4-41106001	ATTP_4-41106001	Mittlere Gusen Lungitz	48.2935	14.4759	7700	6857	NO	42.8562	0	0	0	248.566	1491.4	AT31	C
AT	AT315	ATAG_4-41726001	ATTP_4-41726001	Pöndorf	47.9871	13.3851	7850	7314	NO	45.7125	0	0	0	265.133	1590.8	AT31	A
AT	AT311	ATAG_4-41204001	ATTP_4-41204001	Eberschwang	48.1671	13.5579	8000	4943	NO	30.8938	0	0	0	179.184	1075.1	AT31	B
AT	AT311	ATAG_4-40422002	ATTP_4-40422002	Mauerkirchen	48.1977	13.1248	8000	5657	NO	35.3563	0	0	0	205.066	1230.4	AT31	A
AT	AT314	ATAG_4-40909001	ATTP_4-40909001	Molln	47.8941	14.2553	8000	4233	NO	26.4563	0	0	0	153.446	920.677	AT31	A
AT	AT311	ATAG_4-41426001	ATTP_4-41426001	Pram-Pfudabach	48.4126	13.52	8000	5284	NO	33.025	0	0	0	191.545	1149.27	AT31	A
AT	AT314	ATAG_4-41505001	ATTP_4-41505001	Gaflenztal	47.8527	14.6432	8200	5400	NO	33.75	0	0	0	195.75	1174.5	AT31	A
AT	AT314	ATAG_4-40903001	ATTP_4-40903001	Hinterstoder	47.7088	14.1651	9000	4220	NO	26.375	0	0	0	152.975	917.85	AT31	B
AT	AT313	ATAG_4-41303001	ATTP_4-41303001	Aigen-Schlögl	48.6328	13.9749	9000	5415	NO	33.8438	0	0	0	196.294	1177.76	AT31	B
AT	AT311	ATAG_4-40402001	ATTP_4-40402001	Aspach	48.1903	13.3009	9500	7160	NO	44.75	0	0	0	259.55	1557.3	AT31	A
AT	AT311	ATAG_4-41430001	ATTP_4-41430001	Mittleres Pramtal	48.3195	13.6295	9500	10104	NO	63.15	0	0	0	366.27	2197.62	AT31	A
AT	AT311	ATAG_4-40406001	ATTP_4-40406001	Eggelsberg	48.0705	12.9807	9522	5157	NO	32.2313	0	0	0	186.941	1121.65	AT31	B
AT	AT311	ATAG_4-40428001	ATTP_4-40428001	Salzach-Mitte	48.0439	12.8249	10000	7028	NO	43.925	0	0	0	254.765	1528.59	AT31	A
AT	AT313	ATAG_4-41603002	ATTP_4-41603002	Bad Leonfelden	48.4942	14.3013	10000	10183	NO	63.6438	0	0	0	369.134	2214.8	AT31	C
CZ	CZ020		CZ2101-772399-00232904-4/1U	COV Tynec nad Sazavou	49.8344	14.5826	6600	2862	NO	17.8875	0	0	0	103.747	622.485	CZ02	A
CZ	CZ020		CZ2102-602868-46356975-4/1U	COV Beroun	49.9586	14.0939	35783	28160	NO	176	0	0	0	1020.8	6124.8	CZ02	B
CZ	CZ020		CZ2103-609170-00240079-4/1U	COV Brandys nad Labem - Stara Boleslav	50.1936	14.6623	20000	10900	NO	68.125	0	0	0	395.125	2370.75	CZ02	B
CZ	CZ020		CZ2103-619159-00240117-4/1U	COV Celakovice	50.1692	14.7357	10475	8381	NO	52.3813	0	0	0	303.811	1822.87	CZ02	B
CZ	CZ020		CZ2103-702404-00240524-4/1U	COV Nehvizdy	50.1361	14.7373	6000	2465	NO	15.4062	0	0	0	89.3563	536.137	CZ02	B
CZ	CZ020		CZ2103-708992-00240559-4/1U	COV Odolena Voda	50.2402	14.4135	6000	4931	NO	30.8187	0	0	0	178.749	1072.49	CZ02	B
CZ	CZ020		CZ2103-775738-00240931-4/1U	COV Uvaly	50.0829	14.7197	6048	4192	NO	26.2	0	0	0	151.96	911.76	CZ02	A
CZ	CZ020		CZ2104-618349-46356967-4/1U	COV Caslav	49.9251	15.395	15000	8157	NO	50.9812	0	0	0	295.691	1774.15	CZ02	A
CZ	CZ020		CZ2105-620386-00241121-4/1U	COV Cernosice	49.9661	14.3297	7500	5891	NO	36.8188	0	0	0	213.549	1281.29	CZ02	A
CZ	CZ020		CZ2105-627810-00241181-4/1U	COV Dobrichovice	49.9322	14.2887	7333	11766	NO	73.5375	0	0	0	426.517	2559.1	CZ02	A
CZ	CZ020		CZ2105-645834-00241237-4/1U	COV Hostivice	50.0788	14.2664	9670	8110	NO	50.6875	0	0	0	293.988	1763.93	CZ02	A
CZ	CZ020		CZ2105-655465-00241296-4/1U	COV Chyne	50.065	14.2369	6000	3138	NO	19.6125	0	0	0	113.752	682.515	CZ02	A
CZ	CZ020		CZ2105-658618-00241318-4/1U	COV Jesenice	49.9726	14.514	7500	5504	NO	34.4	0	0	0	199.52	1197.12	CZ02	A
CZ	CZ020		CZ2105-660094-00241326-4/1U	COV Jilove u Prahy	49.889	14.497	6500	4645	NO	29.0312	0	0	0	168.381	1010.29	CZ02	B
CZ	CZ020		CZ2105-697621-00242748-4/1U	COV Mnisek pod Brdy	49.8699	14.2785	6000	7927	NO	49.5437	0	0	0	287.354	1724.12	CZ02	A
CZ	CZ020		CZ2105-733962-00241563-4/1U	COV Pruhonice	50.0158	14.5539	7000	4573	NO	28.5813	0	0	0	165.771	994.627	CZ01	A
CZ	CZ020		CZ2105-736422-00241580-4/1U	COV Psary	49.9356	14.5098	6000	5549	NO	34.6812	0	0	0	201.151	1206.91	CZ02	A
CZ	CZ020		CZ2105-742503-00241610-4/1U	COV Roztoky u Prahy	50.1586	14.4003	20000	12740	NO	79.625	0	0	0	461.825	2770.95	CZ02	A
CZ	CZ020		CZ2105-743313-00233773-4/1U	COV Rudna - Horelice	50.0229	14.2179	9200	5249	NO	32.8062	0	0	0	190.276	1141.66	CZ02	A
CZ	CZ020		CZ2105-781029-00507644-4/1U	COV Vestec	49.99	14.5	7340	6575	NO	41.0938	0	0	0	238.344	1430.06	CZ02	B
CZ	CZ020		CZ2106-622826-00235334-4/1U	COV Cesky Brod	50.0805	14.8854	9461	8718	NO	54.4875	0	0	0	316.028	1896.17	CZ02	B
CZ	CZ020		CZ2107-627968-00242098-4/1U	COV Dobris	49.7839	14.1882	13000	8844	NO	55.275	0	0	0	320.595	1923.57	CZ02	B
CZ	CZ020		CZ2108-645371-46356975-4/1U	COV Horovice	49.8474	13.9138	20000	6621	NO	41.3813	0	0	0	240.011	1440.07	CZ02	B
CZ	CZ020		CZ2109-665177-46356991-4/1U	COV Kladno - Vrapice	50.1669	14.1741	86333	97839	YES	611.494	1956.78	1467.59	2935.17	3546.66	21280	CZ02	C
CZ	CZ020		CZ2109-755567-46356991-4/1U	COV Stochov	50.1377	13.9682	5250	5420	NO	33.875	0	0	0	196.475	1178.85	CZ02	A
CZ	CZ020		CZ2109-764558-00234516-4/1U	COV Kladno - Svermov	50.1721	14.1244	6616	5498	NO	34.3625	0	0	0	199.303	1195.82	CZ02	B
CZ	CZ051		CZ5105-647390-49099469-4/1U	COV Hradek nad Nisou	50.8549	14.8325	7854	7400	NO	46.25	0	0	0	268.25	1609.5	CZ05	B
CZ	CZ051		CZ5105-682209-49099469-4/1U	COV Liberec	50.7809	15.0328	190333	187089	YES	1169.31	3741.78	2806.34	5612.67	6781.98	40691.9	CZ05	A
CZ	CZ051		CZ5106-707155-49099469-4/1U	COV Novy Bor	50.7503	14.5403	13400	7975	NO	49.8438	0	0	0	289.094	1734.56	CZ05	B
CZ	CZ051		CZ5107-686751-49295934-4/1U	COV Lomnice nad Popelkou	50.5258	15.3866	5500	5318	NO	33.2375	0	0	0	192.778	1156.66	CZ05	B
CZ	CZ051		CZ5107-747271-00276111-4/1U	COV Semily	50.6147	15.316	13333	6317	NO	39.4813	0	0	0	228.991	1373.95	CZ05	A
CZ	CZ051		CZ5108-778753-49099469-4/2U	COV Tanvald	50.7325	15.3142	9037	3575	NO	22.3438	0	0	0	129.594	777.562	CZ05	B
CZ	CZ051		CZ5109-771601-49295934-4/1U	COV Turnov	50.5798	15.1478	20000	16309	NO	101.931	0	0	0	591.201	3547.21	CZ05	A
CZ	CZ051		CZ5110-796221-49099469-4/1U	COV zelezny Brod	50.6403	15.243	7566	2109	NO	13.1813	0	0	0	76.4512	458.707	CZ05	A
CZ	CZ052		CZ5201-612766-00272523-4/1U	COV Broumov	50.5697	16.343	25167	11550	NO	72.1875	0	0	0	418.688	2512.12	CZ05	B
CZ	CZ052		CZ5202-627534-00274879-4/1U	COV Dobruska	50.2962	16.1249	10000	26871	NO	167.944	0	0	0	974.074	5844.44	CZ05	A
CZ	CZ052		CZ5202-711951-00275191-4/1U	COV Opocno	50.269	16.0826	8200	4642	NO	29.0125	0	0	0	168.272	1009.63	CZ05	C
CZ	CZ052		CZ5203-633968-26891395-4/1U	COV Dvur Kralove nad Labem	50.4239	15.8207	88000	12760	YES	79.75	255.2	191.4	382.8	462.55	2775.3	CZ05	A
CZ	CZ052		CZ5204-645168-60109149-4/1U	COV Horice	50.3549	15.6259	16700	8641	NO	54.0063	0	0	0	313.236	1879.42	CZ05	B
CZ	CZ052		CZ5205-651800-48172898-4/1U	COV Chlumec nad Cidlinou	50.1467	15.4612	5496	3903	NO	24.3938	0	0	0	141.484	848.902	CZ05	B
CZ	CZ052		CZ5205-726583-48172898-4/1U	COV Hradec Kralove	50.179	15.8164	141666	96899	YES	605.619	1937.98	1453.48	2906.97	3512.59	21075.5	CZ05	A
CZ	CZ052		CZ5206-657336-00272728-4/1U	COV Jaromer	50.337	15.9111	35000	8290	NO	51.8125	0	0	0	300.512	1803.08	CZ05	B
CZ	CZ052		CZ5207-659541-60109149-4/1U	COV Jicin	50.4201	15.3568	35000	25004	YES	156.275	500.08	375.06	750.12	906.395	5438.37	CZ05	A
CZ	CZ020		CZ2118-745928-46357009-4/1U	COV Sadska	50.1528	14.9767	5066	2247	NO	14.0438	0	0	0	81.4537	488.723	CZ02	C
CZ	CZ020		CZ2119-693286-46357009-4/1U	COV Mestec Kralove	50.2031	15.2814	5200	2712	NO	16.95	0	0	0	98.31	589.86	CZ02	A
CZ	CZ020		CZ2119-723495-00239640-4/1U	COV Podebrady	50.1546	15.1079	25000	60886	YES	380.537	1217.72	913.29	1826.58	2207.12	13242.7	CZ02	A
CZ	CZ020		CZ2120-614271-00242004-4/1U	COV Breznice	49.5477	13.9688	8500	3918	NO	24.4875	0	0	0	142.028	852.165	CZ02	C
CZ	CZ020		CZ2120-735426-00243132-4/1U	COV Pribram	49.7052	14.0088	76300	37353	YES	233.456	747.06	560.295	1120.59	1354.05	8124.28	CZ02	A
CZ	CZ020		CZ2120-742848-00243221-4/1U	COV Rozmital pod TremSinem	49.5969	13.8778	6000	2502	NO	15.6375	0	0	0	90.6975	544.185	CZ02	A
CZ	CZ020		CZ2121-706744-00244155-4/1U	COV Nove Straseci	50.1529	13.9114	5500	4371	NO	27.3187	0	0	0	158.449	950.692	CZ02	A
CZ	CZ020		CZ2121-739081-47019549-4/1U	COV Rakovnik	50.0933	13.7504	23000	29329	NO	183.306	0	0	0	1063.18	6379.06	CZ02	A
CZ	CZ020		CZ2122-745456-00240702-4/1U	COV Ricany u Prahy	50.0052	14.6437	16158	14171	NO	88.5688	0	0	0	513.699	3082.19	CZ02	B
CZ	CZ020		CZ2122-779342-45357366-4/1U	COV Velke Popovice - centralni	49.915	14.6411	945000	45281	NO	283.006	0	0	0	1641.44	9848.62	CZ02	B
CZ	CZ020		CZ2123-746533-00243272-4/1U	COV SedlCany	49.6749	14.4299	23000	17109	YES	106.931	342.18	256.635	513.27	620.201	3721.21	CZ02	C
CZ	CZ020		CZ2124-749362-00234877-4/1U	COV Slany - Blahotice	50.234	14.1096	19083	9417	NO	58.8562	0	0	0	341.366	2048.2	CZ02	B
CZ	CZ020		CZ2125-783544-00232947-4/1U	COV Vlasim	49.714	14.9068	12900	15992	NO	99.95	0	0	0	579.71	3478.26	CZ02	A
CZ	CZ020		CZ2126-785041-00232963-4/1U	COV Votice	49.6533	14.6324	5500	10515	NO	65.7188	0	0	0	381.169	2287.01	CZ02	C
CZ	CZ031		CZ3101-605247-00250996-4/1U	COV Blatna	49.4147	13.902	7500	3742	NO	23.3875	0	0	0	135.648	813.885	CZ03	C
CZ	CZ031		CZ3102-648001-00244732-4/1U	COV Ceske Budejovice	49.0154	14.4573	375000	139536	YES	872.1	2790.72	2093.04	4186.08	5058.18	30349.1	CZ03	A
CZ	CZ031		CZ3103-622931-28160363-4/1U	COV Cesky Krumlov	48.781	14.2972	460000	40261	YES	251.631	805.22	603.915	1207.83	1459.46	8756.77	CZ03	A
CZ	CZ031		CZ3103-643700-00245895-4/2U	COV Horni Plana	48.761	14.0303	6600	2416	NO	15.1	0	0	0	87.58	525.48	CZ03	A
CZ	CZ031		CZ3104-624403-00246476-4/1U	COV Dacice	49.073	15.4215	9400	3974	NO	24.8375	0	0	0	144.058	864.345	CZ03	B
CZ	CZ031		CZ3104-758191-00247545-4/1U	COV Studena	49.1903	15.2903	5200	4516	NO	28.225	0	0	0	163.705	982.23	CZ03	A
CZ	CZ031		CZ3105-660523-00246875-4/1U	COV Jindrichuv Hradec	49.1283	15.0112	87500	56529	YES	353.306	1130.58	847.935	1695.87	2049.18	12295.1	CZ03	A
CZ	CZ031		CZ3106-663140-00245941-4/1U	COV Kaplice	48.729	14.5057	12650	11501	NO	71.8813	0	0	0	416.911	2501.47	CZ03	B
CZ	CZ031		CZ3106-777854-00246174-4/1U	COV Velesin - stabilizacni nadrz	48.8285	14.4717	6200	2482	NO	15.5125	0	0	0	89.9725	539.835	CZ03	B
CZ	CZ031		CZ3107-694673-00249831-4/1U	COV Milevsko	49.4394	14.3915	14500	4644	NO	29.025	0	0	0	168.345	1010.07	CZ03	A
CZ	CZ031		CZ3108-720755-00249998-4/1U	COV Pisek	49.3192	14.1532	62833	36145	YES	225.906	722.9	542.175	1084.35	1310.26	7861.54	CZ03	A
CZ	CZ031		CZ3108-733857-00250023-4/1U	COV Protivin	49.2054	14.2195	49200	22809	NO	142.556	0	0	0	826.826	4960.96	CZ03	A
CZ	CZ031		CZ3109-732630-00250627-4/1U	COV Prachatice	49.0218	14.0123	33000	7847	YES	49.0437	156.94	117.705	235.41	284.454	1706.72	CZ03	A
CZ	CZ031		CZ3109-784737-00250830-4/1U	COV Volary	48.9171	13.8902	7200	1329	NO	8.30625	0	0	0	48.1762	289.057	CZ03	B
CZ	CZ031		CZ3110-751707-00252921-4/1U	COV Sobeslav	49.2685	14.7001	9300	4426	NO	27.6625	0	0	0	160.442	962.655	CZ03	B
CZ	CZ031		CZ3110-780685-00253081-4/1U	COV Veseli nad Luznici	49.2038	14.7147	15000	19815	NO	123.844	0	0	0	718.294	4309.76	CZ03	A
CZ	CZ031		CZ3111-755915-00251810-4/1U	COV Strakonice	49.2631	13.9232	75000	27430	YES	171.438	548.6	411.45	822.9	994.337	5966.02	CZ03	A
CZ	CZ031		CZ3111-784958-00252000-4/1U	COV Volyne	49.1744	13.8883	7500	2674	NO	16.7125	0	0	0	96.9325	581.595	CZ03	B
CZ	CZ031		CZ3112-601543-00252069-4/1U	COV Bechyne	49.296	14.4745	7500	4446	NO	27.7875	0	0	0	161.167	967.005	CZ03	A
CZ	CZ031		CZ3112-619418-26069539-4/1U	COV Tabor - ACOV	49.4003	14.6786	95000	93550	YES	584.688	1871	1403.25	2806.5	3391.19	20347.1	CZ03	B
CZ	CZ031		CZ3112-666513-26069539-4/1U	COV Tabor - Klokoty	49.4111	14.6388	30000	14570	YES	91.0625	291.4	218.55	437.1	528.162	3168.97	CZ03	B
CZ	CZ031		CZ3113-607746-00244686-4/1U	COV Borovany	48.8871	14.6411	9500	1292	NO	8.075	0	0	0	46.835	281.01	CZ03	B
CZ	CZ031		CZ3114-615021-00247618-4/1U	COV Trebon	49.0326	14.7554	16410	21525	NO	134.531	0	0	0	780.281	4681.69	CZ03	A
CZ	CZ031		CZ3115-772127-00245585-4/1U	COV Tyn nad Vltavou	49.2291	14.4049	6000	5031	NO	31.4437	0	0	0	182.374	1094.24	CZ03	B
CZ	CZ031		CZ3116-782084-00250805-4/1U	COV Vimperk	49.0652	13.7824	9800	3086	NO	19.2875	0	0	0	111.868	671.205	CZ03	A
CZ	CZ031		CZ3117-784281-00251984-4/1U	COV Vodnany	49.1421	14.1906	28500	11584	NO	72.4	0	0	0	419.92	2519.52	CZ03	A
CZ	CZ032		CZ3202-630853-00253316-4/1U	COV Domazlice	49.4322	12.9605	34000	16605	YES	103.781	332.1	249.075	498.15	601.931	3611.59	CZ03	A
CZ	CZ032		CZ3202-732851-00253464-4/1U	COV Kdyne - jih	49.3891	13.0267	5000	3904	NO	24.4	0	0	0	141.52	849.12	CZ03	B
CZ	CZ032		CZ3203-641855-00255513-4/1U	COV Horazdovice	49.3178	13.719	9500	2919	NO	18.2438	0	0	0	105.814	634.883	CZ03	A
CZ	CZ032		CZ3204-644871-00253383-4/1U	COV Horsovsky Tyn	49.5329	12.9615	11818	3942	NO	24.6375	0	0	0	142.898	857.385	CZ03	B
CZ	CZ032		CZ3205-665797-00255661-4/1U	COV Klatovy	49.4117	13.2693	100000	83516	YES	521.975	1670.32	1252.74	2505.48	3027.45	18164.7	CZ03	A
CZ	CZ032		CZ3205-708453-00255921-4/1U	COV Nyrsko	49.3005	13.1492	8000	4767	NO	29.7938	0	0	0	172.804	1036.82	CZ03	B
CZ	CZ032		CZ3206-672645-00257966-4/1U	COV Kralovice	49.9789	13.492	9900	3873	NO	24.2063	0	0	0	140.396	842.377	CZ03	A
CZ	CZ032		CZ3207-703478-00256986-4/1U	COV Nepomuk	49.4928	13.581	7500	1768	NO	11.05	0	0	0	64.09	384.54	CZ03	B
CZ	CZ064		CZ6204-723835-49455168-4/1U	COV Podivin	48.8232	16.852	5250	2807	NO	17.5437	0	0	0	101.754	610.522	CZ06	A
CZ	CZ064		CZ6204-776696-49455168-4/1U	COV Valtice	48.7485	16.751	9700	5545	NO	34.6562	0	0	0	201.006	1206.04	CZ06	A
CZ	CZ064		CZ6204-778672-00283673-4/1U	COV Velke Bilovice	48.8558	16.8776	8000	4716	NO	29.475	0	0	0	170.955	1025.73	CZ06	A
CZ	CZ064		CZ6205-615161-49454587-4/1U	COV Bucovice	49.1516	16.9824	9860	19183	NO	119.894	0	0	0	695.384	4172.3	CZ06	A
CZ	CZ064		CZ6206-633585-00284882-4/1U	COV Dubnany	48.9136	17.086	6500	5237	NO	32.7313	0	0	0	189.841	1139.05	CZ06	A
CZ	CZ032		CZ3208-683850-00258059-4/1U	COV Line	49.699	13.2661	5475	3477	NO	21.7312	0	0	0	126.041	756.247	CZ03	B
CZ	CZ032		CZ3208-767557-49745221-4/1U	COV Sdruzeni obci Tlucna. Vejprnice. Nyrany	49.726	13.2527	9900	9485	NO	59.2812	0	0	0	343.831	2062.99	CZ03	A
CZ	CZ032		CZ3209-721981-00075370-4/1U	COV Plzen	49.7646	13.4063	427917	352374	YES	2202.34	7047.48	5285.61	10571.2	12773.6	76641.3	CZ03	A
CZ	CZ032		CZ3209-755150-00257257-4/1U	COV Stary Plzenec - II centralni	49.6985	13.4797	8000	9308	NO	58.175	0	0	0	337.415	2024.49	CZ03	A
CZ	CZ032		CZ3210-735256-00257125-4/1U	COV Prestice	49.5753	13.3457	8200	4781	NO	29.8812	0	0	0	173.311	1039.87	CZ03	B
CZ	CZ032		CZ3211-740691-00259047-4/1U	COV Rokycany	49.7456	13.5809	25000	8915	YES	55.7188	178.3	133.725	267.45	323.169	1939.01	CZ03	A
CZ	CZ032		CZ3212-627615-00256552-4/1U	COV Dobrany	49.6609	13.2979	9600	4686	NO	29.2875	0	0	0	169.867	1019.2	CZ03	B
CZ	CZ032		CZ3212-641553-00253367-4/1U	COV Holysov	49.5999	13.0968	7000	3679	NO	22.9938	0	0	0	133.364	800.183	CZ03	A
CZ	CZ032		CZ3212-755516-00257265-4/1U	COV Stod	49.6418	13.1715	5000	4550	NO	28.4375	0	0	0	164.938	989.625	CZ03	A
CZ	CZ032		CZ3213-757837-47700521-4/1U	COV Stribro	49.7507	13.0066	15500	18398	NO	114.988	0	0	0	666.928	4001.57	CZ03	A
CZ	CZ032		CZ3214-759601-00256129-4/1U	COV Susice	49.2531	13.5521	13500	12934	NO	80.8375	0	0	0	468.858	2813.15	CZ03	A
CZ	CZ032		CZ3215-652211-47700521-4/1U	COV Chodova Plana	49.8914	12.7202	13700	4633	NO	28.9563	0	0	0	167.946	1007.68	CZ03	B
CZ	CZ032		CZ3215-721280-00260096-4/1U	COV Plana	49.8607	12.7403	5950	3421	NO	21.3812	0	0	0	124.011	744.067	CZ03	A
CZ	CZ032		CZ3215-764914-47700521-4/1U	COV Tachov	49.7942	12.6558	11578	21352	NO	133.45	0	0	0	774.01	4644.06	CZ03	A
CZ	CZ041		CZ4101-600521-49787977-4/1U	COV As	50.2377	12.1864	25000	22419	NO	140.119	0	0	0	812.689	4876.13	CZ04	C
CZ	CZ041		CZ4102-651028-49787977-4/1U	COV Cheb	50.0869	12.3917	65000	32589	YES	203.681	651.78	488.835	977.67	1181.35	7088.11	CZ04	A
CZ	CZ041		CZ4103-634522-00254801-4/1U	COV Nejdek	50.3079	12.7547	8150	8820	NOT KNOWN	55.125	0	0	0	319.725	1918.35	CZ04	B
CZ	CZ041		CZ4103-663701-47700521-4/1U	COV Karlovy Vary - Drahonovice	50.2394	12.8979	80000	58895	YES	368.094	1177.9	883.425	1766.85	2134.94	12809.7	CZ04	A
CZ	CZ041		CZ4103-705250-47700521-4/1U	COV Nova Role	50.2707	12.7922	5000	3755	NO	23.4688	0	0	0	136.119	816.712	CZ04	A
CZ	CZ041		CZ4104-673293-25241800-4/1U	COV Kraslice	50.314	12.521	12000	3451	NO	21.5687	0	0	0	125.099	750.592	CZ04	A
CZ	CZ041		CZ4104-741531-00259551-4/1U	COV Rotava	50.315	12.5649	5000	1822	NO	11.3875	0	0	0	66.0475	396.285	CZ04	C
CZ	CZ041		CZ4105-765961-47700521-4/1U	COV Tepla	49.9797	12.858	5000	1245	NO	7.78125	0	0	0	45.1312	270.787	CZ04	B
CZ	CZ041		CZ4105-901903-49787977-4/1U	COV Marianske Lazne	49.9351	12.7253	16807	20304	NO	126.9	0	0	0	736.02	4416.12	CZ04	C
CZ	CZ041		CZ4106-656437-47700521-4/1U	COV Jachymov	50.3547	12.9326	11400	5810	NO	36.3125	0	0	0	210.612	1263.67	CZ04	B
CZ	CZ041		CZ4106-715883-47700521-4/1U	COV Ostrov	50.3033	12.9661	21652	15054	NO	94.0875	0	0	0	545.707	3274.24	CZ04	A
CZ	CZ041		CZ4107-636339-49163451-4/1U	COV Habartov a Bukovany	50.1742	12.5576	5600	2961	NO	18.5063	0	0	0	107.336	644.017	CZ04	C
CZ	CZ041		CZ4107-644056-47700521-4/1U	COV Horni Slavkov	50.1429	12.8005	9350	8014	NO	50.0875	0	0	0	290.507	1743.04	CZ04	A
CZ	CZ041		CZ4107-652172-47700521-4/1U	COV Chodov	50.2363	12.7518	14697	15381	NO	96.1313	0	0	0	557.561	3345.37	CZ04	A
CZ	CZ041		CZ4107-752223-00259586-4/1U	COV Sokolov	50.1819	12.6711	33000	16165	YES	101.031	323.3	242.475	484.95	585.981	3515.89	CZ04	A
CZ	CZ020		CZ2115-602124-46356983-4/1U	COV Benatky nad Jizerou	50.2852	14.8174	9900	6620	NO	41.375	0	0	0	239.975	1439.85	CZ02	A
CZ	CZ020		CZ2115-696641-46356983-4/1U	COV Mlada Boleslav - Neuberk	50.4236	14.8946	40000	36713	YES	229.456	734.26	550.695	1101.39	1330.85	7985.08	CZ02	A
CZ	CZ020		CZ2115-900125-46356983-4/1U	COV Mlada Boleslav - Podlazky	50.4244	14.8941	50367	35668	YES	222.925	713.36	535.02	1070.04	1292.96	7757.79	CZ02	A
CZ	CZ020		CZ2116-697575-46356983-4/1U	COV Mnichovo HradiSte	50.5105	14.965	7040	5523	NO	34.5188	0	0	0	200.209	1201.25	CZ02	A
CZ	CZ020		CZ2117-703567-45147787-4/1U	COV Neratovice Spolana	50.2799	14.5228	150000	82785	NO	517.406	0	0	0	3000.96	18005.7	CZ02	A
CZ	CZ020		CZ2118-708232-00239500-4/1U	COV Nymburk	50.1775	15.0326	25000	40333	NO	252.081	0	0	0	1462.07	8772.43	CZ02	A
CZ	CZ053		CZ5303-641146-60108631-4/1U	COV Holice	50.073	15.9768	9500	4301	NO	26.8812	0	0	0	155.911	935.467	CZ05	A
CZ	CZ053		CZ5304-638731-48171590-4/1U	COV Hermanuv Mestec	49.959	15.6796	5000	3546	NO	22.1625	0	0	0	128.542	771.255	CZ05	B
CZ	CZ053		CZ5304-653799-48171590-4/1U	COV Chrast	49.9093	15.9457	18216	3054	NO	19.0875	0	0	0	110.708	664.245	CZ05	B
CZ	CZ053		CZ5304-654299-48171590-4/1U	COV Chrudim	49.9651	15.808	50000	22715	YES	141.969	454.3	340.725	681.45	823.419	4940.51	CZ05	A
CZ	CZ053		CZ5304-749168-00270903-4/1U	COV Skutec	49.8498	15.9895	5370	3692	NO	23.075	0	0	0	133.835	803.01	CZ05	B
CZ	CZ053		CZ5304-770736-48171590-4/1U	COV Tremosnice	49.8695	15.5918	5083	5307	NO	33.1688	0	0	0	192.379	1154.27	CZ05	B
CZ	CZ053		CZ5305-620807-00278637-4/1U	COV Mlynice u Cerevene Vody	50.014	16.7453	26135	7756	NO	48.475	0	0	0	281.155	1686.93	CZ05	A
CZ	CZ053		CZ5306-678929-48173398-4/1U	COV Lanskroun	49.9024	16.6251	17750	12964	NO	81.025	0	0	0	469.945	2819.67	CZ05	A
CZ	CZ053		CZ5307-685747-00276944-4/1U	COV Litomysl	49.8825	16.2905	28000	13258	YES	82.8625	265.16	198.87	397.74	480.602	2883.61	CZ05	A
CZ	CZ053		CZ5308-693341-00276987-4/1U	COV Mestecko Trnavka	49.7143	16.7295	11075	2015	NO	12.5938	0	0	0	73.0437	438.262	CZ05	B
CZ	CZ053		CZ5308-698806-00277037-4/1U	COV Moravska Trebova	49.7529	16.7171	20070	10393	NO	64.9562	0	0	0	376.746	2260.48	CZ05	C
CZ	CZ053		CZ5309-743852-60108631-4/1U	COV Pardubice - Rybitvi - SYNTHESIA	50.0438	15.6956	191000	111278	YES	695.488	2225.56	1669.17	3338.34	4033.83	24203	CZ05	A
CZ	CZ053		CZ5310-725358-00277177-4/1U	COV Policka	49.711	16.2519	28550	25991	NO	162.444	0	0	0	942.174	5653.04	CZ05	A
CZ	CZ053		CZ5311-734560-60108631-4/1U	COV Prelouc	50.0439	15.5544	10500	5733	NO	35.8313	0	0	0	207.821	1246.93	CZ05	B
CZ	CZ053		CZ5312-647233-00277444-4/1U	COV Svitavy	49.7253	16.4767	28500	21097	YES	131.856	421.94	316.455	632.91	764.766	4588.6	CZ05	A
CZ	CZ053		CZ5313-775274-25945793-4/1U	COV Usti nad Orlici	49.9849	16.3886	22000	12655	NO	79.0938	0	0	0	458.744	2752.46	CZ05	A
CZ	CZ053		CZ5314-603236-48173398-4/1U	COV Chocen	50.0089	16.2006	27666	29228	YES	182.675	584.56	438.42	876.84	1059.51	6357.09	CZ05	C
CZ	CZ053		CZ5314-788228-00279773-4/1U	COV Vysoke Myto	49.9699	16.1453	9950	6986	NO	43.6625	0	0	0	253.243	1519.45	CZ05	C
CZ	CZ053		CZ5315-680656-48173398-4/1U	COV Letohrad	50.03	16.4912	5000	12503	NO	78.1437	0	0	0	453.234	2719.4	CZ05	A
CZ	CZ063		CZ6101-616958-43383513-4/1U	COV Bystrice nad Pernstejnem	49.5241	16.2758	15800	7915	NO	49.4688	0	0	0	286.919	1721.51	CZ06	A
CZ	CZ063		CZ6102-635537-48173002-4/1U	COV Golcuv Jenikov	49.8331	15.471	5390	2219	NO	13.8688	0	0	0	80.4387	482.632	CZ06	B
CZ	CZ063		CZ6102-637955-48173002-4/1U	COV Perknov	49.6136	15.5425	125000	75488	YES	471.8	1509.76	1132.32	2264.64	2736.44	16418.6	CZ06	A
CZ	CZ063		CZ6103-649325-00248266-4/1U	COV Humpolec	49.5574	15.3617	28200	24351	YES	152.194	487.02	365.265	730.53	882.724	5296.34	CZ06	A
CZ	CZ063		CZ6104-652831-48173002-4/1U	COV Chotebor	49.726	15.6819	8000	10927	NO	68.2938	0	0	0	396.104	2376.62	CZ06	B
CZ	CZ063		CZ6105-648698-48460915-4/1U	COV Jihlava	49.405	15.6094	99917	107301	YES	670.631	2146.02	1609.52	3219.03	3889.66	23338	CZ06	B
CZ	CZ063		CZ6105-725498-48460915-4/1U	COV Polna	49.4941	15.7119	5089	4720	NO	29.5	0	0	0	171.1	1026.6	CZ06	B
CZ	CZ063		CZ6105-770761-00286753-4/1U	COV Trest	49.2983	15.478	6700	2923	NO	18.2688	0	0	0	105.959	635.752	CZ06	A
CZ	CZ063		CZ6106-658227-60418885-4/1U	COV Jemnice	49.0121	15.5724	6000	3462	NO	21.6375	0	0	0	125.498	752.985	CZ06	A
CZ	CZ063		CZ6106-698903-60418885-4/1U	COV Moravske Budejovice	49.0615	15.8232	17600	10761	YES	67.2563	215.22	161.415	322.83	390.086	2340.52	CZ06	B
CZ	CZ042		CZ4201-604348-49099469-4/1U	COV Bilina	50.5682	13.7803	19292	18909	NO	118.181	0	0	0	685.451	4112.71	CZ04	A
CZ	CZ042		CZ4202-607169-49099469-4/1U	COV Decin - Boletice	50.7436	14.1851	68000	20301	YES	126.881	406.02	304.515	609.03	735.911	4415.47	CZ04	A
CZ	CZ042		CZ4202-621293-49099469-4/1U	COV Ceska Kamenice	50.8005	14.3966	8000	3435	NO	21.4688	0	0	0	124.519	747.112	CZ04	B
CZ	CZ042		CZ4203-660761-49099469-4/1U	COV Jirkov	50.5041	13.4608	40333	36919	YES	230.744	738.38	553.785	1107.57	1338.31	8029.88	CZ04	A
CZ	CZ042		CZ4203-772615-49099469-4/1U	COV Udlice	50.4448	13.4509	50183	75023	YES	468.894	1500.46	1125.35	2250.69	2719.58	16317.5	CZ04	A
CZ	CZ042		CZ4204-661686-49099469-4/2U	COV Kadan	50.3703	13.2804	19250	24151	NO	150.944	0	0	0	875.474	5252.84	CZ04	A
CZ	CZ042		CZ4204-665657-49099469-4/1U	COV KlaSterec nad Ohri	50.3771	13.1983	18330	19957	NO	124.731	0	0	0	723.441	4340.65	CZ04	B
CZ	CZ042		CZ4204-777579-47700521-4/1U	COV Vejprty	50.503	13.032	5067	3852	NO	24.075	0	0	0	139.635	837.81	CZ04	A
CZ	CZ042		CZ4205-685429-49099469-4/1U	COV Litomerice	50.5312	14.1188	97978	39589	YES	247.431	791.78	593.835	1187.67	1435.1	8610.61	CZ04	A
CZ	CZ042		CZ4205-763691-26161516-4/1U	COV Steti -Papirny Mondi	50.465	14.3669	567000	295479	NO	1846.74	0	0	0	10711.1	64266.7	CZ04	A
CZ	CZ063		CZ6111-679712-48173002-4/1U	COV Ledec nad Sazavou	49.6997	15.2661	6600	9064	NO	56.65	0	0	0	328.57	1971.42	CZ06	A
CZ	CZ063		CZ6111-700185-48173002-4/1U	COV Svetla nad Sazavou	49.6594	15.3749	6000	7731	NO	48.3188	0	0	0	280.249	1681.49	CZ06	C
CZ	CZ063		CZ6112-765546-00286745-4/1U	COV Telc	49.1724	15.4624	8000	7110	NO	44.4375	0	0	0	257.738	1546.42	CZ06	A
CZ	CZ063		CZ6113-657506-60418885-4/1U	COV Jaromerice nad Rokytnou	49.0913	15.9001	6965	6919	NO	43.2437	0	0	0	250.814	1504.88	CZ06	B
CZ	CZ080		CZ8119-762342-45193665-4/1U	COV Havirov	49.785	18.3932	103183	67711	YES	423.194	1354.22	1015.66	2031.33	2454.52	14727.1	CZ08	A
CZ	CZ080		CZ8120-744468-00296317-4/1U	COV Rymarov	49.9296	17.2971	14000	3335	NO	20.8438	0	0	0	120.894	725.362	CZ08	A
CZ	CZ080		CZ8121-771015-45193665-4/1U	COV Trinec	49.7127	18.6314	116250	83182	YES	519.888	1663.64	1247.73	2495.46	3015.35	18092.1	CZ08	C
CZ	CZ080		CZ8122-782998-45193665-4/2U	COV Vitkov	49.7662	17.7637	6000	3547	NO	22.1687	0	0	0	128.579	771.472	CZ08	A
CZ	CZ042		CZ4206-629260-49099469-4/1U	COV Litvinov	50.5517	13.5988	36000	31481	YES	196.756	629.62	472.215	944.43	1141.19	6847.12	CZ04	A
CZ	CZ042		CZ4207-687391-49099469-4/1U	COV Louny	50.3666	13.816	40000	24633	YES	153.956	492.66	369.495	738.99	892.946	5357.68	CZ04	A
CZ	CZ042		CZ4207-726117-49099469-4/1U	COV Postoloprty	50.3592	13.7075	5000	2689	NO	16.8063	0	0	0	97.4763	584.858	CZ04	B
CZ	CZ042		CZ4209-699594-49099469-4/1U	COV Most - Chanov	50.5067	13.6738	95000	74089	YES	463.056	1481.78	1111.34	2222.67	2685.73	16114.4	CZ04	A
CZ	CZ042		CZ4210-675466-49099469-4/1U	COV Kryry	50.1778	13.4338	7204	1412	NO	8.825	0	0	0	51.185	307.11	CZ04	A
CZ	CZ042		CZ4210-723231-49099469-4/1U	COV Podborany	50.2311	13.4144	7700	7187	NO	44.9187	0	0	0	260.529	1563.17	CZ04	A
CZ	CZ042		CZ4211-777510-49099469-4/1U	COV Roudnice nad Labem	50.4313	14.2567	15120	10454	NO	65.3375	0	0	0	378.957	2273.74	CZ04	A
CZ	CZ042		CZ4212-762890-49099469-4/1U	COV Sluknov	50.9926	14.5105	7000	2307	NO	14.4188	0	0	0	83.6288	501.773	CZ04	C
CZ	CZ042		CZ4213-616702-49099469-4/1U	COV Bystrany	50.6236	13.8691	104185	73553	YES	459.706	1471.06	1103.3	2206.59	2666.3	15997.8	CZ04	A
CZ	CZ042		CZ4213-789402-49099469-4/1U	COV Zelenky	50.5914	13.7875	17700	17942	NO	112.138	0	0	0	650.398	3902.39	CZ04	C
CZ	CZ042		CZ4214-703869-49099469-4/1U	COV Usti nad Labem - Nestemice	50.6688	14.1077	169000	92709	YES	579.431	1854.18	1390.63	2781.27	3360.7	20164.2	CZ04	A
CZ	CZ042		CZ4214-778681-00267139-4/1U	COV Velke Brezno	50.6652	14.1336	16050	15196	NO	94.975	0	0	0	550.855	3305.13	CZ04	A
CZ	CZ042		CZ4215-776971-49099469-4/1U	COV Varnsdorf	50.9056	14.6507	55450	20552	YES	128.45	411.04	308.28	616.56	745.01	4470.06	CZ04	A
CZ	CZ042		CZ4216-794732-49099469-4/2U	COV Zatec	50.331	13.5545	33333	23579	YES	147.369	471.58	353.685	707.37	854.739	5128.43	CZ04	A
CZ	CZ051		CZ5101-621382-49099469-4/1U	COV Ceska Lipa	50.6787	14.5122	48150	26352	YES	164.7	527.04	395.28	790.56	955.26	5731.56	CZ05	A
CZ	CZ051		CZ5101-628212-49099469-4/1U	COV Stare Splavy	50.592	14.6271	8433	4473	NO	27.9563	0	0	0	162.146	972.877	CZ05	A
CZ	CZ051		CZ5101-756466-49099469-4/1U	COV Straz pod Ralskem	50.6964	14.7909	7000	3366	NO	21.0375	0	0	0	122.018	732.105	CZ05	A
CZ	CZ051		CZ5101-918423-49099469-4/3U	COV Mimon Hradcany - SIGMA	50.6299	14.7398	9000	5721	NO	35.7563	0	0	0	207.386	1244.32	CZ05	A
CZ	CZ051		CZ5102-635090-00262781-4/1U	COV Frydlant	50.9212	15.0619	11000	4310	NO	26.9375	0	0	0	156.237	937.425	CZ05	B
CZ	CZ051		CZ5102-706523-25496565-4/1U	COV Nove Mesto pod Smrkem	50.9306	15.2219	6400	1640	NO	10.25	0	0	0	59.45	356.7	CZ05	B
CZ	CZ010		CZ1100-601527-00064581-4/2U	COV Ujezd nad Lesy	50.0768	14.6549	14000	5602	NO	35.0125	0	0	0	203.072	1218.43	CZ01	A
CZ	CZ010		CZ1100-633330-00064581-4/1U	COV Uhrineves -Dubec	50.0341	14.5938	14150	8133	NO	50.8313	0	0	0	294.821	1768.93	CZ01	A
CZ	CZ010		CZ1100-643777-00064581-4/1U	COV Horni Pocernice-Certouzy	50.0886	14.4252	10183	8446	NO	52.7875	0	0	0	306.168	1837.01	CZ01	A
CZ	CZ010		CZ1100-665444-00064581-4/1U	COV Klanovice	50.0962	14.671	6055	2730	NO	17.0625	0	0	0	98.9625	593.775	CZ01	A
CZ	CZ010		CZ1100-668591-00064581-4/1U	COV Kolovraty	50.0137	14.6252	5400	2536	NO	15.85	0	0	0	91.93	551.58	CZ01	A
CZ	CZ010		CZ1100-730106-00064581-4/1U	UCOV Praha	50.0827	14.4691	1641600	1198805	YES	7492.53	23976.1	17982.1	35964.2	43456.7	260740	CZ01	B
CZ	CZ010		CZ1100-731552-00064581-4/1U	COV Miskovice	50.1565	14.5415	15000	12866	NO	80.4125	0	0	0	466.393	2798.36	CZ01	A
CZ	CZ010		CZ1100-731641-00064581-4/1U	COV Kbely	50.134	14.5469	7117	5413	NO	33.8313	0	0	0	196.221	1177.33	CZ01	A
CZ	CZ071		CZ7109-667897-47674521-4/1U	COV Kojetin	49.3487	17.3205	5833	11530	NO	72.0625	0	0	0	417.962	2507.77	CZ07	C
CZ	CZ071		CZ7110-699080-00296244-4/1U	COV Moravsky Beroun	49.787	17.4425	5890	4761	NO	29.7562	0	0	0	172.586	1035.52	CZ07	B
CZ	CZ071		CZ7110-763578-47150891-4/1U	COV Sternberk	49.7179	17.2744	25600	16825	NO	105.156	0	0	0	609.906	3659.44	CZ07	A
CZ	CZ071		CZ7111-637203-64610276-4/1U	COV Hanusovice - pivovar a mesto	50.0616	16.9257	31200	21434	YES	133.963	428.68	321.51	643.02	776.983	4661.89	CZ07	A
CZ	CZ071		CZ7111-682837-00302899-4/1U	COV Libina	49.8567	17.1073	18270	10396	NO	64.975	0	0	0	376.855	2261.13	CZ07	A
CZ	CZ071		CZ7111-764264-47674954-4/1U	COV Sumperk	49.9423	16.9594	50000	27259	YES	170.369	545.18	408.885	817.77	988.139	5928.83	CZ07	C
CZ	CZ071		CZ7111-779083-00303551-4/1U	COV Velke Losiny	50.0125	17.036	6377	2714	NO	16.9625	0	0	0	98.3825	590.295	CZ07	A
CZ	CZ071		CZ7112-774502-47675772-4/1U	COV Unicov	49.7572	17.1249	20000	8284	NO	51.775	0	0	0	300.295	1801.77	CZ07	C
CZ	CZ071		CZ7113-726176-00303232-4/1U	COV Postrelmov	49.8966	16.9284	6300	4168	NO	26.05	0	0	0	151.09	906.54	CZ07	C
CZ	CZ071		CZ7113-789429-47674954-4/1U	COV Zabreh	49.8712	16.9021	57000	27486	YES	171.787	549.72	412.29	824.58	996.367	5978.2	CZ07	A
CZ	CZ072		CZ7201-617121-49451871-4/1U	COV Bystrice pod Hostynem	49.4006	17.6719	16817	7379	NO	46.1188	0	0	0	267.489	1604.93	CZ07	A
CZ	CZ072		CZ7202-641057-49451871-4/1U	COV Holesov	49.3273	17.5406	61867	17827	YES	111.419	356.54	267.405	534.81	646.229	3877.37	CZ07	A
CZ	CZ072		CZ7203-649309-49451871-4/1U	COV Hulin	49.3043	17.478	7000	3769	NO	23.5563	0	0	0	136.626	819.757	CZ07	A
CZ	CZ072		CZ7203-654230-49451871-4/1U	COV Chropyne	49.3488	17.3744	6500	3898	NO	24.3625	0	0	0	141.303	847.815	CZ07	C
CZ	CZ072		CZ7203-674834-49451871-4/1U	COV Kromeriz	49.2905	17.4242	66250	37425	YES	233.906	748.5	561.375	1122.75	1356.66	8139.94	CZ07	A
CZ	CZ072		CZ7204-688576-49454561-4/1U	COV Luhacovice	49.0863	17.732	16170	9744	NO	60.9	0	0	0	353.22	2119.32	CZ07	A
CZ	CZ072		CZ7204-750077-49454561-4/1U	COV Slavicin	49.0799	17.8891	8045	7416	NO	46.35	0	0	0	268.83	1612.98	CZ07	A
CZ	CZ072		CZ7205-701572-00284220-4/1U	COV Napajedla	49.1608	17.5084	14400	3717	NO	23.2313	0	0	0	134.741	808.447	CZ07	B
CZ	CZ072		CZ7205-716731-25342665-4/1U	COV Otrokovice	49.2054	17.5144	168300	91489	YES	571.806	1829.78	1372.34	2744.67	3316.48	19898.9	CZ07	A
CZ	CZ072		CZ7206-733750-70238880-4/1U	COV Horni a Prostredni Becva	49.443	18.2264	5000	1800	NO	11.25	0	0	0	65.25	391.5	CZ07	C
CZ	CZ072		CZ7206-793787-70238880-4/1U	COV Zubri	49.4603	18.0791	47000	25835	NO	161.469	0	0	0	936.519	5619.11	CZ07	A
CZ	CZ010		CZ1100-782378-00064581-4/1U	COV Vinor	50.146	14.581	8923	3877	NO	24.2313	0	0	0	140.541	843.247	CZ01	A
CZ	CZ010		CZ1100-791733-00064581-4/1U	COV Zbraslav	49.9691	14.3866	13000	7026	NO	43.9125	0	0	0	254.692	1528.15	CZ01	A
CZ	CZ020		CZ2101-602191-00231401-4/1U	COV Benesov	49.7867	14.6984	35330	30075	YES	187.969	601.5	451.125	902.25	1090.22	6541.31	CZ02	A
CZ	CZ020		CZ2101-746169-46356967-4/1U	COV Sazava	49.875	14.8825	5060	2410	NO	15.0625	0	0	0	87.3625	524.175	CZ02	B
CZ	CZ051		CZ5104-740900-00276057-4/1U	COV Rokytnice nad Jizerou	50.7189	15.4221	6000	4468	NO	27.925	0	0	0	161.965	971.79	CZ05	A
CZ	CZ051		CZ5104-781789-27061973-4/1U	COV Jilemnice - Devro	50.6262	15.4962	28852	28953	NO	180.956	0	0	0	1049.55	6297.28	CZ05	A
CZ	CZ020		CZ2109-774499-00235075-4/1U	COV Unhost	50.0816	14.1172	5000	4884	NO	30.525	0	0	0	177.045	1062.27	CZ02	B
CZ	CZ020		CZ2110-668150-00235440-4/1U	COV Kolin	50.0442	15.1864	34000	59130	YES	369.562	1182.6	886.95	1773.9	2143.46	12860.8	CZ02	C
CZ	CZ020		CZ2110-718823-00239607-4/1U	COV Pecky	50.0965	15.0406	7000	4280	NO	26.75	0	0	0	155.15	930.9	CZ02	A
CZ	CZ020		CZ2111-779873-46356991-4/1U	COV Kralupy nad Vltavou	50.2638	14.3103	59667	73194	YES	457.463	1463.88	1097.91	2195.82	2653.28	15919.7	CZ02	A
CZ	CZ020		CZ2112-677710-46356967-4/1U	COV Kutna Hora	49.9542	15.2901	36000	19597	YES	122.481	391.94	293.955	587.91	710.391	4262.35	CZ02	A
CZ	CZ020		CZ2112-793655-46356967-4/1U	COV Zruc I	49.7477	15.089	5600	2288	NO	14.3	0	0	0	82.94	497.64	CZ02	A
CZ	CZ020		CZ2113-602060-46357009-4/1U	COV Milovice -Benatska Vrutice	50.2277	14.8526	8100	6502	NO	40.6375	0	0	0	235.697	1414.18	CZ02	B
CZ	CZ020		CZ2113-689556-00239402-4/1U	COV Lysa nad Labem - Litol	50.184	14.8441	13950	6035	NO	37.7188	0	0	0	218.769	1312.61	CZ02	B
CZ	CZ020		CZ2114-692816-46356991-4/1U	COV Melnik	50.3277	14.4918	23900	16700	NO	104.375	0	0	0	605.375	3632.25	CZ02	C
CZ	CZ020		CZ2115-601705-46356983-4/1U	COV Bela pod Bezdezem	50.491	14.8402	5700	2851	NO	17.8188	0	0	0	103.349	620.092	CZ02	A
CZ	CZ063		CZ6107-701564-60418885-4/1U	COV Namest nad Oslavou	49.1971	16.1556	8000	4823	NO	30.1438	0	0	0	174.834	1049	CZ06	B
CZ	CZ063		CZ6108-706418-43383513-4/1U	COV Nove Mesto na Morave	49.5475	16.0726	18700	7673	NO	47.9563	0	0	0	278.146	1668.88	CZ06	B
CZ	CZ063		CZ6109-717215-00248789-4/1U	COV Pacov	49.4632	15.0234	7000	4221	NO	26.3812	0	0	0	153.011	918.067	CZ06	B
CZ	CZ063		CZ6110-662577-00248380-4/1U	COV Kamenice nad Lipou	49.2862	15.0778	7500	3746	NO	23.4125	0	0	0	135.792	814.755	CZ06	B
CZ	CZ063		CZ6110-718912-00248801-4/1U	COV Pelhrimov	49.4418	15.2251	38167	24680	YES	154.25	493.6	370.2	740.4	894.65	5367.9	CZ06	B
CZ	CZ063		CZ6110-723002-26048477-4/1U	COV Pocatky	49.2554	15.2338	5000	1995	NO	12.4688	0	0	0	72.3187	433.912	CZ06	A
CZ	CZ063		CZ6110-797154-00249505-4/1U	COV Zirovnice	49.2468	15.1769	8340	8298	NO	51.8625	0	0	0	300.803	1804.82	CZ06	B
CZ	CZ063		CZ6113-736562-60418885-4/1U	COV Trebic	49.2148	15.9151	69833	52373	YES	327.331	1047.46	785.595	1571.19	1898.52	11391.1	CZ06	C
CZ	CZ063		CZ6114-778214-43383513-4/1U	COV Velka Bites	49.2933	16.2333	9500	6052	NO	37.825	0	0	0	219.385	1316.31	CZ06	A
CZ	CZ063		CZ6114-779091-43383513-4/1U	COV Velke Mezirici	49.3418	16.0287	22300	12289	NO	76.8063	0	0	0	445.476	2672.86	CZ06	A
CZ	CZ063		CZ6115-637106-43383513-4/1U	COV Zdar nad Sazavou	49.5627	15.9193	34500	25347	YES	158.419	506.94	380.205	760.41	918.829	5512.97	CZ06	A
CZ	CZ064		CZ6201-600041-00279889-4/1U	COV Adamov	49.2867	16.6673	7100	2441	NO	15.2563	0	0	0	88.4862	530.918	CZ06	B
CZ	CZ064		CZ6201-605018-49468952-4/1U	COV Blansko	49.347	16.646	29376	13776	YES	86.1	275.52	206.64	413.28	499.38	2996.28	CZ06	B
CZ	CZ064		CZ6202-608327-49468952-4/1U	COV A Boskovice	49.4815	16.642	13060	10201	NO	63.7563	0	0	0	369.786	2218.72	CZ06	A
CZ	CZ064		CZ6202-680711-00280518-4/1U	COV Letovice	49.5322	16.5814	6380	1708	NO	10.675	0	0	0	61.915	371.49	CZ06	C
CZ	CZ064		CZ6202-710415-00280755-4/1U	COV Olesnice	49.55	16.422	5630	5274	NO	32.9625	0	0	0	191.182	1147.09	CZ06	A
CZ	CZ064		CZ6202-779237-00281247-4/1U	COV Velke Opatovice	49.6125	16.6915	5266	2562	NO	16.0125	0	0	0	92.8725	557.235	CZ06	A
CZ	CZ064		CZ6203-697931-46347275-4/1U	COV Brno - Modrice	49.1284	16.6308	513000	499542	YES	3122.14	9990.84	7493.13	14986.3	18108.4	108650	CZ06	A
CZ	CZ064		CZ6204-613584-49455168-4/1U	COV Breclav	48.7466	16.8937	50543	27725	YES	173.281	554.5	415.875	831.75	1005.03	6030.19	CZ06	A
CZ	CZ064		CZ6204-679828-49455168-4/1U	COV Lednice	48.7916	16.8223	12000	4256	NO	26.6	0	0	0	154.28	925.68	CZ06	C
CZ	CZ064		CZ6206-640417-49454544-4/1U	COV Hodonin	48.8414	17.1152	90000	46780	YES	292.375	935.6	701.7	1403.4	1695.77	10174.6	CZ06	A
CZ	CZ064		CZ6206-734021-00285226-4/1U	COV Prusanky	48.8338	16.9845	8605	3062	NO	19.1375	0	0	0	110.997	665.985	CZ06	A
CZ	CZ064		CZ6207-649864-49455168-4/1U	COV Hustopece	48.9313	16.7495	9900	8361	NO	52.2563	0	0	0	303.086	1818.52	CZ06	A
CZ	CZ064		CZ6207-779245-49455168-4/1U	COV Velke Pavlovice	48.8938	16.8225	5400	8537	NO	53.3562	0	0	0	309.466	1856.8	CZ06	A
CZ	CZ064		CZ6208-655741-49458892-4/1U	COV Ivancice	49.0984	16.3927	13967	18035	NO	112.719	0	0	0	653.769	3922.61	CZ06	A
CZ	CZ064		CZ6209-781304-00282804-4/1U	COV Veverska Bityska	49.2792	16.4514	6000	2957	NO	18.4812	0	0	0	107.191	643.147	CZ06	B
CZ	CZ064		CZ6210-617270-49454544-4/1U	COV Bzenec	48.9725	17.2993	22607	9964	NO	62.275	0	0	0	361.195	2167.17	CZ06	A
CZ	CZ064		CZ6210-678431-00285030-4/1U	COV Kyjov	48.9626	17.0895	26335	11585	YES	72.4062	231.7	173.775	347.55	419.956	2519.74	CZ06	B
CZ	CZ064		CZ6210-695157-75833352-4/1U	COV Milotice	48.9562	17.1268	7000	4566	NO	28.5375	0	0	0	165.517	993.105	CZ06	B
CZ	CZ064		CZ6210-760081-70863890-4/1U	COV Svatoborice-Mistrin	48.9625	17.0896	8500	7189	NO	44.9312	0	0	0	260.601	1563.61	CZ06	B
CZ	CZ064		CZ6211-694193-49455168-4/1U	COV Mikulov	48.7965	16.6275	25000	10788	YES	67.425	215.76	161.82	323.64	391.065	2346.39	CZ06	A
CZ	CZ064		CZ6212-695378-00293164-4/1U	COV Miroslav	48.9355	16.342	21250	3562	NO	22.2625	0	0	0	129.122	774.735	CZ06	C
CZ	CZ064		CZ6212-699128-60418885-4/2U	COV Moravsky Krumlov - Zamecka	49.0529	16.3074	5370	4016	NO	25.1	0	0	0	145.58	873.48	CZ06	B
CZ	CZ064		CZ6213-724866-49455168-4/1U	COV Pohorelice	48.9816	16.5324	6000	4901	NO	30.6312	0	0	0	177.661	1065.97	CZ06	A
CZ	CZ064		CZ6214-766861-49458892-4/1U	COV Tetcice	49.1701	16.4188	15000	12935	NO	80.8438	0	0	0	468.894	2813.36	CZ06	A
CZ	CZ064		CZ6215-750301-49454587-4/1U	COV Slavkov u Brna	49.1459	16.8629	9451	7696	NO	48.1	0	0	0	278.98	1673.88	CZ06	A
CZ	CZ064		CZ6216-604551-70835004-4/1U	COV Bilovice nad Svitavou	49.2418	16.6743	7750	4687	NO	29.2938	0	0	0	169.904	1019.42	CZ06	A
CZ	CZ064		CZ6216-698504-00282120-4/1U	COV Moravany u Brna	49.1429	16.5931	5500	7737	NO	48.3562	0	0	0	280.466	1682.8	CZ06	A
CZ	CZ064		CZ6217-614114-49457004-4/1U	COV Brezina u Tisnova	49.3211	16.4272	18000	13384	NO	83.65	0	0	0	485.17	2911.02	CZ06	B
CZ	CZ064		CZ6218-756652-49454544-4/1U	COV Straznice	48.8974	17.2946	9751	7852	NO	49.075	0	0	0	284.635	1707.81	CZ06	B
CZ	CZ064		CZ6218-778583-00285447-4/1U	COV Velka nad Velickou	48.8971	17.511	5500	1881	NO	11.7563	0	0	0	68.1863	409.118	CZ06	A
CZ	CZ064		CZ6218-780723-49454544-4/1U	COV Veseli nad Moravou	48.9494	17.3681	16000	7184	NO	44.9	0	0	0	260.42	1562.52	CZ06	B
CZ	CZ064		CZ6219-741922-49454587-4/1U	COV Rousinov	49.1963	16.8802	5500	6805	NO	42.5312	0	0	0	246.681	1480.09	CZ06	A
CZ	CZ064		CZ6219-788571-49454587-4/1U	COV Vyskov	49.28	17.0187	38330	23736	YES	148.35	474.72	356.04	712.08	860.43	5162.58	CZ06	B
CZ	CZ064		CZ6220-628123-45671745-4/1U	COV Znojmo	48.8474	16.0926	99000	84612	YES	528.825	1692.24	1269.18	2538.36	3067.18	18403.1	CZ06	A
CZ	CZ064		CZ6221-738921-00282456-4/1U	COV Rajhrad	49.0831	16.6093	5000	4633	NO	28.9563	0	0	0	167.946	1007.68	CZ06	B
CZ	CZ064		CZ6221-796701-49458841-4/1U	COV Zidlochovice	49.0247	16.6234	6000	5134	NO	32.0875	0	0	0	186.107	1116.64	CZ06	A
CZ	CZ071		CZ7101-631949-47674521-4/1U	COV Hranice	49.544	17.7183	30000	15767	NOT KNOWN	98.5438	0	0	0	571.554	3429.32	CZ07	B
CZ	CZ071		CZ7102-621901-65138066-4/1U	COV Ceska Ves	50.264	17.2429	41667	21598	YES	134.988	431.96	323.97	647.94	782.928	4697.56	CZ07	A
CZ	CZ071		CZ7104-684261-47674521-4/1U	COV Lipnik nad Becvou	49.5199	17.5882	13733	10201	NO	63.7563	0	0	0	369.786	2218.72	CZ07	A
CZ	CZ071		CZ7105-685909-00299138-4/1U	COV Litovel	49.7045	17.0946	40083	40639	YES	253.994	812.78	609.585	1219.17	1473.16	8838.98	CZ07	B
CZ	CZ071		CZ7106-698032-47674954-4/1U	COV Mohelnice	49.7816	16.9379	21212	7689	NO	48.0563	0	0	0	278.726	1672.36	CZ07	A
CZ	CZ071		CZ7107-640158-00299189-4/1U	COV Lutin	49.5583	17.1527	6200	4012	NO	25.075	0	0	0	145.435	872.61	CZ07	B
CZ	CZ071		CZ7107-710814-00299308-4/1U	COV Olomouc	49.5675	17.2649	259500	172991	YES	1081.19	3459.82	2594.86	5189.73	6270.92	37625.5	CZ07	A
CZ	CZ071		CZ7108-672441-49451723-4/1U	COV Prostejov	49.4643	17.1538	108000	58356	YES	364.725	1167.12	875.34	1750.68	2115.4	12692.4	CZ07	A
CZ	CZ071		CZ7109-626708-47674521-4/1U	COV Prerov	49.4502	17.3918	145000	90269	YES	564.181	1805.38	1354.04	2708.07	3272.25	19633.5	CZ07	C
CZ	CZ072		CZ7207-677345-49453866-4/1U	COV Uherske Hradiste	49.0667	17.4395	99830	70891	YES	443.069	1417.82	1063.37	2126.73	2569.8	15418.8	CZ07	B
CZ	CZ072		CZ7207-773131-00291480-4/1U	COV Uhersky Ostroh	48.9805	17.3819	7633	2947	NO	18.4187	0	0	0	106.829	640.972	CZ07	B
CZ	CZ072		CZ7208-606979-49453866-4/1U	COV Bojkovice	49.0422	17.8212	5800	3709	NO	23.1813	0	0	0	134.451	806.708	CZ07	A
CZ	CZ072		CZ7208-772984-00291463-4/1U	COV Uhersky Brod	49.0218	17.6306	74750	98665	YES	616.656	1973.3	1479.97	2959.95	3576.61	21459.6	CZ07	A
CZ	CZ072		CZ7209-613070-49454561-4/1U	COV Brumov - Bylnice	49.0684	18.0043	16570	4119	NO	25.7438	0	0	0	149.314	895.882	CZ07	A
CZ	CZ072		CZ7209-776319-49454561-4/1U	COV Valasske Klobouky	49.119	18.0192	8000	1735	NO	10.8438	0	0	0	62.8937	377.362	CZ07	C
CZ	CZ072		CZ7210-776432-70238880-4/1U	COV Valasske Mezirici	49.4871	17.9531	40000	58293	YES	364.331	1165.86	874.395	1748.79	2113.12	12678.7	CZ07	A
CZ	CZ072		CZ7210-791164-47674652-4/1U	COV Zasova	49.4642	18.032	8434	3505	NO	21.9062	0	0	0	127.056	762.337	CZ07	A
CZ	CZ072		CZ7211-750794-00284475-4/1U	COV Slusovice	49.2383	17.7941	7600	3642	NO	22.7625	0	0	0	132.022	792.135	CZ07	B
CZ	CZ072		CZ7211-783196-49454561-4/1U	COV Vizovice	49.2133	17.8264	8000	1479	NO	9.24375	0	0	0	53.6137	321.682	CZ07	A
CZ	CZ072		CZ7212-786764-47674652-4/1U	COV Vsetin	49.3496	17.9696	41670	31154	YES	194.713	623.08	467.31	934.62	1129.33	6776	CZ07	A
CZ	CZ072		CZ7213-635987-49454561-4/1U	COV Zlin	49.2103	17.5806	207000	88954	YES	555.962	1779.08	1334.31	2668.62	3224.58	19347.5	CZ07	A
CZ	CZ080		CZ8101-758396-45192588-4/1U	COV Studenka	49.7056	18.0653	14000	4254	NO	26.5875	0	0	0	154.208	925.245	CZ08	A
CZ	CZ080		CZ8101-778664-45193665-4/1U	COV Bilovec-Velke Albrechtice	49.7435	18.0766	5003	5545	NO	34.6562	0	0	0	201.006	1206.04	CZ08	C
CZ	CZ080		CZ8102-707031-45193665-4/1U	COV Bohumin	49.8961	18.3621	33680	12831	NO	80.1938	0	0	0	465.124	2790.74	CZ08	A
CZ	CZ080		CZ8103-613169-00295892-4/1U	COV Bruntal	49.9743	17.475	37383	19164	YES	119.775	383.28	287.46	574.92	694.695	4168.17	CZ08	A
CZ	CZ080		CZ8115-707546-45193665-4/1U	COV Novy Jicin	49.6137	18.0012	35000	26363	YES	164.769	527.26	395.445	790.89	955.659	5733.95	CZ08	A
CZ	CZ080		CZ8116-709085-45193665-4/1U	COV Odry	49.6574	17.8414	6250	4324	NO	27.025	0	0	0	156.745	940.47	CZ08	A
CZ	CZ080		CZ8117-711578-45193665-4/1U	COV Opava - Predmesti	49.9311	17.928	149000	79268	YES	495.425	1585.36	1189.02	2378.04	2873.47	17240.8	CZ08	A
CZ	CZ080		CZ8118-712493-45193665-4/1U	COV Orlova	49.8665	18.4883	33330	22333	NO	139.581	0	0	0	809.571	4857.43	CZ08	C
CZ	CZ080		CZ8118-712493-45193665-4/2U	COV Petrvald	49.8563	18.4178	5275	3939	NO	24.6188	0	0	0	142.789	856.733	CZ08	A
CZ	CZ080		CZ8119-713767-00845451-4/1U	UCOV Ostrava - Privoz	49.8555	18.2453	638850	235147	YES	1469.67	4702.94	3527.2	7054.41	8524.08	51144.5	CZ08	A
CZ	CZ080		CZ8119-714071-27804721-4/1U	UCOV CEZ Ostrava - Vitkovice	49.8214	18.2838	10000	1616	NO	10.1	0	0	0	58.58	351.48	CZ08	A
CZ	CZ080		CZ8119-714747-45193673-4/1U	COV Ostrava - Michalkovice	49.8423	18.3523	5280	1987	NO	12.4188	0	0	0	72.0288	432.173	CZ08	A
CZ	CZ080		CZ8103-786080-25386344-4/1U	COV Vrbno pod Pradedem	50.1127	17.3994	8500	2491	NO	15.5688	0	0	0	90.2988	541.793	CZ08	A
CZ	CZ080		CZ8104-652971-45193665-4/1U	COV Cesky Tesin - 04.1	49.7684	18.6093	30000	29548	YES	184.675	590.96	443.22	886.44	1071.11	6426.69	CZ08	A
CZ	CZ080		CZ8105-634719-45193665-4/1U	COV Frenstat pod Radhostem	49.5563	18.2012	20000	13210	NO	82.5625	0	0	0	478.862	2873.17	CZ08	B
CZ	CZ080		CZ8106-760676-45193665-4/1U	COV Frydek - Mistek	49.7022	18.3225	164467	93622	YES	585.138	1872.44	1404.33	2808.66	3393.8	20362.8	CZ08	A
CZ	CZ080		CZ8107-635171-45193665-4/1U	COV Frydlant nad Ostravici	49.6041	18.3553	15000	5962	NO	37.2625	0	0	0	216.123	1296.73	CZ08	B
CZ	CZ080		CZ8109-639711-25914685-4/1U	COV Hlucin - Jasenky	49.8851	18.1945	14609	5461	NO	34.1313	0	0	0	197.961	1187.77	CZ08	B
CZ	CZ052		CZ5208-631426-25973495-4/1U	COV Vamberk	50.1072	16.277	7500	1685	NO	10.5312	0	0	0	61.0812	366.487	CZ05	B
CZ	CZ052		CZ5208-670197-00274968-4/1U	COV Kostelec nad Orlici	50.1224	16.1902	10000	4903	NO	30.6438	0	0	0	177.734	1066.4	CZ05	B
CZ	CZ052		CZ5208-772429-75055384-4/1U	COV Tyniste nad Orlici	50.1549	16.0648	10053	2840	NO	17.75	0	0	0	102.95	617.7	CZ05	A
CZ	CZ052		CZ5209-621684-00272591-4/1U	COV Ceska Skalice - mestska	50.3889	16.0219	10000	11507	NO	71.9188	0	0	0	417.129	2502.77	CZ05	B
CZ	CZ052		CZ5209-701343-48172928-4/1U	COV Nachod	50.3943	16.1573	45990	37784	YES	236.15	755.68	566.76	1133.52	1369.67	8218.02	CZ05	A
CZ	CZ052		CZ5209-710369-00272566-4/1U	COV Cerveny Kostelec	50.4705	16.0799	8000	2648	NO	16.55	0	0	0	95.99	575.94	CZ05	B
CZ	CZ052		CZ5209-725323-00272949-4/1U	COV Police nad Metuji	50.5257	16.2225	11950	4062	NO	25.3875	0	0	0	147.248	883.485	CZ05	C
CZ	CZ052		CZ5210-753823-00271888-4/1U	COV Nova a Stara Paka	50.5189	15.4884	14000	12594	NO	78.7125	0	0	0	456.533	2739.19	CZ05	A
CZ	CZ052		CZ5211-706434-48172928-4/1U	COV Nove Mesto nad Metuji	50.3454	16.1183	25000	8422	NO	52.6375	0	0	0	305.297	1831.78	CZ05	B
CZ	CZ052		CZ5212-707163-48172898-4/1U	COV Novy Bydzov	50.2382	15.4982	9083	8671	NO	54.1938	0	0	0	314.324	1885.94	CZ05	A
CZ	CZ080		CZ8110-656348-45193665-4/1U	COV Jablunkov	49.5922	18.7462	8000	8870	NO	55.4375	0	0	0	321.537	1929.22	CZ08	B
CZ	CZ052		CZ5213-761800-00275336-4/1U	COV Rychnov nad Kneznou	50.15	16.2619	24880	5943	NO	37.1438	0	0	0	215.434	1292.6	CZ05	C
CZ	CZ052		CZ5214-606553-60108711-4/1U	COV Trutnov - Bohuslavice	50.5533	15.9729	47500	29808	YES	186.3	596.16	447.12	894.24	1080.54	6483.24	CZ05	A
CZ	CZ052		CZ5214-774651-00278386-4/1U	COV Upice	50.4994	16.0266	7000	2460	NO	15.375	0	0	0	89.175	535.05	CZ05	A
CZ	CZ052		CZ5215-645770-00277908-4/1U	COV Hostinne - Dlouha Louka	50.5226	15.7397	8033	2268	NO	14.175	0	0	0	82.215	493.29	CZ05	B
CZ	CZ052		CZ5215-762962-00278343-4/2U	COV Spindleruv Mlyn	50.7238	15.5934	15000	6654	NO	41.5875	0	0	0	241.207	1447.24	CZ05	A
CZ	CZ052		CZ5215-786331-00278475-4/1U	COV Vrchlabi - Podhuri	50.5926	15.6134	18800	11873	NO	74.2062	0	0	0	430.396	2582.38	CZ05	A
CZ	CZ053		CZ5301-681377-60108118-4/1U	COV Ceska Trebova	49.9849	16.3887	20000	26689	NO	166.806	0	0	0	967.476	5804.86	CZ05	A
CZ	CZ053		CZ5302-639303-48171590-4/1U	COV Hlinsko v Cechach	49.7493	15.8902	61213	31912	YES	199.45	638.24	478.68	957.36	1156.81	6940.86	CZ05	A
CZ	CZ080		CZ8111-664197-45193665-4/1U	COV Karvina	49.8676	18.5226	88300	47131	YES	294.569	942.62	706.965	1413.93	1708.5	10251	CZ08	A
CZ	CZ080		CZ8112-669393-45193665-4/1U	COV Koprivnice	49.612	18.1454	29000	22209	NO	138.806	0	0	0	805.076	4830.46	CZ08	A
CZ	CZ080		CZ8112-735370-45193665-4/1U	COV Pribor	49.6479	18.1483	10860	6194	NO	38.7125	0	0	0	224.532	1347.19	CZ08	B
CZ	CZ080		CZ8113-674231-00300292-4/1U	COV Kravare	49.9222	18.0405	7500	6533	NO	40.8313	0	0	0	236.821	1420.93	CZ08	B
CZ	CZ080		CZ8114-674630-00296139-4/1U	COV Krnov	50.081	17.7351	70000	121983	YES	762.394	2439.66	1829.74	3659.49	4421.88	26531.3	CZ08	C
DE	DE733	DEAG_HE066320200301	DETP_HE066320200301	Wildeck / Obersuhl	50.9507	10.0449	5200	4300	NOT KNOWN	26.875	0	0	0	155.875	935.25	DEG0	A
DE	DE112	DEAG_BW1155100000019	DETP_BW1155100000019	WEISSACH	48.8479	8.94488	11500	11785	NO	73.6562	0	0	0	427.206	2563.24	DE11	B
DE	DE112	DEAG_BW1155100000023	DETP_BW1155100000023	ZV AICHTAL - SCHÖNAICH	48.6525	9.08706	25000	27167	YES	169.794	543.34	407.505	815.01	984.804	5908.82	DE11	C
DE	DE112	DEAG_BW1155100000026	DETP_BW1155100000026	WEIL IM SCHOENBUCH	48.6273	9.07236	10000	7374	NO	46.0875	0	0	0	267.308	1603.85	DE11	B
DE	DE112	DEAG_BW1155100000027	DETP_BW1155100000027	WEIL DER STADT	48.7611	8.87955	14500	7834	NO	48.9625	0	0	0	283.983	1703.89	DE11	A
DE	DE112	DEAG_BW1155100000029	DETP_BW1155100000029	SKA Waldenbuch	48.6348	9.16219	14500	12779	NO	79.8688	0	0	0	463.239	2779.43	DE11	C
DE	DE112	DEAG_BW1155100000031	DETP_BW1155100000031	STEINENBRONN	48.6639	9.10947	9600	9389	NO	58.6813	0	0	0	340.351	2042.11	DE11	A
DE	DE112	DEAG_BW1155100000033	DETP_BW1155100000033	AIDLINGEN	48.6947	8.89954	11500	10851	NO	67.8188	0	0	0	393.349	2360.09	DE11	C
DE	DE112	DEAG_BW1155100000034	DETP_BW1155100000034	ZV WÜRMURSPRUNG - HILDRIZHAUSEN	48.6326	8.97748	13500	10209	NO	63.8063	0	0	0	370.076	2220.46	DE11	B
DE	DE112	DEAG_BW1155100000066	DETP_BW1155100000066	ZV BÖBLINGEN-SINDELFINGEN II (DARMSHEIM)	48.6982	8.9286	13800	12952	NO	80.95	0	0	0	469.51	2817.06	DE11	B
DE	DE112	DEAG_BW1155100000067	DETP_BW1155100000067	ZV GÄRTRINGEN - NUFRINGEN	48.6418	8.92977	36000	28688	NO	179.3	0	0	0	1039.94	6239.64	DE11	C
DE	DE111	DEAG_BW1115100000001	DETP_BW1115100000001	Hauptklärwerk Mühlhausen	48.8459	9.24071	1200000	821146	YES	5132.16	16422.9	12317.2	24634.4	29766.5	178599	DE11	A
DE	DE111	DEAG_BW1115100000032	DETP_BW1115100000032	SKA BÜSNAU ( LFKW) / STUTTGART-BÜSNAU	48.751	9.08967	9660	9976	NO	62.35	0	0	0	361.63	2169.78	DE11	B
DE	DE111	DEAG_BW1115100000033	DETP_BW1115100000033	Klärwerk Möhringen / S - Möhringen	48.7165	9.16911	160000	70849	YES	442.806	1416.98	1062.73	2125.47	2568.28	15409.7	DE11	A
DE	DE112	DEAG_BW1155100000016	DETP_BW1155100000016	BOEBLINGEN-SINDELFINGEN I	48.6917	8.98267	250000	191692	YES	1198.08	3833.84	2875.38	5750.76	6948.84	41693	DE11	A
DE	DE112	DEAG_BW1155100000017	DETP_BW1155100000017	ZV MITTLERES WÜRMTAL / WEIL DER STADT	48.7971	8.8321	28000	14656	NO	91.6	0	0	0	531.28	3187.68	DE12	B
DE	DE112	DEAG_BW1155100000018	DETP_BW1155100000018	ZV GRAFENAU-SCHAFHAUSEN	48.7192	8.89868	10100	11075	NO	69.2188	0	0	0	401.469	2408.81	DE11	B
DE	DE113	DEAG_BW1165100000015	DETP_BW1165100000015	LENNINGEN - GUTENBERG	48.5346	9.49546	6500	3149	NO	19.6813	0	0	0	114.151	684.908	DE11	C
DE	DE113	DEAG_BW1165100000020	DETP_BW1165100000020	LENNINGEN - OBERLENNINGEN	48.5572	9.46285	8000	10878	NO	67.9875	0	0	0	394.327	2365.96	DE11	A
DE	DE113	DEAG_BW1165100000024	DETP_BW1165100000024	NECKARTAILFINGEN	48.6139	9.29523	7000	7740	NO	48.375	0	0	0	280.575	1683.45	DE11	B
DE	DE113	DEAG_BW1165100000025	DETP_BW1165100000025	NECKARTENZLINGEN	48.5963	9.24428	17500	15453	NO	96.5813	0	0	0	560.171	3361.03	DE11	A
DE	DE113	DEAG_BW1165100000028	DETP_BW1165100000028	NEUHAUSEN A.D.FILDERN	48.6803	9.30046	15000	12621	NO	78.8813	0	0	0	457.511	2745.07	DE11	C
DE	DE113	DEAG_BW1165100000030	DETP_BW1165100000030	NOTZINGEN	48.6707	9.44047	8300	6073	NO	37.9563	0	0	0	220.146	1320.88	DE11	C
DE	DE113	DEAG_BW1165100000032	DETP_BW1165100000032	NUERTINGEN	48.6397	9.33739	75000	48268	YES	301.675	965.36	724.02	1448.04	1749.71	10498.3	DE11	A
DE	DE113	DEAG_BW1165100000036	DETP_BW1165100000036	OSTFILDERN - NELLINGEN/ORT	48.7027	9.28844	45000	33348	YES	208.425	666.96	500.22	1000.44	1208.86	7253.19	DE11	C
DE	DE113	DEAG_BW1165100000038	DETP_BW1165100000038	OWEN	48.5981	9.44469	16000	6278	NO	39.2375	0	0	0	227.578	1365.47	DE11	B
DE	DE113	DEAG_BW1165100000039	DETP_BW1165100000039	REICHENBACH A.D. FILS	48.7042	9.44782	31000	10864	NO	67.9	0	0	0	393.82	2362.92	DE11	A
DE	DE113	DEAG_BW1165100000040	DETP_BW1165100000040	WEILHEIM A.D. TECK	48.627	9.51466	18000	12563	NO	78.5187	0	0	0	455.409	2732.45	DE11	A
DE	DE113	DEAG_BW1165100000043	DETP_BW1165100000043	WERNAU (NECKAR)	48.7026	9.42035	30000	8683	NO	54.2688	0	0	0	314.759	1888.55	DE11	A
DE	DE113	DEAG_BW1165100000044	DETP_BW1165100000044	WOLFSCHLUGEN	48.6448	9.28754	8300	5483	NO	34.2688	0	0	0	198.759	1192.55	DE11	B
DE	DE113	DEAG_BW1165100000045	DETP_BW1165100000045	ZV UNTERES AICHTAL - AICHTAL-GRÖTZINGEN	48.6319	9.28311	22000	12757	NO	79.7313	0	0	0	462.441	2774.65	DE11	C
DE	DE113	DEAG_BW1165100000046	DETP_BW1165100000046	ZV PLOCHINGEN-ALTBACH-ZELL	48.7253	9.34692	55000	30035	YES	187.719	600.7	450.525	901.05	1088.77	6532.61	DE11	A
DE	DE113	DEAG_BW1165100000047	DETP_BW1165100000047	ZV BEMPFLINGEN-RIEDERICH	48.5787	9.25837	13000	13138	NO	82.1125	0	0	0	476.252	2857.51	DE11	A
DE	DE113	DEAG_BW1165100000048	DETP_BW1165100000048	ZV NEUFFENER TAL - FRICKENHAUSEN	48.6004	9.34914	40000	13782	NO	86.1375	0	0	0	499.597	2997.58	DE11	A
DE	DE113	DEAG_BW1165100000049	DETP_BW1165100000049	ZV WENDLINGEN	48.6843	9.38127	170213	96964	YES	606.025	1939.28	1454.46	2908.92	3514.94	21089.7	DE11	A
DE	DE113	DEAG_BW1165100000094	DETP_BW1165100000094	STGT-PLIENINGEN	48.7107	9.23073	133000	65822	YES	411.388	1316.44	987.33	1974.66	2386.05	14316.3	DE11	B
DE	DE114	DEAG_BW1175100000052	DETP_BW1175100000052	Böhmenkirch - Treffelhausen	48.6722	9.89687	8300	8931	NO	55.8188	0	0	0	323.749	1942.49	DE11	C
DE	DE114	DEAG_BW1175100000053	DETP_BW1175100000053	Bad Boll	48.6521	9.62289	8200	5186	NO	32.4125	0	0	0	187.993	1127.95	DE11	C
DE	DE114	DEAG_BW1175100000058	DETP_BW1175100000058	Ebersbach a. d. Fils	48.7126	9.49905	23500	16378	NO	102.363	0	0	0	593.703	3562.22	DE11	C
DE	DE114	DEAG_BW1175100000059	DETP_BW1175100000059	Geislingen a. d. Steige	48.6329	9.81376	55000	53910	YES	336.938	1078.2	808.65	1617.3	1954.24	11725.4	DE11	A
DE	DE114	DEAG_BW1175100000062	DETP_BW1175100000062	Göppingen	48.704	9.60358	330000	257107	YES	1606.92	5142.14	3856.61	7713.21	9320.13	55920.8	DE11	A
DE	DE114	DEAG_BW1175100000070	DETP_BW1175100000070	Uhingen	48.7159	9.55873	50000	22549	YES	140.931	450.98	338.235	676.47	817.401	4904.41	DE11	A
DE	DE114	DEAG_BW1175100000073	DETP_BW1175100000073	Schlierbach	48.6744	9.50753	7000	5381	NO	33.6313	0	0	0	195.061	1170.37	DE11	B
DE	DE114	DEAG_BW1175100000074	DETP_BW1175100000074	ZV Marbach - Krettenbachtal	48.7449	9.64862	8000	4158	NO	25.9875	0	0	0	150.727	904.365	DE11	B
DE	DE114	DEAG_BW1175100000075	DETP_BW1175100000075	ZV AV Deggingen	48.6082	9.73869	20000	12734	NO	79.5875	0	0	0	461.608	2769.64	DE11	B
DE	DE114	DEAG_BW1175100000078	DETP_BW1175100000078	ZV Mittlere Fils Salach	48.6912	9.72567	85000	47307	YES	295.669	946.14	709.605	1419.21	1714.88	10289.3	DE11	A
DE	DE115	DEAG_BW1185100000004	DETP_BW1185100000004	SKA BESIGHEIM - BESIGHEIM	49.004	9.14572	24000	11484	NO	71.775	0	0	0	416.295	2497.77	DE11	A
DE	DE115	DEAG_BW1185100000005	DETP_BW1185100000005	SKA BIETIGHEIM - BIETIGHEIM-BISSINGEN	48.9771	9.14934	140000	109690	YES	685.562	2193.8	1645.35	3290.7	3976.26	23857.6	DE11	C
DE	DE115	DEAG_BW1185100000006	DETP_BW1185100000006	SKA BÖNNIGHEIM - BÖNNIGHEIM	49.0383	9.10691	22000	12642	NO	79.0125	0	0	0	458.272	2749.63	DE11	A
DE	DE115	DEAG_BW1185100000007	DETP_BW1185100000007	SKA DITZINGEN - DITZINGEN	48.8406	9.05635	120000	87437	YES	546.481	1748.74	1311.56	2623.11	3169.59	19017.5	DE11	B
DE	DE115	DEAG_BW1185100000008	DETP_BW1185100000008	SKA EGLOSHEIM - LUDWIGSBURG/EGLOSHEIM	48.9141	9.1637	18400	11781	NO	73.6313	0	0	0	427.061	2562.37	DE11	A
DE	DE115	DEAG_BW1185100000011	DETP_BW1185100000011	SKA ERLIGHEIM - ERLIGHEIM	49.0141	9.10733	6000	4879	NO	30.4938	0	0	0	176.864	1061.18	DE11	B
DE	DE115	DEAG_BW1185100000013	DETP_BW1185100000013	SKA FREIBERG - FREIBERG A.N.	48.9412	9.19548	25000	13265	NO	82.9062	0	0	0	480.856	2885.14	DE11	A
DE	DE115	DEAG_BW1185100000014	DETP_BW1185100000014	SKA GEMMRIGHEIM - GEMMRIGHEIM	49.0359	9.15343	5500	6994	NO	43.7125	0	0	0	253.532	1521.19	DE11	A
DE	DE115	DEAG_BW1185100000015	DETP_BW1185100000015	SKA HÄLDENMÜHLE - MARBACH A.N.	48.9505	9.25201	80000	76716	YES	479.475	1534.32	1150.74	2301.48	2780.95	16685.7	DE11	B
DE	DE115	DEAG_BW1185100000016	DETP_BW1185100000016	SKA HESSIGHEIM - HESSIGHEIM	48.9864	9.1818	6500	6267	NO	39.1688	0	0	0	227.179	1363.07	DE11	B
DE	DE115	DEAG_BW1185100000019	DETP_BW1185100000019	SKA KORNWESTHEIM - KORNWESTHEIM	48.8636	9.21303	41000	40727	YES	254.544	814.54	610.905	1221.81	1476.35	8858.12	DE11	A
DE	DE115	DEAG_BW1185100000020	DETP_BW1185100000020	SKA LEUDELSBACH - MARKGRÖNINGEN	48.9139	9.08455	35000	27484	YES	171.775	549.68	412.26	824.52	996.295	5977.77	DE11	B
DE	DE115	DEAG_BW1185100000021	DETP_BW1185100000021	SKA HOHENECK - LUDWIGSBURG/HOHENECK	48.9202	9.21119	167000	86373	YES	539.831	1727.46	1295.6	2591.19	3131.02	18786.1	DE11	B
DE	DE115	DEAG_BW1185100000022	DETP_BW1185100000022	SKA POPPENWEILER - LUDWIGSBURG/POPPENWEILER	48.9004	9.26027	31000	17682	NO	110.513	0	0	0	640.973	3845.84	DE11	A
DE	DE115	DEAG_BW1185100000023	DETP_BW1185100000023	SKA MUNDELSHEIM - Mundelsheim	49.0036	9.19981	8300	7932	NO	49.575	0	0	0	287.535	1725.21	DE11	A
DE	DE115	DEAG_BW1185100000026	DETP_BW1185100000026	SKA OBERES BOTTWARTAL - OBERSTENFELD	49.0134	9.31551	15000	9694	NO	60.5875	0	0	0	351.408	2108.45	DE11	B
DE	DE115	DEAG_BW1185100000035	DETP_BW1185100000035	SKA TALHAUSEN - MARKGRÖNINGEN	48.9181	9.06667	75000	35819	YES	223.869	716.38	537.285	1074.57	1298.44	7790.63	DE11	C
DE	DE115	DEAG_BW1185100000036	DETP_BW1185100000036	SKA VAIHINGEN - VAIHINGEN A.D.ENZ	48.9246	8.95403	20000	14221	NO	88.8813	0	0	0	515.511	3093.07	DE11	A
DE	DE115	DEAG_BW1185100000038	DETP_BW1185100000038	SKA WEIDACH - KIRCHHEIM A.N.	49.0471	9.14936	6500	8017	NO	50.1062	0	0	0	290.616	1743.7	DE11	A
DE	DE115	DEAG_BW1185100000173	DETP_BW1185100000173	SKA STRUDELBACH II - VAHINGEN A. D. ENZ/ENZWEIH.	48.9202	8.99522	38000	30052	YES	187.825	601.04	450.78	901.56	1089.38	6536.31	DE11	A
DE	DE116	DEAG_BW1195100000002	DETP_BW1195100000002	SKA SCHWAIKHEIM	48.8747	9.32745	15000	13508	NO	84.425	0	0	0	489.665	2937.99	DE11	B
DE	DE116	DEAG_BW1195100000003	DETP_BW1195100000003	SKA SULZBACH	48.9961	9.48465	15000	9039	NO	56.4938	0	0	0	327.664	1965.98	DE11	C
DE	DE116	DEAG_BW1195100000004	DETP_BW1195100000004	SKA WAIBLINGEN - HEGNACH	48.8683	9.30538	25000	19609	NO	122.556	0	0	0	710.826	4264.96	DE11	B
DE	DE116	DEAG_BW1195100000005	DETP_BW1195100000005	SKA FELLBACH - ERBACH	48.8142	9.30092	50000	34710	YES	216.938	694.2	520.65	1041.3	1258.24	7549.42	DE11	A
DE	DE116	DEAG_BW1195100000006	DETP_BW1195100000006	SKA OPPENWEILER	48.9797	9.45912	5800	4971	NO	31.0687	0	0	0	180.199	1081.19	DE11	A
DE	DE116	DEAG_BW1195100000007	DETP_BW1195100000007	SKA WINNENDEN - ZIPFELBACHTAL	48.8787	9.37761	28450	20592	YES	128.7	411.84	308.88	617.76	746.46	4478.76	DE11	B
DE	DE116	DEAG_BW1195100000008	DETP_BW1195100000008	SKA ZV EICHBACHTAL	48.9469	9.32301	12000	11062	NO	69.1375	0	0	0	400.998	2405.98	DE11	C
DE	DE116	DEAG_BW1195100000011	DETP_BW1195100000011	SKA PLÜDERHAUSEN - URBACH	48.8045	9.56879	40000	19821	YES	123.881	396.42	297.315	594.63	718.511	4311.07	DE11	A
DE	DE116	DEAG_BW1195100000013	DETP_BW1195100000013	SKA KERNEN - HALDENBACH	48.7975	9.35334	12000	5066	NO	31.6625	0	0	0	183.642	1101.85	DE11	B
DE	DE116	DEAG_BW1195100000014	DETP_BW1195100000014	SKA KERNEN - BEIBACH	48.8075	9.33867	6000	2888	NO	18.05	0	0	0	104.69	628.14	DE11	B
DE	DE116	DEAG_BW1195100000015	DETP_BW1195100000015	SKA KERNEN - KRÄTTENBACH	48.8158	9.32537	17000	6899	NO	43.1187	0	0	0	250.089	1500.53	DE11	A
DE	DE116	DEAG_BW1195100000018	DETP_BW1195100000018	SKA MURRHARDT	48.9865	9.55179	20000	22364	NO	139.775	0	0	0	810.695	4864.17	DE11	A
DE	DE116	DEAG_BW1195100000024	DETP_BW1195100000024	SKA BERGLEN	48.8508	9.4473	9100	10643	NO	66.5187	0	0	0	385.809	2314.85	DE11	B
DE	DE116	DEAG_BW1195100000027	DETP_BW1195100000027	SKA WEINSTADT	48.8152	9.3784	95000	43571	YES	272.319	871.42	653.565	1307.13	1579.45	9476.69	DE11	A
DE	DE116	DEAG_BW1195100000031	DETP_BW1195100000031	SKA ASPACH - KLÖPFERBACHTAL	48.9547	9.39506	13000	11917	NO	74.4813	0	0	0	431.991	2591.95	DE11	C
DE	DE116	DEAG_BW1195100000033	DETP_BW1195100000033	SKA ZV BUCHENBACHTAL	48.9059	9.36506	45000	33828	YES	211.425	676.56	507.42	1014.84	1226.26	7357.59	DE11	B
DE	DE116	DEAG_BW1195100000035	DETP_BW1195100000035	SKA ZV WEISSACHER TAL	48.938	9.46764	25000	18093	NO	113.081	0	0	0	655.871	3935.23	DE11	B
DE	DE116	DEAG_BW1195100000036	DETP_BW1195100000036	SKA WELZHEIM	48.8704	9.64425	15000	18817	NO	117.606	0	0	0	682.116	4092.7	DE11	A
DE	DE116	DEAG_BW1195100000038	DETP_BW1195100000038	SKA SCHORNDORF	48.803	9.50108	56000	41870	YES	261.688	837.4	628.05	1256.1	1517.79	9106.72	DE11	B
DE	DE116	DEAG_BW1195100000039	DETP_BW1195100000039	SKA WINTERBACH	48.8029	9.46983	19000	8879	NO	55.4938	0	0	0	321.864	1931.18	DE11	A
DE	DE116	DEAG_BW1195100000044	DETP_BW1195100000044	SKA RUDERSBERG - WIESLAUFTAL	48.8531	9.53614	21000	11687	NO	73.0438	0	0	0	423.654	2541.92	DE11	B
DE	DE116	DEAG_BW1195100000049	DETP_BW1195100000049	SKA BACKNANG - NEUSCHÖNTAL	48.9357	9.39955	67000	26512	YES	165.7	530.24	397.68	795.36	961.06	5766.36	DE11	C
DE	DE116	DEAG_BW1195100000050	DETP_BW1195100000050	SKA ALFDORF	48.8417	9.71658	6000	4293	NO	26.8313	0	0	0	155.621	933.728	DE11	A
DE	DE116	DEAG_BW1195100000054	DETP_BW1195100000054	SKA REMSHALDEN - GRUNBACH	48.813	9.40898	25000	12958	NO	80.9875	0	0	0	469.727	2818.36	DE11	A
DE	DE116	DEAG_BW1195100000056	DETP_BW1195100000056	SKA WAIBLINGEN	48.8415	9.31093	70000	50178	YES	313.613	1003.56	752.67	1505.34	1818.95	10913.7	DE11	A
DE	DE117	DEAG_BW1215100000017	DETP_BW1215100000017	SKA HEILBRONN	49.182	9.21658	500000	249725	YES	1560.78	4994.5	3745.88	7491.75	9052.53	54315.2	DE11	A
DE	DE118	DEAG_BW1255100000002	DETP_BW1255100000002	SKA BAD RAPPENAU	49.2589	9.1191	20000	34747	NO	217.169	0	0	0	1259.58	7557.47	DE11	C
DE	DE118	DEAG_BW1255100000003	DETP_BW1255100000003	SKA BAD RAPPENAU - BONFELD	49.2096	9.10368	8000	7221	NO	45.1313	0	0	0	261.761	1570.57	DE11	B
DE	DE118	DEAG_BW1255100000005	DETP_BW1255100000005	SKA BEILSTEIN	49.0346	9.31691	9000	6854	NO	42.8375	0	0	0	248.457	1490.74	DE11	A
DE	DE118	DEAG_BW1255100000009	DETP_BW1255100000009	SKA EPPINGEN	49.1414	8.92514	31350	26013	YES	162.581	520.26	390.195	780.39	942.971	5657.83	DE11	A
DE	DE118	DEAG_BW1255100000011	DETP_BW1255100000011	SKA GEMMINGEN	49.1576	8.9694	9000	4807	NO	30.0438	0	0	0	174.254	1045.52	DE11	B
DE	DE118	DEAG_BW1255100000013	DETP_BW1255100000013	SKA GUNDELSHEIM	49.2878	9.14756	33300	8197	YES	51.2312	163.94	122.955	245.91	297.141	1782.85	DE11	B
DE	DE118	DEAG_BW1255100000020	DETP_BW1255100000020	SKA LAUFFEN AM NECKAR	49.0789	9.16743	41000	21181	YES	132.381	423.62	317.715	635.43	767.811	4606.87	DE11	B
DE	DE118	DEAG_BW1255100000022	DETP_BW1255100000022	SKA MÖCKMÜHL	49.3062	9.35975	15000	9914	NO	61.9625	0	0	0	359.383	2156.3	DE11	C
DE	DE118	DEAG_BW1255100000026	DETP_BW1255100000026	SKA NEUDENAU - HERBOLZHEIM	49.272	9.25121	7000	5161	NO	32.2563	0	0	0	187.086	1122.52	DE11	C
DE	DE118	DEAG_BW1255100000029	DETP_BW1255100000029	SKA OEDHEIM	49.2422	9.24044	9500	3941	NO	24.6312	0	0	0	142.861	857.168	DE11	B
DE	DE118	DEAG_BW1255100000038	DETP_BW1255100000038	SKA ZV GKW SECKACHTAL	49.3557	9.34801	19000	11884	NO	74.275	0	0	0	430.795	2584.77	DE11	B
DE	DE118	DEAG_BW1255100000039	DETP_BW1255100000039	SKA ZV GKA BRETTACHTAL	49.2274	9.36404	27300	14786	NO	92.4125	0	0	0	535.992	3215.95	DE11	B
DE	DE118	DEAG_BW1255100000040	DETP_BW1255100000040	SKA ZV GKA SULMTAL ELLHOFEN	49.1538	9.31128	40000	37707	YES	235.669	754.14	565.605	1131.21	1366.88	8201.27	DE11	B
DE	DE118	DEAG_BW1255100000042	DETP_BW1255100000042	SKA AZV UNTERES KOCHERTAL	49.257	9.29152	32000	26551	YES	165.944	531.02	398.265	796.53	962.474	5774.84	DE11	B
DE	DE118	DEAG_BW1255100000043	DETP_BW1255100000043	SKA ZV KW NECKARWESTHEIM	49.0507	9.17692	9950	10203	NO	63.7688	0	0	0	369.859	2219.15	DE11	B
DE	DE118	DEAG_BW1255100000044	DETP_BW1255100000044	SKA ZV UNTERES SULMTAL NECKARSULM	49.2062	9.21824	200000	167048	YES	1044.05	3340.96	2505.72	5011.44	6055.49	36332.9	DE11	A
DE	DE118	DEAG_BW1255100000045	DETP_BW1255100000045	SKA ZV GKA OBERE ZABER Güglingen Frauenzimmern	49.0687	9.04706	20000	16579	NO	103.619	0	0	0	600.989	3605.93	DE11	B
DE	DE118	DEAG_BW1255100000046	DETP_BW1255100000046	SKA ZV GKA SCHOZACHTAL ILSFELD	49.0532	9.22599	35000	21756	YES	135.975	435.12	326.34	652.68	788.655	4731.93	DE11	C
DE	DE118	DEAG_BW1255100000824	DETP_BW1255100000824	VKA AZV JAGST - KESSACH WIDDERN	49.3198	9.40845	15925	15902	NO	99.3875	0	0	0	576.447	3458.68	DE11	B
DE	DE119	DEAG_BW1265100000005	DETP_BW1265100000005	SKA Forchtenberg	49.2912	9.55148	5000	5743	NO	35.8938	0	0	0	208.184	1249.1	DE11	B
DE	DE119	DEAG_BW1265100000010	DETP_BW1265100000010	SKA Ingelfingen-Criesbach	49.3014	9.63322	6220	3454	NO	21.5875	0	0	0	125.207	751.245	DE11	B
DE	DE119	DEAG_BW1265100000014	DETP_BW1265100000014	SKA Krautheim	49.3788	9.63029	11000	14368	NO	89.8	0	0	0	520.84	3125.04	DE11	A
DE	DE119	DEAG_BW1265100000017	DETP_BW1265100000017	SKA Künzelsau	49.2826	9.68107	19000	24065	NO	150.406	0	0	0	872.356	5234.14	DE11	A
DE	DE119	DEAG_BW1265100000021	DETP_BW1265100000021	SKA Kupferzell	49.2309	9.67878	6800	4641	NO	29.0062	0	0	0	168.236	1009.42	DE11	B
DE	DE119	DEAG_BW1265100000024	DETP_BW1265100000024	SKA Mulfingen	49.3498	9.78764	5900	5697	NO	35.6063	0	0	0	206.516	1239.1	DE11	C
DE	DE119	DEAG_BW1265100000026	DETP_BW1265100000026	SKA Neuenstein	49.1985	9.55449	8335	8318	NO	51.9875	0	0	0	301.528	1809.17	DE11	C
DE	DE119	DEAG_BW1265100000030	DETP_BW1265100000030	SKA Niedernhall	49.2904	9.6144	6000	5638	NO	35.2375	0	0	0	204.377	1226.26	DE11	A
DE	DE119	DEAG_BW1265100000031	DETP_BW1265100000031	SKA Öhringen	49.2083	9.48104	49500	34703	NO	216.894	0	0	0	1257.98	7547.9	DE11	A
DE	DE119	DEAG_BW1265100000035	DETP_BW1265100000035	SKA Schöntal	49.3348	9.51366	6000	4485	NO	28.0312	0	0	0	162.581	975.487	DE11	C
DE	DE119	DEAG_BW1265100000038	DETP_BW1265100000038	SKA Waldenburg	49.2037	9.64695	9000	6183	NO	38.6438	0	0	0	224.134	1344.8	DE11	C
DE	DE119	DEAG_BW1265100000040	DETP_BW1265100000040	SKA Weißbach	49.293	9.59567	5500	2304	NO	14.4	0	0	0	83.52	501.12	DE11	B
DE	DE11A	DEAG_BW1275100000003	DETP_BW1275100000003	SKA Blaufelden-Blaufelden	49.2874	9.97146	5000	6565	NO	41.0312	0	0	0	237.981	1427.89	DE11	B
DE	DE11A	DEAG_BW1275100000014	DETP_BW1275100000014	SKA Crailsheim-Crailsheim	49.1532	10.0633	100000	114520	YES	715.75	2290.4	1717.8	3435.6	4151.35	24908.1	DE11	C
DE	DE11A	DEAG_BW1275100000021	DETP_BW1275100000021	SKA Fichtenau-Unterdeufstetten	49.0462	10.2364	8000	6643	NO	41.5188	0	0	0	240.809	1444.85	DE11	B
DE	DE11A	DEAG_BW1275100000028	DETP_BW1275100000028	SKA Gaildorf	49.0087	9.7619	18000	11729	NO	73.3063	0	0	0	425.176	2551.06	DE11	A
DE	DE11A	DEAG_BW1275100000034	DETP_BW1275100000034	SKA Ilshofen-Ilshofen	49.1637	9.91627	8000	7565	NO	47.2812	0	0	0	274.231	1645.39	DE11	A
DE	DE11A	DEAG_BW1275100000040	DETP_BW1275100000040	SKA Kirchberg/Jagst-Kirchberg	49.2064	9.98085	6400	5576	NO	34.85	0	0	0	202.13	1212.78	DE11	A
DE	DE11A	DEAG_BW1275100000051	DETP_BW1275100000051	SKA Mainhardt-Mainhardt	49.0847	9.5515	7500	9411	NO	58.8188	0	0	0	341.149	2046.89	DE11	B
DE	DE11A	DEAG_BW1275100000061	DETP_BW1275100000061	SKA Rottal	48.9962	9.68701	10000	10198	NO	63.7375	0	0	0	369.678	2218.07	DE11	C
DE	DE138	DEAG_BW3355100000003	DETP_BW3355100000003	VKA Oberes Bibertal/Tengen	47.7666	8.68696	7500	5948	NO	37.175	0	0	0	215.615	1293.69	DE13	C
DE	DE138	DEAG_BW3355100000004	DETP_BW3355100000004	SKA Radolfzell	47.741	8.9818	67000	32962	YES	206.013	659.24	494.43	988.86	1194.87	7169.23	DE13	A
DE	DE11A	DEAG_BW1275100000062	DETP_BW1275100000062	SKA Obersontheim-Obersontheim	49.0637	9.89623	7000	4771	NO	29.8187	0	0	0	172.949	1037.69	DE11	B
DE	DE11A	DEAG_BW1275100000064	DETP_BW1275100000064	SKA Rosengarten-Rieden	49.0597	9.71128	9900	6718	NO	41.9875	0	0	0	243.528	1461.16	DE11	B
DE	DE11A	DEAG_BW1275100000068	DETP_BW1275100000068	SKA Rot am See-Brettenfeld	49.2567	10.0145	10000	5592	NO	34.95	0	0	0	202.71	1216.26	DE11	A
DE	DE11A	DEAG_BW1275100000073	DETP_BW1275100000073	SKA Satteldorf-Neidenfels	49.1785	10.0596	9800	7845	NO	49.0312	0	0	0	284.381	1706.29	DE11	B
DE	DE11A	DEAG_BW1275100000074	DETP_BW1275100000074	SKA Schrozberg-Schrozberg	49.3512	9.98661	19000	14917	NO	93.2313	0	0	0	540.741	3244.45	DE11	B
DE	DE11A	DEAG_BW1275100000079	DETP_BW1275100000079	SKA Schwäbisch Hall-Schwäbisch Hall	49.1266	9.7332	85000	95009	YES	593.806	1900.18	1425.13	2850.27	3444.08	20664.5	DE11	A
DE	DE11A	DEAG_BW1275100000080	DETP_BW1275100000080	SKA Schwäbisch Hall-Sulzdorf	49.1022	9.85073	5800	6079	NO	37.9937	0	0	0	220.364	1322.18	DE11	B
DE	DE11A	DEAG_BW1275100000083	DETP_BW1275100000083	SKA Stimpfach-Stimpfach	49.0639	10.0808	9950	5896	NO	36.85	0	0	0	213.73	1282.38	DE11	B
DE	DE11A	DEAG_BW1275100000089	DETP_BW1275100000089	SKA Vellberg-Vellberg	49.0911	9.87859	7000	6398	NO	39.9875	0	0	0	231.928	1391.57	DE11	B
DE	DE11B	DEAG_BW1285100000051	DETP_BW1285100000051	SKA BAD MERGENTHEIM	49.5005	9.74981	50000	43210	YES	270.062	864.2	648.15	1296.3	1566.36	9398.17	DE11	A
DE	DE11B	DEAG_BW1285100000057	DETP_BW1285100000057	SKA UNTERSCHÜPF	49.5158	9.69648	18300	14073	NO	87.9562	0	0	0	510.146	3060.88	DE11	B
DE	DE11B	DEAG_BW1285100000061	DETP_BW1285100000061	SKA CREGLINGEN	49.4798	10.0191	5500	7487	NO	46.7937	0	0	0	271.404	1628.42	DE11	C
DE	DE11B	DEAG_BW1285100000066	DETP_BW1285100000066	SKA MONDFELD-BOXTAL	49.7711	9.40076	6000	4068	NO	25.425	0	0	0	147.465	884.79	DE11	B
DE	DE11B	DEAG_BW1285100000071	DETP_BW1285100000071	SKA GRÜNSFELD	49.6014	9.73692	11000	8192	NO	51.2	0	0	0	296.96	1781.76	DE11	B
DE	DE11B	DEAG_BW1285100000076	DETP_BW1285100000076	SKA KÜLSHEIM	49.6785	9.52314	6500	4724	NO	29.525	0	0	0	171.245	1027.47	DE11	A
DE	DE11B	DEAG_BW1285100000079	DETP_BW1285100000079	SKA LAUDA-GERLACHSHEIM	49.5807	9.70702	34860	19954	NO	124.712	0	0	0	723.332	4339.99	DE11	B
DE	DE11B	DEAG_BW1285100000081	DETP_BW1285100000081	SKA VORBACHZIMMERN	49.4291	9.91537	8900	6310	NO	39.4375	0	0	0	228.737	1372.42	DE11	B
DE	DE11B	DEAG_BW1285100000083	DETP_BW1285100000083	SKA TAUBERBISCHOFSHEIM	49.6343	9.66019	46700	23152	YES	144.7	463.04	347.28	694.56	839.26	5035.56	DE11	B
DE	DE11B	DEAG_BW1285100000085	DETP_BW1285100000085	SKA WEIKERSHEIM	49.4724	9.89359	15000	7839	NO	48.9938	0	0	0	284.164	1704.98	DE11	B
DE	DE11B	DEAG_BW1285100000088	DETP_BW1285100000088	SKA WERTHEIM	49.7841	9.47891	29000	19329	NO	120.806	0	0	0	700.676	4204.06	DE11	A
DE	DE11B	DEAG_BW1285100000089	DETP_BW1285100000089	SKA WERTHEIM-OST	49.7559	9.56737	7000	3349	NO	20.9313	0	0	0	121.401	728.408	DE11	C
DE	DE11B	DEAG_BW1285100000092	DETP_BW1285100000092	SKA WITTIGBACHTAL AZV	49.606	9.81893	8500	2595	NO	16.2188	0	0	0	94.0687	564.412	DE11	C
DE	DE11C	DEAG_BW1355100000050	DETP_BW1355100000050	SKA Giengen, Giengen	48.6141	10.2533	35000	25480	NO	159.25	0	0	0	923.65	5541.9	DE11	A
DE	DE11C	DEAG_BW1355100000057	DETP_BW1355100000057	SKA Mergelstetten, Heidenheim	48.6472	10.157	130000	84394	YES	527.462	1687.88	1265.91	2531.82	3059.28	18355.7	DE11	A
DE	DE11C	DEAG_BW1355100000058	DETP_BW1355100000058	SKA Schnaitheim, Heidenheim	48.6961	10.1633	43500	13943	YES	87.1437	278.86	209.145	418.29	505.434	3032.6	DE11	A
DE	DE11C	DEAG_BW1355100000071	DETP_BW1355100000071	SKA Niederstotzingen, Niederstotzingen	48.5328	10.2428	7800	5921	NO	37.0063	0	0	0	214.636	1287.82	DE11	A
DE	DE11C	DEAG_BW1355100000548	DETP_BW1355100000548	KA Itzelberg, Königsbronn (neu)	48.7316	10.1458	13000	10782	NO	67.3875	0	0	0	390.847	2345.08	DE11	B
DE	DE11D	DEAG_BW1365100000005	DETP_BW1365100000005	SKA Aalen, Aalen	48.8538	10.0977	80000	51756	YES	323.475	1035.12	776.34	1552.68	1876.15	11256.9	DE11	A
DE	DE11D	DEAG_BW1365100000006	DETP_BW1365100000006	SKA Dewangen, Aalen	48.8731	10.0177	5400	4374	NO	27.3375	0	0	0	158.558	951.345	DE11	A
DE	DE11D	DEAG_BW1365100000008	DETP_BW1365100000008	SKA Unterkochen, Aalen	48.8254	10.1185	33000	11883	NO	74.2687	0	0	0	430.759	2584.55	DE11	A
DE	DE11D	DEAG_BW1365100000013	DETP_BW1365100000013	SKA Schwäbisch Gmünd, Schwäbisch Gmünd	48.7867	9.74696	90000	77803	YES	486.269	1556.06	1167.05	2334.09	2820.36	16922.2	DE11	C
DE	DE11D	DEAG_BW1365100000016	DETP_BW1365100000016	SKA Gschwend, Gschwend	48.9225	9.77386	6600	2866	NO	17.9125	0	0	0	103.893	623.355	DE11	C
DE	DE11D	DEAG_BW1365100000025	DETP_BW1365100000025	SKA Lorch-Waldhausen, Lorch	48.7854	9.62794	18000	14531	NO	90.8188	0	0	0	526.749	3160.49	DE11	B
DE	DE11D	DEAG_BW1365100000026	DETP_BW1365100000026	SKA Mutlangen, Mutlangen	48.8296	9.77093	6000	6347	NO	39.6688	0	0	0	230.079	1380.47	DE11	C
DE	DE11D	DEAG_BW1365100000028	DETP_BW1365100000028	SKA Oberkochen, Oberkochen	48.7928	10.125	15000	15020	NO	93.875	0	0	0	544.475	3266.85	DE11	B
DE	DE11D	DEAG_BW1365100000033	DETP_BW1365100000033	SKA Waldstetten, Waldstetten	48.7788	9.81319	7500	11501	NO	71.8813	0	0	0	416.911	2501.47	DE11	B
DE	DE11D	DEAG_BW1365100000035	DETP_BW1365100000035	SKA AZV Lauter-Rems, Böbingen	48.8217	9.89536	41150	40836	YES	255.225	816.72	612.54	1225.08	1480.3	8881.83	DE11	C
DE	DE11D	DEAG_BW1365100000036	DETP_BW1365100000036	SKA AZV Niederalfingen, Aalen	48.8932	10.0647	43000	48821	YES	305.131	976.42	732.315	1464.63	1769.76	10618.6	DE11	C
DE	DE11D	DEAG_BW1365100000037	DETP_BW1365100000037	SKA AZV Leintal, Leinzell	48.8465	9.91797	10000	7682	NO	48.0125	0	0	0	278.472	1670.83	DE11	C
DE	DE11D	DEAG_BW1365100000074	DETP_BW1365100000074	SKA Abtsgmünd, Abtsgmünd	48.9017	9.99112	13000	8926	NO	55.7875	0	0	0	323.567	1941.4	DE11	C
DE	DE11D	DEAG_BW1365100000081	DETP_BW1365100000081	SKA Bopfingen, Bopfingen	48.8479	10.3794	28000	21201	NO	132.506	0	0	0	768.536	4611.22	DE11	A
DE	DE11D	DEAG_BW1365100000088	DETP_BW1365100000088	SKA Schönau, Ellwangen	48.9902	10.1171	32500	27966	NO	174.787	0	0	0	1013.77	6082.6	DE11	B
DE	DE11D	DEAG_BW1365100000091	DETP_BW1365100000091	SKA Haisterhofen, Ellwangen	48.9203	10.1986	20000	16205	NO	101.281	0	0	0	587.431	3524.59	DE11	C
DE	DE13A	DEAG_BW3375100000039	DETP_BW3375100000039	SKA Klettgau -OT Erzingen	47.6308	8.39622	7000	8462	NO	52.8875	0	0	0	306.747	1840.48	DE13	B
DE	DE13A	DEAG_BW3375100000040	DETP_BW3375100000040	SKA Küssaberg	47.6129	8.26975	7500	6679	NO	41.7437	0	0	0	242.114	1452.68	DE13	B
DE	DE13A	DEAG_BW3375100000042	DETP_BW3375100000042	SKA Murg	47.5546	8.01139	11000	11616	NO	72.6	0	0	0	421.08	2526.48	DE13	A
DE	DE13A	DEAG_BW3375100000043	DETP_BW3375100000043	SKA Rickenbach-Wickartsmühle	47.6049	7.98825	5000	6483	NO	40.5188	0	0	0	235.009	1410.05	DE13	C
DE	DE13A	DEAG_BW3375100000049	DETP_BW3375100000049	SKA Stühlingen	47.7316	8.44048	6300	4822	NO	30.1375	0	0	0	174.797	1048.78	DE13	C
DE	DE13A	DEAG_BW3375100000052	DETP_BW3375100000052	SKA Todtmoos	47.7276	7.99874	6000	3260	NO	20.375	0	0	0	118.175	709.05	DE13	C
DE	DE13A	DEAG_BW3375100000056	DETP_BW3375100000056	SKA Waldshut-Tiengen, Waldshut	47.6157	8.1881	23000	13802	NO	86.2625	0	0	0	500.322	3001.93	DE13	A
DE	DE13A	DEAG_BW3375100000058	DETP_BW3375100000058	SKA Wehr, AZV Wehr	47.5823	7.90623	56400	24975	YES	156.094	499.5	374.625	749.25	905.344	5432.06	DE13	A
DE	DE13A	DEAG_BW3375100000059	DETP_BW3375100000059	SKA Wutöschingen, AZV Mittleres Wutachtal	47.6323	8.3441	9000	4660	NO	29.125	0	0	0	168.925	1013.55	DE13	C
DE	DE13A	DEAG_BW3375100000060	DETP_BW3375100000060	SKA Waldshut-Tiengen, AZV Klettgau-West	47.622	8.26292	50000	56224	YES	351.4	1124.48	843.36	1686.72	2038.12	12228.7	DE13	B
DE	DE13A	DEAG_BW3375100000061	DETP BW3375100000061	SKA AZV VORDERES ALBTAL, ALBBRUCK	47.5852	8.12902	14500	9753	NOT KNOWN	60.9563	0	0	0	353.546	2121.28	DE13	B
DE	DE13A	DEAG_BW3375100000063	DETP_BW3375100000063	SKA Bad Säckingen	47.5482	7.93429	47000	42839	YES	267.744	856.78	642.585	1285.17	1552.91	9317.48	DE13	A
DE	DE13A	DEAG_BW3375100000064	DETP_BW3375100000064	SKA Laufenburg	47.5546	8.04009	10000	10081	NO	63.0063	0	0	0	365.436	2192.62	DE13	A
DE	DE13A	DEAG_BW3375100000069	DETP_BW3375100000069	SKA Bernau	47.7888	8.06798	5000	3448	NO	21.55	0	0	0	124.99	749.94	DE13	A
DE	DE13A	DEAG_BW3375100000072	DETP_BW3375100000072	SKA St. Blasien (neue SKA)	47.7496	8.14948	8000	4618	NO	28.8625	0	0	0	167.403	1004.41	DE13	A
DE	DE141	DEAG_BW4155100000025	DETP_BW4155100000025	SKA Mittelstadt	48.5682	9.22703	22500	10776	NO	67.35	0	0	0	390.63	2343.78	DE11	B
DE	DE141	DEAG_BW4155100000026	DETP_BW4155100000026	SKA ENGSTINGEN-KOHLSTETTEN	48.3999	9.33729	7200	6645	NO	41.5312	0	0	0	240.881	1445.29	DE14	B
DE	DE141	DEAG_BW4155100000032	DETP_BW4155100000032	SKA MÜNSINGEN	48.4086	9.45405	22000	17252	NO	107.825	0	0	0	625.385	3752.31	DE14	C
DE	DE141	DEAG_BW4155100000036	DETP_BW4155100000036	SKA PLIEZHAUSEN-RÜBGARTEN	48.5606	9.16465	5000	3277	NO	20.4812	0	0	0	118.791	712.747	DE14	B
DE	DE141	DEAG_BW4155100000037	DETP_BW4155100000037	SKA REUTLINGEN-NORD	48.5525	9.21474	79000	24821	YES	155.131	496.42	372.315	744.63	899.761	5398.57	DE14	A
DE	DE141	DEAG_BW4155100000042	DETP_BW4155100000042	SKA RÖMERSTEIN-BÖHRINGEN	48.4933	9.50476	7300	7025	NO	43.9062	0	0	0	254.656	1527.94	DE14	A
DE	DE141	DEAG_BW4155100000046	DETP_BW4155100000046	AZV OBERES LAUCHERTTAL, MÄGERKINGEN	48.2795	9.21521	24900	21715	NO	135.719	0	0	0	787.169	4723.01	DE14	C
DE	DE141	DEAG_BW4155100000048	DETP_BW4155100000048	SKA ZWIEFALTEN	48.2198	9.48608	19500	10277	NO	64.2313	0	0	0	372.541	2235.25	DE14	C
DE	DE141	DEAG_BW4155100000049	DETP_BW4155100000049	SKA ST. JOHANN-DEGENTAL	48.4113	9.37697	13670	9885	NO	61.7812	0	0	0	358.331	2149.99	DE14	C
DE	DE141	DEAG_BW4155100000050	DETP_BW4155100000050	AZV Ermstal, Metzingen	48.5532	9.27334	120000	86561	YES	541.006	1731.22	1298.41	2596.83	3137.84	18827	DE14	A
DE	DE141	DEAG_BW4155100000051	DETP_BW4155100000051	AZV OBERES ECHAZTAL, PFULLINGEN	48.4806	9.22515	55555	71717	YES	448.231	1434.34	1075.76	2151.51	2599.74	15598.4	DE14	A
DE	DE141	DEAG_BW4155100000052	DETP_BW4155100000052	SKA REUTLINGEN-WEST	48.5036	9.16523	140000	88165	YES	551.031	1763.3	1322.47	2644.95	3195.98	19175.9	DE14	B
DE	DE142	DEAG_BW4165100000054	DETP_BW4165100000054	SKA Bodelshausen	48.4055	8.96024	8500	6551	NO	40.9438	0	0	0	237.474	1424.84	DE14	C
DE	DE142	DEAG_BW4165100000055	DETP_BW4165100000055	AZV Schaichtal; Dettenhausen	48.6063	9.10854	10000	5015	NO	31.3438	0	0	0	181.794	1090.76	DE14	A
DE	DE142	DEAG_BW4165100000056	DETP_BW4165100000056	AZV Unteres Echaztal-Härten; Kirchentellinsfurt	48.54	9.15335	31000	11837	NO	73.9813	0	0	0	429.091	2574.55	DE14	B
DE	DE142	DEAG_BW4165100000057	DETP_BW4165100000057	SKA Rottenburg-Bad Niedernau	48.4629	8.90256	12600	8294	NO	51.8375	0	0	0	300.658	1803.94	DE14	C
DE	DE142	DEAG_BW4165100000059	DETP_BW4165100000059	AZV Bondorf-Hailfingen; Hailfingen	48.535	8.87534	9000	14574	NO	91.0875	0	0	0	528.307	3169.84	DE14	B
DE	DE142	DEAG_BW4165100000060	DETP_BW4165100000060	AZV Raum Ergenzingen; Ergenzingen	48.4814	8.81908	13000	13477	NO	84.2313	0	0	0	488.541	2931.25	DE14	B
DE	DE142	DEAG_BW4165100000063	DETP_BW4165100000063	AZV Börstingen; Börstingen	48.4442	8.81177	7000	7885	NO	49.2812	0	0	0	285.831	1714.99	DE14	B
DE	DE142	DEAG_BW4165100000064	DETP_BW4165100000064	AZV Steinlach-Wiesaz; Dußlingen	48.4811	9.06469	115000	74484	YES	465.525	1489.68	1117.26	2234.52	2700.05	16200.3	DE14	C
DE	DE142	DEAG_BW4165100000065	DETP_BW4165100000065	SKA Rottenburg-Kiebingen	48.4841	8.97841	45800	39282	YES	245.513	785.64	589.23	1178.46	1423.97	8543.84	DE14	C
DE	DE142	DEAG_BW4165100000066	DETP_BW4165100000066	SKA Tübingen	48.5299	9.09727	137500	105108	YES	656.925	2102.16	1576.62	3153.24	3810.16	22861	DE14	A
DE	DE143	DEAG_BW4175100000002	DETP_BW4175100000002	SKA Mühringen (Horb) des AZV Unteres Eyachtal	48.4268	8.76431	10000	8285	NO	51.7812	0	0	0	300.331	1801.99	DE12	B
DE	DE143	DEAG_BW4175100000003	DETP_BW4175100000003	SKA Bisingen	48.3134	8.88223	18700	16078	NO	100.488	0	0	0	582.827	3496.96	DE14	B
DE	DE143	DEAG_BW4175100000004	DETP_BW4175100000004	SKA Burladingen	48.2874	9.14585	24800	16782	NO	104.888	0	0	0	608.347	3650.08	DE14	C
DE	DE11D	DEAG_BW1365100000100	DETP_BW1365100000100	SKA Lauchheim, Lauchheim	48.8733	10.2363	6000	5467	NO	34.1688	0	0	0	198.179	1189.07	DE11	A
DE	DE11D	DEAG_BW1365100000117	DETP_BW1365100000117	SKA Schwabsberg, Rainau	48.9336	10.1371	9250	4632	NO	28.95	0	0	0	167.91	1007.46	DE11	B
DE	DE11D	DEAG_BW1365100000133	DETP_BW1365100000133	SKA Westhausen, Westhausen	48.8943	10.1836	6700	7976	NO	49.85	0	0	0	289.13	1734.78	DE11	B
DE	DE122	DEAG_BW2125100000014	DETP_BW2125100000014	SKA Karlsruhe Neureut	49.0445	8.35939	875000	519247	YES	3245.29	10384.9	7788.7	15577.4	18822.7	112936	DE12	A
DE	DE123	DEAG_BW2155100000015	DETP_BW2155100000015	EGGENSTEIN-LEOPOLDSHAFEN KLA Leopoldshafen	49.1065	8.39803	20000	21379	NO	133.619	0	0	0	774.989	4649.93	DE12	B
DE	DE123	DEAG_BW2155100000016	DETP_BW2155100000016	KRAICHTAL KLA Kraichtal	49.1522	8.65123	21000	25390	NO	158.688	0	0	0	920.387	5522.32	DE12	C
DE	DE123	DEAG_BW2155100000017	DETP_BW2155100000017	LINKENHEIM-HOCHSTETTEN KLA Linkenheim-Hochstetten	49.1446	8.40193	16000	14880	NO	93	0	0	0	539.4	3236.4	DE12	B
DE	DE123	DEAG_BW2155100000018	DETP_BW2155100000018	ÖSTRINGEN KLA Östringen	49.2153	8.68889	12500	10307	NO	64.4188	0	0	0	373.629	2241.77	DE12	B
DE	DE123	DEAG_BW2155100000019	DETP_BW2155100000019	Östringen KLA Odenheim	49.1827	8.72388	8000	10226	NO	63.9125	0	0	0	370.692	2224.15	DE12	C
DE	DE123	DEAG_BW2155100000020	DETP_BW2155100000020	PFINZTAL KLA Berghausen	49.0082	8.51794	19000	23246	NO	145.287	0	0	0	842.667	5056	DE12	A
DE	DE123	DEAG_BW2155100000021	DETP_BW2155100000021	PHILIPPSBURG KLA Philippsburg	49.2446	8.4589	23500	14808	NO	92.55	0	0	0	536.79	3220.74	DE12	A
DE	DE123	DEAG_BW2155100000024	DETP_BW2155100000024	RHEINSTETTEN KLA Mörsch	48.9743	8.28562	14000	17081	NO	106.756	0	0	0	619.186	3715.12	DE12	C
DE	DE123	DEAG_BW2155100000025	DETP_BW2155100000025	STUTENSEE KLA Blankenloch	49.0716	8.4802	15000	11288	NO	70.55	0	0	0	409.19	2455.14	DE12	B
DE	DE123	DEAG_BW2155100000027	DETP_BW2155100000027	UBSTADT-WEIHER KLA Ubstadt-Weiher	49.1838	8.63163	18000	18123	NO	113.269	0	0	0	656.959	3941.75	DE12	B
DE	DE123	DEAG_BW2155100000028	DETP_BW2155100000028	AV ALBTAL KLA Ettlingen-Neurod	48.9187	8.45385	40000	66535	NO	415.844	0	0	0	2411.89	14471.4	DE12	C
DE	DE123	DEAG_BW2155100000029	DETP_BW2155100000029	AV AM WALZBACH KLA Weingarten	49.0714	8.51471	29200	19134	NO	119.587	0	0	0	693.607	4161.64	DE12	B
DE	DE123	DEAG_BW2155100000030	DETP_BW2155100000030	AV KAMMERFORST KLA Karlsdorf-Neuthard	49.1372	8.52393	28500	25597	NO	159.981	0	0	0	927.891	5567.35	DE12	A
DE	DE123	DEAG_BW2155100000031	DETP_BW2155100000031	AV KRAICHBACHNIEDERUNG KLA Kronau	49.2305	8.63979	33000	30158	NO	188.487	0	0	0	1093.23	6559.36	DE12	A
DE	DE123	DEAG_BW2155100000032	DETP_BW2155100000032	AV OBERER KRAICHBACH KLA Flehingen	49.0939	8.75914	35000	26635	NO	166.469	0	0	0	965.519	5793.11	DE12	C
DE	DE123	DEAG_BW2155100000033	DETP_BW2155100000033	AV PFINZ-U. RENNACHTAL KLA Ittersbach	48.8717	8.52036	18000	13862	NO	86.6375	0	0	0	502.498	3014.99	DE12	B
DE	DE123	DEAG_BW2155100000034	DETP_BW2155100000034	AV WAGBACH KLA Waghäusel	49.2582	8.52473	40200	32445	YES	202.781	648.9	486.675	973.35	1176.13	7056.79	DE12	C
DE	DE123	DEAG_BW2155100000035	DETP_BW2155100000035	AV WEIßACH-U. OB.SAALBACHTAL KLA Heidelsheim	49.1129	8.63666	100000	107483	YES	671.769	2149.66	1612.24	3224.49	3896.26	23377.6	DE12	C
DE	DE123	DEAG_BW2155100000036	DETP_BW2155100000036	VG GRABEN-NEUDORF KLA Dettenheim	49.1721	8.40371	30000	21157	NO	132.231	0	0	0	766.941	4601.65	DE12	C
DE	DE123	DEAG_BW2155100000037	DETP_BW2155100000037	BRUCHSAL KLA Bruchsal	49.1417	8.59488	75000	73929	YES	462.056	1478.58	1108.93	2217.87	2679.93	16079.6	DE12	A
DE	DE123	DEAG_BW2155100000038	DETP_BW2155100000038	AV BRUCHNIEDERUNG KLA Oberhausen-Rheinhausen	49.2827	8.50287	26300	21856	NO	136.6	0	0	0	792.28	4753.68	DE12	C
DE	DE124	DEAG_BW2165100000001	DETP_BW2165100000001	KLA HÜGELSHEIM	48.8052	8.1119	10000	4945	NO	30.9062	0	0	0	179.256	1075.54	DE12	B
DE	DE124	DEAG_BW2165100000004	DETP_BW2165100000004	KLA RHEINMÜNSTER-SÖLLINGEN	48.7842	8.05851	13300	5178	NO	32.3625	0	0	0	187.703	1126.21	DE12	B
DE	DE124	DEAG_BW2165100000006	DETP_BW2165100000006	GKA BADEN-BADEN-SINZHEIM	48.7838	8.16085	200000	137766	YES	861.038	2755.32	2066.49	4132.98	4994.02	29964.1	DE12	C
DE	DE124	DEAG_BW2165100000007	DETP_BW2165100000007	AV BÜHL-U. UMGEBUNG KLA VIMBUCH	48.723	8.12354	167000	65570	YES	409.812	1311.4	983.55	1967.1	2376.91	14261.5	DE12	A
DE	DE124	DEAG_BW2165100000009	DETP_BW2165100000009	GVV DURMERSHEIM KLA AU AM RHEIN	48.9614	8.25345	30000	39530	NO	247.062	0	0	0	1432.96	8597.77	DE12	C
DE	DE124	DEAG_BW2165100000010	DETP_BW2165100000010	KLA GERNSBACH AV MITTLERES MURGTAL	48.7763	8.33816	25000	25448	NO	159.05	0	0	0	922.49	5534.94	DE12	B
DE	DE124	DEAG_BW2165100000011	DETP_BW2165100000011	KLA GAGGENAU-ROTENFELS AV MURG	48.8247	8.29119	60000	41444	YES	259.025	828.88	621.66	1243.32	1502.35	9014.07	DE12	A
DE	DE112	DEAG_BW1155100000069	DETP_BW1155100000069	ZV GÄU-AMMER - HERRENBERG	48.5657	8.89871	80000	63953	YES	399.706	1279.06	959.295	1918.59	2318.3	13909.8	DE11	B
DE	DE112	DEAG_BW1155100000080	DETP_BW1155100000080	EHNINGEN	48.6634	8.9182	17100	11038	NO	68.9875	0	0	0	400.127	2400.76	DE11	C
DE	DE112	DEAG_BW1155100000081	DETP_BW1155100000081	LEONBERG - MITTLERES GLEMSTAL	48.8146	9.04241	90000	77225	YES	482.656	1544.5	1158.38	2316.75	2799.41	16796.4	DE11	C
DE	DE112	DEAG_BW1155100000085	DETP_BW1155100000085	MAGSTADT	48.7505	8.9487	18000	13212	NO	82.575	0	0	0	478.935	2873.61	DE11	B
DE	DE112	DEAG_BW1155100000087	DETP_BW1155100000087	RENNINGEN	48.7701	8.92156	25400	16699	NO	104.369	0	0	0	605.339	3632.03	DE11	A
DE	DE112	DEAG_BW1155100000088	DETP_BW1155100000088	RUTESHEIM	48.801	8.94575	11700	11008	NO	68.8	0	0	0	399.04	2394.24	DE11	A
DE	DE113	DEAG_BW1165100000002	DETP_BW1165100000002	AICHWALD - AICHSCHIESS	48.7544	9.40292	5200	5154	NO	32.2125	0	0	0	186.832	1120.99	DE11	C
DE	DE113	DEAG_BW1165100000004	DETP_BW1165100000004	BALTMANNSWEILER	48.7497	9.4538	8000	4996	NO	31.225	0	0	0	181.105	1086.63	DE11	B
DE	DE113	DEAG_BW1165100000006	DETP_BW1165100000006	DEIZISAU	48.7152	9.36041	23300	10605	NO	66.2812	0	0	0	384.431	2306.59	DE11	A
DE	DE113	DEAG_BW1165100000007	DETP_BW1165100000007	DENKENDORF	48.6974	9.33558	15000	9431	NO	58.9438	0	0	0	341.874	2051.24	DE11	A
DE	DE113	DEAG_BW1165100000009	DETP_BW1165100000009	FILDERSTADT - SIELMINGEN	48.6798	9.25063	51100	28944	YES	180.9	578.88	434.16	868.32	1049.22	6295.32	DE11	B
DE	DE113	DEAG_BW1165100000010	DETP_BW1165100000010	FILDERSTADT - BONLANDEN	48.638	9.21916	27500	25301	NO	158.131	0	0	0	917.161	5502.97	DE11	C
DE	DE113	DEAG_BW1165100000011	DETP_BW1165100000011	GROSSBETTLINGEN	48.5939	9.2976	6000	4285	NO	26.7812	0	0	0	155.331	931.987	DE11	B
DE	DE113	DEAG_BW1165100000012	DETP_BW1165100000012	Kirchheim-Nabern	48.6167	9.47162	7500	6011	NO	37.5688	0	0	0	217.899	1307.39	DE11	A
DE	DE113	DEAG_BW1165100000013	DETP_BW1165100000013	LEINFELDEN-ECHTERDINGEN - STETTEN	48.6754	9.18429	22600	15509	NO	96.9312	0	0	0	562.201	3373.21	DE11	A
DE	DE113	DEAG_BW1165100000014	DETP_BW1165100000014	LEINFELDEN-ECHTERDINGEN - MUSBERG	48.68	9.12638	11000	6726	NO	42.0375	0	0	0	243.817	1462.9	DE11	C
DE	DE128	DEAG_BW2265100000011	DETP_BW2265100000011	SKA AZV IM HOLLMUTH Bammental	49.3635	8.78902	39500	22114	YES	138.213	442.28	331.71	663.42	801.632	4809.79	DE12	B
DE	DE128	DEAG_BW2265100000012	DETP_BW2265100000012	SKA AZV MECKESHEIMER CENT Meckesheim	49.3328	8.80635	44000	20680	YES	129.25	413.6	310.2	620.4	749.65	4497.9	DE12	A
DE	DE128	DEAG_BW2265100000013	DETP_BW2265100000013	SKA AZV SCHWARZBACHTAL Neckarbischofsheim	49.3037	8.94094	35000	49170	NO	307.312	0	0	0	1782.41	10694.5	DE12	C
DE	DE128	DEAG_BW2265100000014	DETP_BW2265100000014	SKA AZV WALDANGELBACHTAL Angelbachtal	49.2398	8.76326	10000	10680	NO	66.75	0	0	0	387.15	2322.9	DE12	B
DE	DE128	DEAG_BW2265100000015	DETP_BW2265100000015	SKA Eberbach	49.4586	8.95787	28000	37606	NO	235.038	0	0	0	1363.22	8179.31	DE12	A
DE	DE128	DEAG_BW2265100000016	DETP_BW2265100000016	SKA Hockenheim	49.3299	8.52694	55000	40061	YES	250.381	801.22	600.915	1201.83	1452.21	8713.27	DE12	A
DE	DE128	DEAG_BW2265100000020	DETP_BW2265100000020	SKA Sinsheim	49.256	8.85996	75000	23514	YES	146.963	470.28	352.71	705.42	852.382	5114.29	DE12	A
DE	DE128	DEAG_BW2265100000021	DETP_BW2265100000021	SKA Sinsheim-Hilsbach	49.1859	8.86202	7000	4014	NO	25.0875	0	0	0	145.507	873.045	DE12	C
DE	DE128	DEAG_BW2265100000024	DETP_BW2265100000024	SKA Waibstadt	49.3032	8.90353	41500	41800	YES	261.25	836	627	1254	1515.25	9091.5	DE12	A
DE	DE128	DEAG_BW2265100000025	DETP_BW2265100000025	SKA AV STEINACHTAL Schönau ( Hessen )	49.4141	8.80724	12500	4797	NO	29.9813	0	0	0	173.891	1043.35	DE12	A
DE	DE128	DEAG_BW2265100000030	DETP_BW2265100000030	SKA St.Leon-Rot	49.2789	8.60269	23500	14427	NO	90.1688	0	0	0	522.979	3137.87	DE12	B
DE	DE129	DEAG_BW2315100000061	DETP_BW2315100000061	SKA PFORZHEIM	48.9017	8.73514	250000	208128	YES	1300.8	4162.56	3121.92	6243.84	7544.64	45267.8	DE12	A
DE	DE12A	DEAG_BW2355100000003	DETP_BW2355100000003	SKA NAGOLD	48.5677	8.71725	65000	39333	YES	245.831	786.66	589.995	1179.99	1425.82	8554.93	DE12	B
DE	DE12A	DEAG_BW2355100000005	DETP_BW2355100000005	SKA BAD LIEBENZELL	48.788	8.7266	20000	11413	NO	71.3312	0	0	0	413.721	2482.33	DE12	C
DE	DE12A	DEAG_BW2355100000019	DETP_BW2355100000019	SKA SIMMOZHEIM	48.7492	8.81745	5600	6533	NO	40.8313	0	0	0	236.821	1420.93	DE12	A
DE	DE12A	DEAG_BW2355100000021	DETP_BW2355100000021	SKA WILDBERG	48.6431	8.73672	23000	26924	NO	168.275	0	0	0	975.995	5855.97	DE12	C
DE	DE12A	DEAG_BW2355100000024	DETP_BW2355100000024	SKA CALMBACH	48.7889	8.57759	30000	15236	NO	95.225	0	0	0	552.305	3313.83	DE12	A
DE	DE12A	DEAG_BW2355100000025	DETP_BW2355100000025	SKA UNTERREICHENBACH	48.8325	8.7028	6500	3661	NO	22.8812	0	0	0	132.711	796.267	DE12	B
DE	DE12A	DEAG_BW2355100000026	DETP_BW2355100000026	SKA SCHÖMBERG CW	48.7986	8.65865	25000	6510	NO	40.6875	0	0	0	235.987	1415.92	DE12	C
DE	DE12A	DEAG_BW2355100000042	DETP_BW2355100000042	SKA GECHINGEN	48.6979	8.84609	5000	3747	NO	23.4188	0	0	0	135.829	814.973	DE12	C
DE	DE12A	DEAG_BW2355100000048	DETP_BW2355100000048	SKA HIRSAU	48.7452	8.72994	49500	37483	YES	234.269	749.66	562.245	1124.49	1358.76	8152.55	DE12	A
DE	DE12A	DEAG_BW2355100000051	DETP_BW2355100000051	SKA BAD TEINACH	48.6871	8.69965	6800	7072	NO	44.2	0	0	0	256.36	1538.16	DE12	B
DE	DE12A	DEAG_BW2355100000055	DETP_BW2355100000055	SKA ALTHENGSTETT	48.7206	8.77664	18000	8439	NO	52.7438	0	0	0	305.914	1835.48	DE12	A
DE	DE12A	DEAG_BW2355100000057	DETP_BW2355100000057	SKA ALTENSTEIG	48.5953	8.62515	34000	23908	NO	149.425	0	0	0	866.665	5199.99	DE12	A
DE	DE12B	DEAG_BW2365100000002	DETP_BW2365100000002	SKA ELLMENDINGEN	48.9101	8.56458	28000	11882	NO	74.2625	0	0	0	430.722	2584.33	DE12	C
DE	DE123	DEAG_BW2365100000004	DETP_BW2365100000004	SKA KLEINSTEINBACH	48.9696	8.55356	33000	15941	NO	99.6313	0	0	0	577.861	3467.17	DE12	A
DE	DE12B	DEAG_BW2365100000006	DETP_BW2365100000006	SKA KOENIGSBACH BB	48.9596	8.59022	55000	28003	YES	175.019	560.06	420.045	840.09	1015.11	6090.65	DE12	A
DE	DE12B	DEAG_BW2365100000010	DETP_BW2365100000010	SKA MÖNSHEIM	48.8691	8.87868	7100	5028	NO	31.425	0	0	0	182.265	1093.59	DE12	C
DE	DE12B	DEAG_BW2365100000011	DETP_BW2365100000011	SKA SCHÜTZINGEN	48.9933	8.91441	6700	5337	NO	33.3563	0	0	0	193.466	1160.8	DE12	C
DE	DE12B	DEAG_BW2365100000012	DETP_BW2365100000012	SKA GROSSGLATTBACH	48.9147	8.90921	7500	5365	NO	33.5312	0	0	0	194.481	1166.89	DE12	C
DE	DE12B	DEAG_BW2365100000017	DETP_BW2365100000017	SKA TIEFENBRONN	48.8316	8.78269	21000	14725	NO	92.0312	0	0	0	533.781	3202.69	DE12	C
DE	DE12B	DEAG_BW2365100000065	DETP_BW2365100000065	SKA NEUENBÜRG	48.8527	8.60751	19500	12741	NO	79.6313	0	0	0	461.861	2771.17	DE12	C
DE	DE12B	DEAG_BW2365100000066	DETP_BW2365100000066	SKA NIEFERN	48.9241	8.79128	25000	21750	NO	135.938	0	0	0	788.438	4730.62	DE12	B
DE	DE12B	DEAG_BW2365100000069	DETP_BW2365100000069	SKA Mühlacker-LOMERSHEIM	48.9371	8.87421	40000	27912	NO	174.45	0	0	0	1011.81	6070.86	DE12	A
DE	DE12B	DEAG_BW2365100000071	DETP_BW2365100000071	SKA Mühlacker-ENZBERG	48.9405	8.81096	10000	5681	NO	35.5063	0	0	0	205.936	1235.62	DE12	A
DE	DE12B	DEAG_BW2365100000072	DETP_BW2365100000072	SKA ILLINGEN	48.9464	8.93493	19800	5669	NO	35.4312	0	0	0	205.501	1233.01	DE12	B
DE	DE12B	DEAG_BW2365100000138	DETP_BW2365100000138	SKA FRIOLZHEIM Neu	48.8244	8.83339	6250	5035	NO	31.4688	0	0	0	182.519	1095.11	DE12	C
DE	DE12C	DEAG_BW2375100000001	DETP_BW2375100000001	SKA VÖRBACH	48.5143	8.58391	19000	16481	NO	103.006	0	0	0	597.436	3584.62	DE12	C
DE	DE12C	DEAG_BW2375100000007	DETP_BW2375100000007	SKA GLATTEN	48.4308	8.51618	22000	18741	NO	117.131	0	0	0	679.361	4076.17	DE12	C
DE	DE12C	DEAG_BW2375100000013	DETP_BW2375100000013	SKA BAIERSBRONN	48.5163	8.38387	38600	27214	YES	170.088	544.28	408.21	816.42	986.508	5919.05	DE12	A
DE	DE12C	DEAG_BW2375100000014	DETP_BW2375100000014	SKA AACH	48.459	8.48186	25000	22734	NO	142.088	0	0	0	824.107	4944.64	DE12	B
DE	DE12C	DEAG_BW2375100000015	DETP_BW2375100000015	SKA EUTINGEN	48.473	8.74031	16200	22776	NO	142.35	0	0	0	825.63	4953.78	DE12	A
DE	DE12C	DEAG_BW2375100000089	DETP_BW2375100000089	SKA DETTINGEN	48.4205	8.63845	9000	9240	NO	57.75	0	0	0	334.95	2009.7	DE12	A
DE	DE12C	DEAG_BW2375100000092	DETP_BW2375100000092	SKA HORB	48.4454	8.71145	28000	10513	NO	65.7062	0	0	0	381.096	2286.58	DE12	C
DE	DE12C	DEAG_BW2375100000100	DETP_BW2375100000100	SKA MANBACH	48.4542	8.43836	23000	18321	NO	114.506	0	0	0	664.136	3984.82	DE12	B
DE	DE12C	DEAG_BW2375100000103	DETP_BW2375100000103	SKA SCHÖNMÜNZACH	48.6137	8.364	15000	10608	NO	66.3	0	0	0	384.54	2307.24	DE12	A
DE	DE12C	DEAG_BW2375100000107	DETP_BW2375100000107	SKA ALPIRSBACH	48.3224	8.39432	30500	12916	NO	80.725	0	0	0	468.205	2809.23	DE13	C
DE	DE132	DEAG_BW3155100000002	DETP_BW3155100000002	KA AZV WEILERTAL - NEUENBURG	47.8243	7.56203	62500	45213	YES	282.581	904.26	678.195	1356.39	1638.97	9833.83	DE13	A
DE	DE132	DEAG_BW3155100000003	DETP_BW3155100000003	KA AZV SULZBACH - GRISSHEIM	47.8817	7.5882	40000	14026	YES	87.6625	280.52	210.39	420.78	508.442	3050.65	DE13	C
DE	DE132	DEAG_BW3155100000004	DETP_BW3155100000004	SKA AZV STAUFENER BUCHT-GREZHAUSEN	47.9724	7.63469	114000	70873	YES	442.956	1417.46	1063.1	2126.19	2569.15	15414.9	DE13	C
DE	DE132	DEAG_BW3155100000006	DETP_BW3155100000006	KA AZV HASLACHTAL - LENZKIRCH	47.8641	8.22466	17500	7553	NO	47.2063	0	0	0	273.796	1642.78	DE13	B
DE	DE132	DEAG_BW3155100000009	DETP_BW3155100000009	KA VOGTSBURG - BURKHEIM	48.1022	7.58797	18000	13834	NO	86.4625	0	0	0	501.482	3008.89	DE13	B
DE	DE132	DEAG_BW3155100000011	DETP_BW3155100000011	KA TITISEE-NEUSTADT	47.9021	8.23695	54000	26349	YES	164.681	526.98	395.235	790.47	955.151	5730.91	DE13	A
DE	DE132	DEAG_BW3155100000019	DETP_BW3155100000019	KA SCHLUCHSEE-WOLFSGRUND	47.8199	8.1623	8000	5131	NO	32.0688	0	0	0	185.999	1115.99	DE13	A
DE	DE132	DEAG_BW3155100000031	DETP_BW3155100000031	KA LÖFFINGEN-SEPPENHOFEN	47.8681	8.35948	9360	6535	NO	40.8438	0	0	0	236.894	1421.36	DE13	C
DE	DE132	DEAG_BW3155100000036	DETP_BW3155100000036	KA HINTERZARTEN	47.9109	8.08517	7350	6901	NO	43.1313	0	0	0	250.161	1500.97	DE13	B
DE	DE132	DEAG_BW3155100000037	DETP_BW3155100000037	KA FRIEDENWEILER-RÖTENBACH	47.8894	8.28727	5000	4593	NO	28.7063	0	0	0	166.496	998.977	DE13	A
DE	DE132	DEAG_BW3155100000045	DETP_BW3155100000045	KA BREISACH AM RHEIN	48.0494	7.57963	81000	31224	YES	195.15	624.48	468.36	936.72	1131.87	6791.22	DE13	A
DE	DE132	DEAG_BW3155100000059	DETP_BW3155100000059	KA AZV HOHLEBACHTAL - STEINENSTADT	47.7657	7.53584	16300	11905	NO	74.4062	0	0	0	431.556	2589.34	DE13	C
DE	DE132	DEAG_BW3155100001667	DETP_BW3155100001667	KA BAD BELLINGEN	47.7441	7.54834	15000	6677	NO	41.7313	0	0	0	242.041	1452.25	DE13	C
DE	DE133	DEAG_BW3165100000005	DETP_BW3165100000005	SKA AZV UNTERE ELZ-KÖNDRINGEN	48.1412	7.78213	91700	60929	YES	380.806	1218.58	913.935	1827.87	2208.68	13252.1	DE13	C
DE	DE133	DEAG_BW3165100000007	DETP_BW3165100000007	SKA AZV KAISERSTUHL NORD-WYHL	48.1806	7.64953	14300	9203	NO	57.5188	0	0	0	333.609	2001.65	DE13	C
DE	DE133	DEAG_BW3165100000008	DETP_BW3165100000008	SKA AZV BREISGAUER BUCHT - KA FORCHHEIM	48.1893	7.70973	600000	524561	YES	3278.51	10491.2	7868.41	15736.8	19015.3	114092	DE13	A
DE	DE133	DEAG_BW3165100000012	DETP_BW3165100000012	SKA WINDEN-NIEDERWINDEN	48.137	8.01009	5000	5540	NO	34.625	0	0	0	200.825	1204.95	DE13	C
DE	DE133	DEAG_BW3165100000020	DETP_BW3165100000020	SKA SASBACH	48.1445	7.60624	8000	3963	NO	24.7688	0	0	0	143.659	861.952	DE13	B
DE	DE133	DEAG_BW3165100000021	DETP_BW3165100000021	SKA RHEINHAUSEN - NIEDERHAUSEN	48.243	7.71113	5000	3651	NO	22.8187	0	0	0	132.349	794.092	DE13	A
DE	DE133	DEAG_BW3165100000023	DETP_BW3165100000023	SKA Kenzingen	48.2001	7.7561	13000	13343	NO	83.3937	0	0	0	483.684	2902.1	DE13	B
DE	DE133	DEAG_BW3165100000025	DETP_BW3165100000025	SKA HERBOLZHEIM	48.2261	7.75466	15000	8925	NO	55.7812	0	0	0	323.531	1941.19	DE13	A
DE	DE133	DEAG_BW3165100000046	DETP_BW3165100000046	SKA ELZACH	48.1669	8.05832	15000	10973	NO	68.5812	0	0	0	397.771	2386.63	DE13	A
DE	DE134	DEAG_BW3175100000001	DETP_BW3175100000001	SKA AWV RAUM OFFENBURG	48.5193	7.91519	200000	105989	YES	662.431	2119.78	1589.84	3179.67	3842.1	23052.6	DE13	C
DE	DE134	DEAG_BW3175100000002	DETP_BW3175100000002	SKA AWV RAUMSCHAFT LAHR	48.3458	7.82316	100000	81846	YES	511.537	1636.92	1227.69	2455.38	2966.92	17801.5	DE13	A
DE	DE134	DEAG_BW3175100000003	DETP_BW3175100000003	SKA KEHL	48.6184	7.84203	48000	52416	YES	327.6	1048.32	786.24	1572.48	1900.08	11400.5	DE13	C
DE	DE134	DEAG_BW3175100000004	DETP_BW3175100000004	SKA AZV KINZIG HARMERSBACHTAL	48.3517	8.02216	46100	43262	YES	270.387	865.24	648.93	1297.86	1568.25	9409.48	DE13	C
DE	DE134	DEAG_BW3175100000005	DETP_BW3175100000005	SKA AWV VORDERES RENCHTAL	48.6031	8.00693	28000	23192	NO	144.95	0	0	0	840.71	5044.26	DE13	C
DE	DE134	DEAG_BW3175100000006	DETP_BW3175100000006	SKA AWV HAUSACH HORNBERG	48.2838	8.13989	39600	41112	YES	256.95	822.24	616.68	1233.36	1490.31	8941.86	DE13	A
DE	DE134	DEAG_BW3175100000007	DETP_BW3175100000007	SKA GENGENBACH	48.4165	7.99179	33500	18581	NO	116.131	0	0	0	673.561	4041.37	DE13	A
DE	DE134	DEAG_BW3175100000008	DETP_BW3175100000008	SKA AWV SÜDLICHE ORTENAU	48.3134	7.74594	64000	51285	YES	320.531	1025.7	769.275	1538.55	1859.08	11154.5	DE13	C
DE	DE134	DEAG_BW3175100000009	DETP_BW3175100000009	SKA AWV OBERES RENCHTAL	48.4994	8.13764	24900	8912	NO	55.7	0	0	0	323.06	1938.36	DE13	C
DE	DE134	DEAG_BW3175100000010	DETP_BW3175100000010	SKA ACHERN	48.6378	8.06594	30200	23700	NO	148.125	0	0	0	859.125	5154.75	DE13	A
DE	DE134	DEAG_BW3175100000011	DETP_BW3175100000011	SKA OBERKIRCH	48.5415	8.05415	18000	23441	NO	146.506	0	0	0	849.736	5098.42	DE13	C
DE	DE134	DEAG_BW3175100000012	DETP_BW3175100000012	SKA APPENWEIER URLOFFEN	48.5675	7.96516	12300	15705	NO	98.1562	0	0	0	569.306	3415.84	DE13	B
DE	DE134	DEAG_BW3175100000013	DETP_BW3175100000013	SKA AWV FRIESENHEIM	48.3961	7.85419	23950	18873	NO	117.956	0	0	0	684.146	4104.88	DE13	C
DE	DE134	DEAG_BW3175100000014	DETP_BW3175100000014	SKA AWV SASBACHTAL	48.6647	8.07557	17000	14922	NO	93.2625	0	0	0	540.923	3245.53	DE13	C
DE	DE134	DEAG_BW3175100000015	DETP_BW3175100000015	SKA AWV ACHERTAL	48.5985	8.1089	28400	25339	NO	158.369	0	0	0	918.539	5511.23	DE13	A
DE	DE134	DEAG_BW3175100000016	DETP_BW3175100000016	SKA AWV NEURIED SCHUTTERWALD	48.4802	7.80347	25000	21663	NO	135.394	0	0	0	785.284	4711.7	DE13	C
DE	DE134	DEAG_BW3175100000018	DETP_BW3175100000018	SKA RHEINAU FREISTETT	48.6843	7.94896	13500	10653	NO	66.5812	0	0	0	386.171	2317.03	DE13	C
DE	DE134	DEAG_BW3175100000019	DETP_BW3175100000019	SKA SCHWANAU SÜD -NONNENWEIER-	48.3594	7.75064	6000	5771	NO	36.0688	0	0	0	209.199	1255.19	DE13	C
DE	DE135	DEAG_BW3255100000006	DETP_BW3255100000006	SKA AICHHALDEN	48.2609	8.39799	5830	4841	NO	30.2562	0	0	0	175.486	1052.92	DE13	B
DE	DE135	DEAG_BW3255100000007	DETP_BW3255100000007	SKA BERGFELDEN AV OBERES MÜHLBACHTAL	48.3535	8.68196	7600	8789	NO	54.9313	0	0	0	318.601	1911.61	DE13	B
DE	DE135	DEAG_BW3255100000008	DETP_BW3255100000008	SKA BÖSINGEN	48.2393	8.56677	6000	2825	NO	17.6562	0	0	0	102.406	614.438	DE13	A
DE	DE135	DEAG_BW3255100000009	DETP_BW3255100000009	SKA BÖHRINGEN AZV UNTERES SCHLICHEMTAL	48.239	8.65497	8400	4148	NO	25.925	0	0	0	150.365	902.19	DE13	B
DE	DE135	DEAG_BW3255100000011	DETP_BW3255100000011	SKA FISCHINGEN, AV EMPFINGEN	48.3967	8.66558	8100	6886	NO	43.0375	0	0	0	249.617	1497.7	DE13	C
DE	DE135	DEAG_BW3255100000013	DETP_BW3255100000013	SKA GLATT AV UNTERES GLATTAL	48.3955	8.64187	10500	8895	NO	55.5938	0	0	0	322.444	1934.66	DE13	C
DE	DE135	DEAG_BW3255100000015	DETP_BW3255100000015	SKA HORGEN ZVA ESCHACHTAL	48.1371	8.56447	32000	36290	NO	226.812	0	0	0	1315.51	7893.07	DE13	C
DE	DE135	DEAG_BW3255100000017	DETP_BW3255100000017	SKA NEUFRA	48.1335	8.65605	39000	34113	NO	213.206	0	0	0	1236.6	7419.58	DE13	C
DE	DE135	DEAG_BW3255100000018	DETP_BW3255100000018	SKA ROTTWEIL	48.1729	8.63497	52000	48277	YES	301.731	965.54	724.155	1448.31	1750.04	10500.2	DE13	A
DE	DE135	DEAG_BW3255100000020	DETP_BW3255100000020	SKA SCHILTACH OBERES KINZIGTAL	48.2936	8.30662	15000	6107	NO	38.1688	0	0	0	221.379	1328.27	DE13	C
DE	DE135	DEAG_BW3255100000021	DETP_BW3255100000021	SKA SULZ	48.3682	8.64453	10500	13041	NO	81.5063	0	0	0	472.736	2836.42	DE13	A
DE	DE135	DEAG_BW3255100000022	DETP_BW3255100000022	SKA SCHRAMBERG	48.2451	8.37556	41400	22602	YES	141.263	452.04	339.03	678.06	819.323	4915.94	DE13	C
DE	DE135	DEAG_BW3255100000026	DETP_BW3255100000026	SKA VILLINGENDORF	48.2023	8.59449	6000	2608	NO	16.3	0	0	0	94.54	567.24	DE13	A
DE	DE135	DEAG_BW3255100000056	DETP_BW3255100000056	SKA AISTAIG	48.3203	8.58581	35500	24428	NO	152.675	0	0	0	885.515	5313.09	DE13	C
DE	DE135	DEAG_BW3255100000057	DETP_BW3255100000057	SKA DEISSLINGEN AZV OBERER NECKAR VS	48.0875	8.58151	75000	59268	YES	370.425	1185.36	889.02	1778.04	2148.47	12890.8	DE13	B
DE	DE136	DEAG_BW3265100000001	DETP_BW3265100000001	SKA Villingen	48.0412	8.46787	70500	53534	YES	334.588	1070.68	803.01	1606.02	1940.61	11643.6	DE13	A
DE	DE136	DEAG_BW3265100000002	DETP_BW3265100000002	SKA St. Georgen-Peterzell	48.1238	8.38587	24000	14110	NO	88.1875	0	0	0	511.488	3068.92	DE13	A
DE	DE136	DEAG_BW3265100000003	DETP_BW3265100000003	SKA Furtwangen	48.0466	8.22072	17500	15004	NO	93.775	0	0	0	543.895	3263.37	DE13	A
DE	DE136	DEAG_BW3265100000004	DETP_BW3265100000004	SKA Blumberg-Achdorf	47.8314	8.50567	25800	17520	NO	109.5	0	0	0	635.1	3810.6	DE13	C
DE	DE136	DEAG_BW3265100000013	DETP_BW3265100000013	SKA Triberg-Gremmelsbach	48.1612	8.23766	16000	22190	NO	138.688	0	0	0	804.388	4826.32	DE13	C
DE	DE136	DEAG_BW3265100000014	DETP_BW3265100000014	SKA Hammereisenbach	47.9935	8.34606	7000	5521	NO	34.5063	0	0	0	200.136	1200.82	DE13	C
DE	DE136	DEAG_BW3265100000015	DETP_BW3265100000015	SKA Unterbaldingen	47.9578	8.61824	9500	6933	NO	43.3313	0	0	0	251.321	1507.93	DE13	C
DE	DE136	DEAG_BW3265100000016	DETP_BW3265100000016	SKA Donaueschingen	47.9498	8.52274	120000	89019	YES	556.369	1780.38	1335.29	2670.57	3226.94	19361.6	DE13	A
DE	DE137	DEAG_BW3275100000030	DETP_BW3275100000030	SKA Egesheim GVV Heuberg	48.1115	8.86698	19100	13026	NO	81.4125	0	0	0	472.192	2833.15	DE13	C
DE	DE137	DEAG_BW3275100000031	DETP_BW3275100000031	SKA Emmingen	47.9363	8.86771	7500	6181	NO	38.6313	0	0	0	224.061	1344.37	DE13	A
DE	DE137	DEAG_BW3275100000033	DETP_BW3275100000033	SKA Fridingen	48.0125	8.92087	5300	2514	NO	15.7125	0	0	0	91.1325	546.795	DE13	B
DE	DE137	DEAG_BW3275100000034	DETP_BW3275100000034	SKA Immendingen GVV Immendingen-Geisingen	47.9328	8.74714	25500	11940	NO	74.625	0	0	0	432.825	2596.95	DE13	B
DE	DE137	DEAG_BW3275100000039	DETP_BW3275100000039	SKA Möhringen	47.9692	8.78506	7500	5644	NO	35.275	0	0	0	204.595	1227.57	DE13	A
DE	DE137	DEAG_BW3275100000040	DETP_BW3275100000040	SKA Mühlheim	48.0336	8.89445	11000	6550	NO	40.9375	0	0	0	237.438	1424.62	DE13	B
DE	DE137	DEAG_BW3275100000045	DETP_BW3275100000045	SKA Spaichingen	48.0876	8.72633	23000	21854	NO	136.588	0	0	0	792.207	4753.24	DE13	B
DE	DE137	DEAG_BW3275100000046	DETP_BW3275100000046	SKA Seitingen AZV Ostbaar	48.0127	8.73105	7000	4421	NO	27.6312	0	0	0	160.261	961.567	DE13	B
DE	DE137	DEAG_BW3275100000048	DETP_BW3275100000048	SKA Trossingen	48.081	8.6534	21700	17902	NO	111.888	0	0	0	648.947	3893.68	DE13	A
DE	DE137	DEAG_BW3275100000049	DETP_BW3275100000049	SKA Tuttlingen	48.0027	8.83969	75000	43433	YES	271.456	868.66	651.495	1302.99	1574.45	9446.68	DE13	B
DE	DE137	DEAG_BW3275100000050	DETP_BW3275100000050	SKA Weilheim GKW Faulenbachtal	48.0195	8.77689	7500	4492	NO	28.075	0	0	0	162.835	977.01	DE13	B
DE	DE138	DEAG_BW3355100000005	DETP_BW3355100000005	SKA Konstanz	47.6778	9.14198	215000	168417	YES	1052.61	3368.34	2526.26	5052.51	6105.12	36630.7	DE13	A
DE	DE138	DEAG_BW3355100000016	DETP_BW3355100000016	SKA Gailingen	47.6934	8.75012	5700	2531	NO	15.8188	0	0	0	91.7488	550.493	DE13	A
DE	DE138	DEAG_BW3355100000017	DETP_BW3355100000017	SKA Steisslingen	47.7811	8.92757	6000	3811	NO	23.8187	0	0	0	138.149	828.892	DE13	A
DE	DE138	DEAG_BW3355100000019	DETP_BW3355100000019	VKA Stockacher Aach	47.815	9.02273	69000	43023	YES	268.894	860.46	645.345	1290.69	1559.58	9357.5	DE13	C
DE	DE138	DEAG_BW3355100000020	DETP_BW3355100000020	VKA Untere Radolfzeller Aach/Moos	47.7174	8.93866	20000	15699	NO	98.1187	0	0	0	569.089	3414.53	DE13	B
DE	DE138	DEAG_BW3355100000021	DETP_BW3355100000021	SKA Gaienhofen	47.6814	8.98494	7350	7536	NO	47.1	0	0	0	273.18	1639.08	DE13	A
DE	DE139	DEAG_BW3365100000001	DETP_BW3365100000001	SKA BÄNDLEGRUND	47.6152	7.58217	290000	109786	YES	686.163	2195.72	1646.79	3293.58	3979.74	23878.5	DE13	A
DE	DE139	DEAG_BW3365100000003	DETP_BW3365100000003	SKA STEINEN	47.6388	7.7361	75000	46302	YES	289.387	926.04	694.53	1389.06	1678.45	10070.7	DE13	A
DE	DE139	DEAG_BW3365100000012	DETP_BW3365100000012	SKA WEMBACH	47.7719	7.88801	14200	7585	NO	47.4062	0	0	0	274.956	1649.74	DE13	A
DE	DE139	DEAG_BW3365100000013	DETP_BW3365100000013	SKA RHEINFELDEN	47.5457	7.74695	47000	36738	YES	229.612	734.76	551.07	1102.14	1331.75	7990.51	DE13	A
DE	DE139	DEAG_BW3365100000016	DETP_BW3365100000016	SKA KANDERN-HAMMERSTEIN	47.6866	7.64278	10000	5202	NO	32.5125	0	0	0	188.572	1131.43	DE13	C
DE	DE139	DEAG_BW3365100000021	DETP_BW3365100000021	SKA TODTNAU	47.8125	7.93707	18000	9710	NO	60.6875	0	0	0	351.987	2111.92	DE13	C
DE	DE139	DEAG_BW3365100000023	DETP_BW3365100000023	SKA SCHWÖRSTADT	47.5887	7.85715	13660	7614	NO	47.5875	0	0	0	276.007	1656.05	DE13	C
DE	DE13A	DEAG_BW3375100000010	DETP_BW3375100000010	SKA Bonndorf	47.7819	8.40072	10300	8830	NO	55.1875	0	0	0	320.087	1920.52	DE13	C
DE	DE13A	DEAG_BW3375100000034	DETP_BW3375100000034	SKA Hohentengen	47.5736	8.41147	16000	15303	NO	95.6438	0	0	0	554.734	3328.4	DE13	C
DE	DE13A	DEAG_BW3375100000037	DETP_BW3375100000037	SKA Jestetten	47.6514	8.60308	6400	5949	NO	37.1812	0	0	0	215.651	1293.91	DE13	B
DE	DE13A	DEAG_BW3375100000038	DETP_BW3375100000038	SKA Klettgau- OTGeißlingen	47.6145	8.38219	7000	5746	NO	35.9125	0	0	0	208.292	1249.75	DE13	C
DE	DE143	DEAG_BW4175100000008	DETP_BW4175100000008	SKA Karlstal (Haigerloch)	48.3803	8.79232	12500	12378	NO	77.3625	0	0	0	448.702	2692.21	DE14	C
DE	DE143	DEAG_BW4175100000010	DETP_BW4175100000010	SKA Hechingen	48.3683	8.95336	57200	38936	YES	243.35	778.72	584.04	1168.08	1411.43	8468.58	DE14	B
DE	DE143	DEAG_BW4175100000011	DETP_BW4175100000011	SKA Unterdigisheim (Meßstetten)	48.1521	8.90423	12000	8541	NO	53.3813	0	0	0	309.611	1857.67	DE14	C
DE	DE143	DEAG_BW4175100000013	DETP_BW4175100000013	SKA Rangendingen	48.3894	8.873	6000	5870	NO	36.6875	0	0	0	212.787	1276.72	DE14	C
DE	DE143	DEAG_BW4175100000014	DETP_BW4175100000014	SKA Bietenhausen (Rangend.) des AZV Starzeltal Hirrlingen	48.4132	8.86939	5000	4557	NO	28.4813	0	0	0	165.191	991.147	DE14	C
DE	DE143	DEAG_BW4175100000015	DETP_BW4175100000015	SKA Rosenfeld	48.2902	8.74486	6500	5879	NO	36.7437	0	0	0	213.114	1278.68	DE14	B
DE	DE143	DEAG_BW4175100000019	DETP_BW4175100000019	SKA Schömberg des GVV Oberes Schlichemtal	48.2226	8.76386	6500	11153	NO	69.7062	0	0	0	404.296	2425.78	DE14	C
DE	DE143	DEAG_BW4175100000020	DETP_BW4175100000020	SKA Kaiseringen (Straßberg) des AZV Schmeietal	48.1545	9.10576	16000	7730	NO	48.3125	0	0	0	280.212	1681.27	DE14	C
DE	DE143	DEAG_BW4175100000021	DETP_BW4175100000021	SKA Lautlingen (Albstadt) des AZV Oberes Eyachtal	48.2157	8.9415	36000	13119	NO	81.9938	0	0	0	475.564	2853.38	DE14	A
DE	DE143	DEAG_BW4175100000023	DETP_BW4175100000023	SKA Balingen des ZVA Balingen	48.2965	8.85928	124000	61039	YES	381.494	1220.78	915.585	1831.17	2212.66	13276	DE14	B
DE	DE143	DEAG_BW4175100000024	DETP_BW4175100000024	SKA Ebingen (Albstadt)	48.1993	9.0513	125000	55482	YES	346.762	1109.64	832.23	1664.46	2011.22	12067.3	DE14	A
DE	DE145	DEAG_BW4255100000001	DETP_BW4255100000001	SKA Halzhausen	48.5304	9.9298	16000	19857	NO	124.106	0	0	0	719.816	4318.9	DE14	B
DE	DE145	DEAG_BW4255100000009	DETP_BW4255100000009	SKA Öpfingen	48.2863	9.8139	6000	5579	NO	34.8687	0	0	0	202.239	1213.43	DE14	B
DE	DE145	DEAG_BW4255100000012	DETP_BW4255100000012	SKA Schelklingen	48.3788	9.74954	10000	7980	NO	49.875	0	0	0	289.275	1735.65	DE14	A
DE	DE145	DEAG_BW4255100000014	DETP_BW4255100000014	SKA Rottenacker	48.237	9.70485	25000	21123	NO	132.019	0	0	0	765.709	4594.25	DE14	B
DE	DE145	DEAG_BW4255100000017	DETP_BW4255100000017	SKA Westerheim	48.5064	9.61332	5500	3678	NO	22.9875	0	0	0	133.327	799.965	DE14	B
DE	DE145	DEAG_BW4255100000021	DETP_BW4255100000021	SKA Bernstadt	48.5095	10.0116	6000	4290	NO	26.8125	0	0	0	155.512	933.075	DE14	C
DE	DE145	DEAG_BW4255100000022	DETP_BW4255100000022	SKA Blaubeuren-Gerhausen	48.397	9.81445	14500	8523	NO	53.2688	0	0	0	308.959	1853.75	DE14	A
DE	DE145	DEAG_BW4255100000023	DETP_BW4255100000023	SKA Ehingen	48.2717	9.73298	45000	38735	YES	242.094	774.7	581.025	1162.05	1404.14	8424.86	DE14	A
DE	DE145	DEAG_BW4255100000027	DETP_BW4255100000027	SKA Erbach	48.3257	9.90631	25000	18924	NO	118.275	0	0	0	685.995	4115.97	DE14	A
DE	DE145	DEAG_BW4255100000028	DETP_BW4255100000028	SKA Heroldstatt	48.4418	9.67909	7100	3306	NO	20.6625	0	0	0	119.843	719.055	DE14	B
DE	DE145	DEAG_BW4255100000029	DETP_BW4255100000029	SKA Laichingen	48.4941	9.70351	35000	25365	NO	158.531	0	0	0	919.481	5516.89	DE14	A
DE	DE145	DEAG_BW4255100000031	DETP_BW4255100000031	SKA Langenau	48.4997	10.14	16600	14715	NO	91.9688	0	0	0	533.419	3200.51	DE14	A
DE	DE146	DEAG_BW4265100000001	DETP_BW4265100000001	SKA TANNHEIM	48.0115	10.1149	13300	13845	NO	86.5312	0	0	0	501.881	3011.29	DE14	C
DE	DE124	DEAG_BW2165100000012	DETP_BW2165100000012	KLA RASTATT AV MURG	48.8836	8.20068	140000	131714	YES	823.213	2634.28	1975.71	3951.42	4774.63	28647.8	DE12	C
DE	DE124	DEAG_BW2165100000013	DETP_BW2165100000013	AV SCHWARZWASSER KLA LICHTENAU	48.7388	7.99163	19000	10125	NO	63.2812	0	0	0	367.031	2202.19	DE12	C
DE	DE124	DEAG_BW2165100000039	DETP_BW2165100000039	KLA Forbach Bermersbach	48.7011	8.35163	7000	3017	NO	18.8562	0	0	0	109.366	656.197	DE12	C
DE	DE124	DEAG_BW2165100000040	DETP_BW2165100000040	KLA IFFEZHEIM	48.8301	8.14345	11500	5952	NO	37.2	0	0	0	215.76	1294.56	DE12	B
DE	DE125	DEAG_BW2215100000002	DETP_BW2215100000002	SKA AZV HEIDELBERG	49.435	8.65195	360000	215042	YES	1344.01	4300.84	3225.63	6451.26	7795.27	46771.6	DE12	B
DE	DE126	DEAG_BW2225100000001	DETP_BW2225100000001	Kläranlage Mannheim	49.5655	8.4257	725000	517255	YES	3232.84	10345.1	7758.82	15517.6	18750.5	112503	DE12	A
DE	DE127	DEAG_BW2255100000005	DETP_BW2255100000005	SKA BCH-Buchen	49.5332	9.30964	28000	7248	NO	45.3	0	0	0	262.74	1576.44	DE12	C
DE	DE127	DEAG_BW2255100000010	DETP_BW2255100000010	SKA HSH-Haßmersheim	49.3131	9.13739	6000	4731	NO	29.5687	0	0	0	171.499	1028.99	DE12	A
DE	DE127	DEAG_BW2255100000017	DETP_BW2255100000017	Mudau-Donebach	49.547	9.20912	5380	10963	NO	68.5187	0	0	0	397.409	2384.45	DE12	C
DE	DE127	DEAG_BW2255100000031	DETP_BW2255100000031	SKA WAD-Walldürn	49.5953	9.3542	15000	10000	NO	62.5	0	0	0	362.5	2175	DE12	B
DE	DE127	DEAG_BW2255100000042	DETP_BW2255100000042	SKA HDH-Hardheim	49.6223	9.4477	30000	32440	NO	202.75	0	0	0	1175.95	7055.7	DE12	C
DE	DE127	DEAG_BW2255100000043	DETP_BW2255100000043	SKA BIL-Allfeld Schefflenztal	49.3092	9.24647	19000	10251	NO	64.0688	0	0	0	371.599	2229.59	DE12	C
DE	DE127	DEAG_BW2255100000044	DETP_BW2255100000044	SKA OBH-Obrigheim Elz-Neckar	49.366	9.08324	70000	23508	YES	146.925	470.16	352.62	705.24	852.165	5112.99	DE12	B
DE	DE127	DEAG_BW2255100000045	DETP_BW2255100000045	SKA FAB-Fahrenbach	49.4261	9.16754	6000	2044	NO	12.775	0	0	0	74.095	444.57	DE12	C
DE	DE128	DEAG_BW2265100000005	DETP_BW2265100000005	SKA AV BERGSTRASSE Weinheim	49.5659	8.61466	200000	179206	YES	1120.04	3584.12	2688.09	5376.18	6496.22	38977.3	DE12	C
DE	DE128	DEAG_BW2265100000006	DETP_BW2265100000006	SKA AHW WIESLOCH	49.3027	8.66868	110000	89745	YES	560.906	1794.9	1346.17	2692.35	3253.26	19519.5	DE12	A
DE	DE128	DEAG_BW2265100000007	DETP_BW2265100000007	SKA ZV BEZIRK SCHWETZINGEN Ketsch	49.3838	8.52574	120000	90681	YES	566.756	1813.62	1360.21	2720.43	3287.19	19723.1	DE12	B
DE	DE128	DEAG_BW2265100000008	DETP_BW2265100000008	SKA AZV UNTERE HARDT St.Ilgen	49.3513	8.66532	125000	75245	YES	470.281	1504.9	1128.67	2257.35	2727.63	16365.8	DE12	B
DE	DE128	DEAG_BW2265100000009	DETP_BW2265100000009	SKA AV UNTERER NECKAR Neckarhausen	49.4744	8.58095	80000	63133	YES	394.581	1262.66	946.995	1893.99	2288.57	13731.4	DE12	B
DE	DE147	DEAG_BW4355100000012	DETP_BW4355100000012	SKA Friedrichshafen	47.6487	9.50719	87000	63897	YES	399.356	1277.94	958.455	1916.91	2316.27	13897.6	DE14	A
DE	DE147	DEAG_BW4355100000030	DETP_BW4355100000030	SKA OBERTEURINGEN	47.7102	9.46236	5700	5691	NO	35.5688	0	0	0	206.299	1237.79	DE14	C
DE	DE147	DEAG_BW4355100000032	DETP_BW4355100000032	SKA UNTERSIGGINGEN	47.7769	9.37086	8000	8341	NO	52.1313	0	0	0	302.361	1814.17	DE14	B
DE	DE148	DEAG_BW4365100000015	DETP_BW4365100000015	SKA HASLACHMÜHLE	47.8202	9.46016	13200	8262	NO	51.6375	0	0	0	299.497	1796.98	DE14	C
DE	DE148	DEAG_BW4365100000019	DETP_BW4365100000019	SKA WANGEN I.A.	47.6543	9.74171	86500	49167	YES	307.294	983.34	737.505	1475.01	1782.3	10693.8	DE14	C
DE	DE148	DEAG_BW4365100000020	DETP_BW4365100000020	SKA LEUTKIRCH	47.8435	10.0084	100000	91654	YES	572.837	1833.08	1374.81	2749.62	3322.46	19934.7	DE14	A
DE	DE275	DEAG_BYDON-K0163	DETP_BYDON-K0163	Friedberg-Nord	48.4208	10.9447	10000	5515	NO	34.4688	0	0	0	199.919	1199.51	DE27	C
DE	DE275	DEAG_BYDON-K0164	DETP_BYDON-K0164	Aichach	49.7707	10.153	35000	44230	NO	276.438	0	0	0	1603.34	9620.02	DE26	A
DE	DE27D	DEAG_BYDON-K0169	DETP_BYDON-K0169	AZV Mittlere Wörnitz	48.8526	10.658	20000	14877	NO	92.9813	0	0	0	539.291	3235.75	DE27	C
DE	DE277		DETP_BYDON-K0170	ZV Härtsfeld-Württemberg	48.6639	10.3905	25000	23838	NO	148.988	0	0	0	864.128	5184.76	DE27	C
DE	DE148	DEAG_BW4365100000024	DETP_BW4365100000024	SKA ETTISHOFEN	47.8235	9.61264	25000	16102	YES	100.638	322.04	241.53	483.06	583.697	3502.18	DE14	B
DE	DE148	DEAG_BW4365100000025	DETP_BW4365100000025	SKA LANGWIESE	47.7478	9.57653	184000	238961	YES	1493.51	4779.22	3584.41	7168.83	8662.34	51974	DE14	A
DE	DE148	DEAG_BW4365100000026	DETP_BW4365100000026	SKA VOGT	47.7597	9.7722	9200	9497	NO	59.3562	0	0	0	344.266	2065.6	DE14	C
DE	DE148	DEAG_BW4365100000027	DETP_BW4365100000027	SKA BODNEGG	47.7132	9.66811	6000	6182	NO	38.6375	0	0	0	224.097	1344.59	DE14	C
DE	DE148	DEAG_BW4365100000029	DETP_BW4365100000029	SKA SCHLIER	47.7866	9.65794	9500	6673	NO	41.7063	0	0	0	241.896	1451.38	DE14	C
DE	DE148	DEAG_BW4365100000035	DETP_BW4365100000035	SKA REUTE	47.8986	9.69172	8000	3942	NO	24.6375	0	0	0	142.898	857.385	DE14	A
DE	DE148	DEAG_BW4365100000038	DETP_BW4365100000038	SKA KISSLEGG	47.7778	9.88758	19500	14056	NO	87.85	0	0	0	509.53	3057.18	DE14	B
DE	DE148	DEAG_BW4365100000040	DETP_BW4365100000040	SKA AULENDORF	47.9321	9.64514	19000	9757	NO	60.9812	0	0	0	353.691	2122.15	DE14	B
DE	DE148	DEAG_BW4365100000042	DETP_BW4365100000042	SKA BAD WALDSEE	47.9162	9.72172	25000	15396	NO	96.225	0	0	0	558.105	3348.63	DE14	C
DE	DE148	DEAG_BW4365100000043	DETP_BW4365100000043	SKA BAD WURZACH	47.8851	9.91083	25000	15051	NO	94.0688	0	0	0	545.599	3273.59	DE14	C
DE	DE148	DEAG_BW4365100000044	DETP_BW4365100000044	SKA BERGATREUTE	47.8476	9.72181	5000	3111	NO	19.4438	0	0	0	112.774	676.642	DE14	C
DE	DE148	DEAG_BW4365100000045	DETP_BW4365100000045	SKA DÜRREN	47.7346	9.88884	8350	5857	NO	36.6063	0	0	0	212.316	1273.9	DE14	C
DE	DE148	DEAG_BW4365100000049	DETP_BW4365100000049	SKA ALTSHAUSEN	47.9326	9.55161	6700	4686	NO	29.2875	0	0	0	169.867	1019.2	DE14	A
DE	DE148	DEAG_BW4365100000057	DETP_BW4365100000057	SKA RIED	47.7081	10.0058	40000	33469	YES	209.181	669.38	502.035	1004.07	1213.25	7279.51	DE14	C
DE	DE149	DEAG_BW4375100000007	DETP_BW4375100000007	SKA SIGMARINGENDORF	48.066	9.27967	11900	10234	NO	63.9625	0	0	0	370.983	2225.89	DE14	B
DE	DE149	DEAG_BW4375100000008	DETP_BW4375100000008	SKA VERINGENDORF	48.1522	9.19842	18300	5991	NO	37.4438	0	0	0	217.174	1303.04	DE14	B
DE	DE149	DEAG_BW4375100000010	DETP_BW4375100000010	SKA STOV STETTEN	48.1113	9.06572	8500	8112	NO	50.7	0	0	0	294.06	1764.36	DE14	C
DE	DE149	DEAG_BW4375100000011	DETP_BW4375100000011	SKA SIGMARINGEN	48.0771	9.22768	26000	24275	NO	151.719	0	0	0	879.969	5279.81	DE14	A
DE	DE149	DEAG_BW4375100000015	DETP_BW4375100000015	SKA BAD SAULGAU	48.0272	9.4864	32000	19794	NO	123.712	0	0	0	717.532	4305.19	DE14	A
DE	DE149	DEAG_BW4375100000017	DETP_BW4375100000017	SKA PFULLENDORF	47.9332	9.2386	18000	15167	NO	94.7938	0	0	0	549.804	3298.82	DE14	A
DE	DE149	DEAG_BW4375100000021	DETP_BW4375100000021	SKA MESSKIRCH	48.0031	9.16833	17000	12071	NO	75.4438	0	0	0	437.574	2625.44	DE14	C
DE	DE149	DEAG_BW4375100000023	DETP_BW4375100000023	SKA MENGEN	48.0609	9.34283	26700	16121	NO	100.756	0	0	0	584.386	3506.32	DE14	A
DE	DE149	DEAG_BW4375100000027	DETP_BW4375100000027	SKA KRAUCHENWIES	48.0274	9.24528	9500	6051	NO	37.8188	0	0	0	219.349	1316.09	DE14	C
DE	DE149	DEAG_BW4375100000029	DETP_BW4375100000029	SKA HOHENTENGEN	48.0509	9.37992	7000	3098	NO	19.3625	0	0	0	112.302	673.815	DE14	B
DE	DE149	DEAG_BW4375100000034	DETP_BW4375100000034	SKA HERBERTINGEN	48.0678	9.42674	9200	7367	NO	46.0437	0	0	0	267.054	1602.32	DE14	B
DE	DE149	DEAG_BW4375100000038	DETP_BW4375100000038	SKA GAMMERTINGEN	48.2386	9.22366	13800	7273	NO	45.4563	0	0	0	263.646	1581.88	DE14	B
DE	DE149	DEAG_BW4375100000041	DETP_BW4375100000041	SKA OSTRACH	47.9979	9.34015	16400	16732	NO	104.575	0	0	0	606.535	3639.21	DE14	C
DE	DE261	DEAG_BYAB-K0002	DETP_BYAB-K0002	Aschaffenburg	49.9784	9.11064	200000	180600	YES	1128.75	3612	2709	5418	6546.75	39280.5	DE26	A
DE	DE264	DEAG_BYAB-K0008	DETP_BYAB-K0008	Kleinostheim , AV Untermain	50.0253	9.0351	48000	32640	YES	204	652.8	489.6	979.2	1183.2	7099.2	DE26	A
DE	DE264	DEAG_BYAB-K0010	DETP_BYAB-K0010	AZV Main-Mömling-Elsava, KA Heimbuchenthal	49.8792	9.28874	6000	3800	NO	23.75	0	0	0	137.75	826.5	DE26	B
DE	DE264	DEAG_BYAB-K0012	DETP_BYAB-K0012	Zweckverband Abwasserbeseitigung Kahlgrund	50.0934	9.13751	40000	37000	YES	231.25	740	555	1110	1341.25	8047.5	DE26	C
DE	DE264	DEAG_BYAB-K0014	DETP_BYAB-K0014	Alzenau	50.0852	9.05128	25000	30000	NO	187.5	0	0	0	1087.5	6525	DE26	A
DE	DE264	DEAG_BYAB-K0016	DETP_BYAB-K0016	KA Bachgau	49.9228	9.09087	35000	39000	NO	243.75	0	0	0	1413.75	8482.5	DE26	B
DE	DE264	DEAG_BYAB-K0017	DETP_BYAB-K0017	Abwasserverband der Aschafftalgemeinden	50.0015	9.23538	40000	26849	YES	167.806	536.98	402.735	805.47	973.276	5839.66	DE26	A
DE	DE264	DEAG_BYAB-K0018	DETP_BYAB-K0018	KA Kahl	50.0644	8.99333	15000	8000	NO	50	0	0	0	290	1740	DE26	B
DE	DE269	DEAG_BYAB-K0019	DETP_BYAB-K0019	Eichenbühl	49.71	9.31924	8000	3200	NO	20	0	0	0	116	696	DE26	A
DE	DE269	DEAG_BYAB-K0021	DETP_BYAB-K0021	KA AZV Südspessart	49.7723	9.3897	16000	10100	NO	63.125	0	0	0	366.125	2196.75	DE26	A
DE	DE269	DEAG_BYAB-K0022	DETP_BYAB-K0022	Elsenfeld, Gemeinschaftskläranlage Bayer. Untermain Gmbh	49.8584	9.16068	185000	157654	YES	985.338	3153.08	2364.81	4729.62	5714.96	34289.7	DE26	A
DE	DE269	DEAG_BYAB-K0026	DETP_BYAB-K0026	Abwasserzweckverband Main-Mud	49.7114	9.22635	95000	67800	YES	423.75	1356	1017	2034	2457.75	14746.5	DE26	A
DE	DE269	DEAG_BYAB-K0028	DETP_BYAB-K0028	Niedernberg	49.9252	9.13892	7000	6500	NO	40.625	0	0	0	235.625	1413.75	DE26	B
DE	DE263	DEAG_BYAB-K0033	DETP_BYAB-K0033	Würzburg	49.7965	9.89428	360000	206665	YES	1291.66	4133.3	3099.97	6199.95	7491.61	44949.6	DE26	A
DE	DE268	DEAG_BYAB-K0040	DETP_BYAB-K0040	Wiesentheid	49.7945	10.3334	10000	6355	NO	39.7188	0	0	0	230.369	1382.21	DE26	A
DE	DE268	DEAG_BYAB-K0058	DETP_BYAB-K0058	ZV Schwarzacher Becken S.Schwarzach	49.7976	10.2184	18000	15816	NO	98.85	0	0	0	573.33	3439.98	DE26	B
DE	DE268	DEAG_BYAB-K0062	DETP_BYAB-K0062	Kitzingen	49.7085	10.1409	85000	38238	YES	238.987	764.76	573.57	1147.14	1386.13	8316.76	DE26	B
DE	DE268	DEAG_BYAB-K0068	DETP_BYAB-K0068	Geiselwind	49.7655	10.537	9000	3000	NO	18.75	0	0	0	108.75	652.5	DE26	C
DE	DE268	DEAG_BYAB-K0070	DETP_BYAB-K0070	Nordheim/Main	49.8545	10.1752	10000	4820	NO	30.125	0	0	0	174.725	1048.35	DE26	B
DE	DE268	DEAG_BYAB-K0071	DETP_BYAB-K0071	Volkach	49.8619	10.2239	25000	11461	NO	71.6313	0	0	0	415.461	2492.77	DE26	A
DE	DE268	DEAG_BYAB-K0074	DETP_BYAB-K0074	Prichsenstadt	49.8312	10.3262	6000	3128	NO	19.55	0	0	0	113.39	680.34	DE26	B
DE	DE268	DEAG_BYAB-K0077	DETP_BYAB-K0077	Iphofen	49.703	10.2461	9600	2941	NO	18.3813	0	0	0	106.611	639.667	DE26	A
DE	DE26C	DEAG_BYAB-K0082	DETP_BYAB-K0082	Güntersleben	49.8589	9.90666	6500	4593	NO	28.7063	0	0	0	166.496	998.977	DE26	B
DE	DE26C	DEAG_BYAB-K0094	DETP_BYAB-K0094	Aub	49.5493	10.0513	6000	2786	NOT KNOWN	17.4125	0	0	0	100.992	605.955	DE26	A
DE	DE26C	DEAG_BYAB-K0098	DETP_BYAB-K0098	Helmstadt	49.7602	9.65338	5500	2529	NO	15.8063	0	0	0	91.6762	550.058	DE26	C
DE	DE26C	DEAG_BYAB-K0102	DETP_BYAB-K0102	ZV Obere Pleichach Sitz Unterpleichfeld	49.8638	10.0298	16000	14387	NO	89.9188	0	0	0	521.529	3129.17	DE26	B
DE	DE26C	DEAG_BYAB-K0105	DETP_BYAB-K0105	ZV Raum Ochsenfurt Sitz Ochsenfurt	49.7162	10.0018	95000	58494	YES	365.588	1169.88	877.41	1754.82	2120.41	12722.4	DE26	B
DE	DE26C	DEAG_BYAB-K0112	DETP_BYAB-K0112	ZV Uettingen-Roßbrunn Sitz Uettingen	49.7884	9.70741	8500	3729	NO	23.3063	0	0	0	135.176	811.057	DE26	C
DE	DE26C	DEAG_BYAB-K0113	DETP_BYAB-K0113	ZV Ahlbach-Gruppe Sitz Waldbüttelbrunn	49.7786	9.80731	22000	15322	NO	95.7625	0	0	0	555.422	3332.53	DE26	C
DE	DE26C	DEAG_BYAB-K0114	DETP_BYAB-K0114	ZV Maintal-Würzburg S.Veitshöchheim	49.8426	9.86918	26000	13898	NO	86.8625	0	0	0	503.802	3022.81	DE26	A
DE	DE26C	DEAG_BYAB-K0115	DETP_BYAB-K0115	ZV Taubertal	49.517	9.98846	5950	2245	NO	14.0312	0	0	0	81.3812	488.287	DE26	C
DE	DE26A	DEAG_BYAB-K0137	DETP_BYAB-K0137	Marktheidenfeld	49.8331	9.58364	41000	14943	YES	93.3938	298.86	224.145	448.29	541.684	3250.1	DE26	C
DE	DE26A	DEAG_BYAB-K0155	DETP_BYAB-K0155	Triefenstein	49.7873	9.59702	7500	4875	NO	30.4688	0	0	0	176.719	1060.31	DE26	C
DE	DE26A	DEAG_BYAB-K0156	DETP_BYAB-K0156	Lohrtal	50.0319	9.5304	17000	6000	NO	37.5	0	0	0	217.5	1305	DE26	B
DE	DE26A	DEAG_BYAB-K0157	DETP_BYAB-K0157	Karlstadt	49.982	9.76588	19500	8200	NO	51.25	0	0	0	297.25	1783.5	DE26	A
DE	DE26A	DEAG_BYAB-K0159	DETP_BYAB-K0159	KA Aubachtal	50.0249	9.45459	8000	5200	NO	32.5	0	0	0	188.5	1131	DE26	C
DE	DE26A	DEAG_BYAB-K0166	DETP_BYAB-K0166	ZV Zellinger Becken Sitz Zellingen	49.9106	9.80553	28000	16313	NO	101.956	0	0	0	591.346	3548.08	DE26	B
DE	DE26A	DEAG_BYAB-K0169	DETP_BYAB-K0169	Lohr/Main	49.9811	9.58831	40000	19917	YES	124.481	398.34	298.755	597.51	721.991	4331.95	DE26	B
DE	DE26A	DEAG_BYAB-K0170	DETP_BYAB-K0170	Kreuzwertheim	49.7708	9.51092	12000	5000	NO	31.25	0	0	0	181.25	1087.5	DE26	A
DE	DE26A	DEAG_BYAB-K0171	DETP_BYAB-K0171	Arnstein Werntal	49.9629	9.9087	13000	7000	NO	43.75	0	0	0	253.75	1522.5	DE26	C
DE	DE26A	DEAG_BYAB-K0173	DETP_BYAB-K0173	Gemünden Zentralkläranlage	50.0446	9.70084	19000	12920	NO	80.75	0	0	0	468.35	2810.1	DE26	B
DE	DE251	DEAG_BYAN-K0001	DETP_BYAN-K0001	Ansbach	49.2893	10.6046	90000	65415	YES	408.844	1308.3	981.225	1962.45	2371.29	14227.8	DE25	B
DE	DE256	DEAG_BYAN-K0034	DETP_BYAN-K0034	Rothenburg/Tauber	49.396	10.1665	38000	15294	YES	95.5875	305.88	229.41	458.82	554.407	3326.44	DE25	C
DE	DE256	DEAG_BYAN-K0046	DETP_BYAN-K0046	Wassertrüdingen	49.0344	10.6036	22600	15368	NO	96.05	0	0	0	557.09	3342.54	DE25	B
DE	DE256	DEAG_BYAN-K0054	DETP_BYAN-K0054	Heilsbronn	49.3358	10.8179	11000	10527	NO	65.7938	0	0	0	381.604	2289.62	DE25	B
DE	DE256	DEAG_BYAN-K0108	DETP_BYAN-K0108	Windsbach	49.2349	10.8472	12500	17863	NO	111.644	0	0	0	647.534	3885.2	DE25	C
DE	DE256	DEAG_BYAN-K0154	DETP_BYAN-K0154	Leutershausen	49.2903	10.4224	30000	9757	NO	60.9812	0	0	0	353.691	2122.15	DE25	B
DE	DE256	DEAG_BYAN-K0176	DETP_BYAN-K0176	Burgoberbach	49.2274	10.592	5900	4076	NO	25.475	0	0	0	147.755	886.53	DE25	B
DE	DE256	DEAG_BYAN-K0192	DETP_BYAN-K0192	Herrieden	49.2277	10.5044	13000	5920	NO	37	0	0	0	214.6	1287.6	DE25	A
DE	DE256	DEAG_BYAN-K0202	DETP_BYAN-K0202	Neuendettelsau	49.2758	10.7925	17500	9350	NO	58.4375	0	0	0	338.938	2033.62	DE25	B
DE	DE256	DEAG_BYAN-K0204	DETP_BYAN-K0204	Bechhofen	49.1576	10.6171	9900	8356	NO	52.225	0	0	0	302.905	1817.43	DE25	C
DE	DE25A	DEAG_BYAN-K0224	DETP_BYAN-K0224	Emskirchen	49.5533	10.7271	7500	4345	NO	27.1562	0	0	0	157.506	945.037	DE25	B
DE	DE25A	DEAG_BYAN-K0241	DETP_BYAN-K0241	Langenfeld	49.6214	10.5208	9800	14062	NO	87.8875	0	0	0	509.748	3058.48	DE25	B
DE	DE25A	DEAG_BYAN-K0284	DETP_BYAN-K0284	Uffenheim	49.5496	10.2306	16000	6805	NO	42.5312	0	0	0	246.681	1480.09	DE25	A
DE	DE25A	DEAG_BYAN-K0312	DETP_BYAN-K0312	Bad Windsheim	49.5053	10.4385	45000	28405	YES	177.531	568.1	426.075	852.15	1029.68	6178.09	DE25	A
DE	DE25A	DEAG_BYAN-K0314	DETP_BYAN-K0314	Neustadt a.d.Aisch	49.5855	10.6171	32500	23885	NO	149.281	0	0	0	865.831	5194.99	DE25	A
DE	DE25A	DEAG_BYAN-K0321	DETP_BYAN-K0321	Scheinfeld	49.6512	10.4719	8000	4954	NO	30.9625	0	0	0	179.582	1077.49	DE25	C
DE	DE25C	DEAG_BYAN-K0335	DETP_BYAN-K0335	ZV Brombachsee Sitz Pleinfeld	49.1248	10.9979	30000	14319	NO	89.4937	0	0	0	519.064	3114.38	DE25	C
DE	DE25C	DEAG_BYAN-K0348	DETP_BYAN-K0348	Pappenheim	48.9227	10.9668	7200	4680	NO	29.25	0	0	0	169.65	1017.9	DE25	A
DE	DE25C	DEAG_BYAN-K0405	DETP_BYAN-K0405	Gunzenhausen	49.104	10.7578	35000	33790	NO	211.188	0	0	0	1224.89	7349.33	DE25	A
DE	DE25C	DEAG_BYAN-K0416	DETP_BYAN-K0416	Weissenburg/Bay.	49.0341	10.9619	35000	22295	NO	139.344	0	0	0	808.194	4849.16	DE25	A
DE	DE25C	DEAG_BYAN-K0418	DETP_BYAN-K0418	Treuchtlingen	48.9492	10.9113	45000	13706	YES	85.6625	274.12	205.59	411.18	496.842	2981.05	DE25	B
DE	DE256	DEAG_BYAN-K0430	DETP_BYAN-K0430	Dinkelsbühl	49.0586	10.3339	29000	16454	NO	102.837	0	0	0	596.457	3578.74	DE25	A
DE	DE25A	DEAG_BYAN-K0452	DETP_BYAN-K0452	Burgbernheim	49.469	10.3329	8000	6794	NO	42.4625	0	0	0	246.282	1477.69	DE25	C
DE	DE256	DEAG_BYAN-K0468	DETP_BYAN-K0468	Dietenhofen	49.3963	10.7195	12000	7300	NO	45.625	0	0	0	264.625	1587.75	DE25	C
DE	DE256	DEAG_BYAN-K0469	DETP_BYAN-K0469	Feuchtwangen	49.1528	10.3382	19000	16334	NO	102.087	0	0	0	592.107	3552.64	DE25	B
DE	DE25A	DEAG_BYAN-K0470	DETP_BYAN-K0470	Gerhardshofen	49.6349	10.6947	5000	3644	NO	22.775	0	0	0	132.095	792.57	DE25	B
DE	DE256	DEAG_BYAN-K0472	DETP_BYAN-K0472	Lichtenau	49.2774	10.6906	9500	3600	NO	22.5	0	0	0	130.5	783	DE25	A
DE	DE223	DEAG_BYDEG-K0001	DETP_BYDEG-K0001	Straubing	48.9009	12.6248	200000	68664	YES	429.15	1373.28	1029.96	2059.92	2489.07	14934.4	DE22	C
DE	DE224	DEAG_BYDEG-K0008	DETP_BYDEG-K0008	Plattling	48.7764	12.887	48000	16000	YES	100	320	240	480	580	3480	DE22	A
DE	DE224	DEAG_BYDEG-K0012	DETP_BYDEG-K0012	Winzer	48.7152	13.0893	22600	20271	NO	126.694	0	0	0	734.824	4408.94	DE22	A
DE	DE224	DEAG_BYDEG-K0013	DETP_BYDEG-K0013	Metten	48.8464	12.9128	10000	6112	NO	38.2	0	0	0	221.56	1329.36	DE22	A
DE	DE224	DEAG_BYDEG-K0014	DETP_BYDEG-K0014	Moos	48.7587	12.9676	19990	16959	NO	105.994	0	0	0	614.764	3688.58	DE22	B
DE	DE224	DEAG_BYDEG-K0015	DETP_BYDEG-K0015	Schöllnach	48.7481	13.1871	5250	4706	NO	29.4125	0	0	0	170.592	1023.55	DE22	A
DE	DE224	DEAG_BYDEG-K0018	DETP_BYDEG-K0018	ZV Hengersberg Sitz Hengersberg	48.7578	13.0295	28000	19114	NO	119.462	0	0	0	692.882	4157.29	DE22	B
DE	DE224	DEAG_BYDEG-K0030	DETP_BYDEG-K0030	Osterhofen	48.7059	13.0366	14000	8100	NO	50.625	0	0	0	293.625	1761.75	DE22	B
DE	DE224	DEAG_BYDEG-K0035	DETP_BYDEG-K0035	Deggendorf	48.8117	12.9713	46000	39697	YES	248.106	793.94	595.455	1190.91	1439.02	8634.1	DE22	A
DE	DE229	DEAG_BYDEG-K0037	DETP_BYDEG-K0037	Regen	48.9692	13.1051	18000	17055	NO	106.594	0	0	0	618.244	3709.46	DE22	A
DE	DE229	DEAG_BYDEG-K0045	DETP_BYDEG-K0045	Ruhmannsfelden	48.9899	12.9899	9700	4796	NO	29.975	0	0	0	173.855	1043.13	DE22	A
DE	DE229	DEAG_BYDEG-K0047	DETP_BYDEG-K0047	Bodenmais	49.0627	13.0778	27000	13476	NO	84.225	0	0	0	488.505	2931.03	DE22	C
DE	DE229	DEAG_BYDEG-K0050	DETP_BYDEG-K0050	Kirchberg	48.9088	13.1981	6500	3648	NO	22.8	0	0	0	132.24	793.44	DE22	C
DE	DE229	DEAG_BYDEG-K0051	DETP_BYDEG-K0051	ZV Zellertal Sitz Arnbruck	49.0993	13.0037	9500	6515	NO	40.7188	0	0	0	236.169	1417.01	DE22	C
DE	DE229	DEAG_BYDEG-K0062	DETP_BYDEG-K0062	Viechtach	49.0834	12.8888	30000	22358	NO	139.738	0	0	0	810.478	4862.86	DE22	A
DE	DE229	DEAG_BYDEG-K0065	DETP_BYDEG-K0065	Teisnach	49.0427	12.9945	21000	14526	NO	90.7875	0	0	0	526.567	3159.4	DE22	A
DE	DE229	DEAG_BYDEG-K0066	DETP_BYDEG-K0066	Zwiesel	49.007	13.1995	28700	20183	NO	126.144	0	0	0	731.634	4389.8	DE22	C
DE	DE229	DEAG_BYDEG-K0067	DETP_BYDEG-K0067	Bischofsmais-Langbruck	48.9262	13.1154	8500	4583	NO	28.6438	0	0	0	166.134	996.802	DE22	C
DE	DE22B	DEAG_BYDEG-K0074	DETP_BYDEG-K0074	Bogen	48.895	12.7126	15000	11396	NO	71.225	0	0	0	413.105	2478.63	DE22	A
DE	DE22B	DEAG_BYDEG-K0079	DETP_BYDEG-K0079	Mallersdorf-Pfaffenberg	48.7754	12.2695	10000	7951	NO	49.6938	0	0	0	288.224	1729.34	DE22	B
DE	DE22B	DEAG_BYDEG-K0083	DETP_BYDEG-K0083	Niederwinkling	48.8816	12.8032	5166	2981	NO	18.6313	0	0	0	108.061	648.367	DE22	B
DE	DE22B	DEAG_BYDEG-K0086	DETP_BYDEG-K0086	Hunderdorf	48.9371	12.7349	5500	4400	NO	27.5	0	0	0	159.5	957	DE22	B
DE	DE22B	DEAG_BYDEG-K0101	DETP_BYDEG-K0101	Geiselhöring	48.8371	12.4078	12000	9117	NO	56.9812	0	0	0	330.491	1982.95	DE22	C
DE	DE22B	DEAG_BYDEG-K0105	DETP_BYDEG-K0105	Straßkirchen	48.8369	12.7675	11900	9250	NO	57.8125	0	0	0	335.312	2011.88	DE22	B
DE	DE22B	DEAG_BYDEG-K0115	DETP_BYDEG-K0115	Parkstetten	48.9112	12.6329	5500	3340	NO	20.875	0	0	0	121.075	726.45	DE22	C
DE	DE22B	DEAG_BYDEG-K0129	DETP_BYDEG-K0129	Sankt Englmar	48.9945	12.8287	5000	3217	NO	20.1062	0	0	0	116.616	699.697	DE22	B
DE	DE222	DEAG_BYDEG-K0142	DETP_BYDEG-K0142	Passau-Haibach	48.5749	13.4984	110000	88500	YES	553.125	1770	1327.5	2655	3208.12	19248.8	DE22	A
DE	DE228	DEAG_BYDEG-K0149	DETP_BYDEG-K0149	Büchlberg	48.6775	13.5242	5000	4629	NO	28.9313	0	0	0	167.801	1006.81	DE22	B
DE	DE228	DEAG_BYDEG-K0151	DETP_BYDEG-K0151	Wegscheid	48.5928	13.7982	6000	3803	NO	23.7688	0	0	0	137.859	827.152	DE22	B
DE	DE228	DEAG_BYDEG-K0154	DETP_BYDEG-K0154	Hauzenberg-Aubachtal	48.6121	13.6388	6000	3156	NO	19.725	0	0	0	114.405	686.43	DE22	C
DE	DE228	DEAG_BYDEG-K0155	DETP_BYDEG-K0155	Eging am See	48.7224	13.2637	7000	3517	NO	21.9812	0	0	0	127.491	764.947	DE22	B
DE	DE228	DEAG_BYDEG-K0174	DETP_BYDEG-K0174	Thyrnau	48.5856	13.533	6500	10514	NO	65.7125	0	0	0	381.132	2286.79	DE22	C
DE	DE228	DEAG_BYDEG-K0175	DETP_BYDEG-K0175	Aldersbach	48.2991	11.2741	20000	7164	NO	44.775	0	0	0	259.695	1558.17	DE21	C
DE	DE228	DEAG_BYDEG-K0178	DETP_BYDEG-K0178	Ruhstorf an der Rott	48.4494	13.375	14200	14368	NO	89.8	0	0	0	520.84	3125.04	DE22	C
DE	DE228	DEAG_BYDEG-K0183	DETP_BYDEG-K0183	Bad Griesbach im Rottal	48.4133	13.222	27000	11348	NO	70.925	0	0	0	411.365	2468.19	DE22	C
DE	DE228	DEAG_BYDEG-K0189	DETP_BYDEG-K0189	Hutthurm	48.687	13.4505	21000	19175	NO	119.844	0	0	0	695.094	4170.56	DE22	A
DE	DE228	DEAG_BYDEG-K0191	DETP_BYDEG-K0191	Ortenburg-Blindham	48.576	13.2028	11000	7835	NO	48.9688	0	0	0	284.019	1704.11	DE22	B
DE	DE228	DEAG_BYDEG-K0195	DETP_BYDEG-K0195	Vilshofen-Zentrum	48.6275	13.2023	56000	66064	YES	412.9	1321.28	990.96	1981.92	2394.82	14368.9	DE22	A
DE	DE228	DEAG_BYDEG-K0203	DETP_BYDEG-K0203	Pocking	48.419	13.3375	17000	8524	NO	53.275	0	0	0	308.995	1853.97	DE22	B
DE	DE228	DEAG_BYDEG-K0204	DETP_BYDEG-K0204	Bad Füssing	48.3434	13.3414	95000	33946	YES	212.163	678.92	509.19	1018.38	1230.54	7383.26	DE22	C
DE	DE228	DEAG_BYDEG-K0213	DETP_BYDEG-K0213	Hauzenberg-Kaindlmühle	48.6111	13.5828	18000	13333	NO	83.3312	0	0	0	483.321	2899.93	DE22	C
DE	DE228	DEAG_BYDEG-K0214	DETP_BYDEG-K0214	Tiefenbach	48.6197	13.389	8000	4870	NO	30.4375	0	0	0	176.537	1059.22	DE22	B
DE	DE228	DEAG_BYDEG-K0217	DETP_BYDEG-K0217	Tittling	48.7509	13.3946	12000	12700	NO	79.375	0	0	0	460.375	2762.25	DE22	C
DE	DE228	DEAG_BYDEG-K0224	DETP_BYDEG-K0224	Salzweg	48.6056	13.478	6000	4411	NO	27.5687	0	0	0	159.899	959.392	DE22	A
DE	DE228	DEAG_BYDEG-K0226	DETP_BYDEG-K0226	Ruderting	48.6503	13.44	5000	2683	NO	16.7688	0	0	0	97.2588	583.553	DE22	C
DE	DE228	DEAG_BYDEG-K0228	DETP_BYDEG-K0228	Obernzell	48.5621	13.6164	7500	2525	NO	15.7812	0	0	0	91.5312	549.188	DE22	C
DE	DE225	DEAG_BYDEG-K0231	DETP_BYDEG-K0231	Freyung	48.8098	13.5375	17000	11700	NO	73.125	0	0	0	424.125	2544.75	DE22	A
DE	DE225	DEAG_BYDEG-K0236	DETP_BYDEG-K0236	Grafenau	48.8575	13.3859	9900	6160	NO	38.5	0	0	0	223.3	1339.8	DE22	A
DE	DE225	DEAG_BYDEG-K0237	DETP_BYDEG-K0237	Spiegelau	48.9111	13.3588	7500	4550	NO	28.4375	0	0	0	164.938	989.625	DE22	A
DE	DE225	DEAG_BYDEG-K0238	DETP_BYDEG-K0238	Spiegelau OT Augrub	48.8794	13.3347	6500	3106	NO	19.4125	0	0	0	112.593	675.555	DE22	C
DE	DE225	DEAG_BYDEG-K0248	DETP_BYDEG-K0248	Neureichenau	48.7419	13.7509	6000	3833	NO	23.9563	0	0	0	138.946	833.678	DE22	A
DE	DE225	DEAG_BYDEG-K0251	DETP_BYDEG-K0251	ZV Neuschönau-Sankt Oswald	48.8669	13.452	6000	4206	NO	26.2875	0	0	0	152.467	914.805	DE22	B
DE	DE225	DEAG_BYDEG-K0252	DETP_BYDEG-K0252	Röhrnbach	48.7302	13.5244	8000	6363	NO	39.7688	0	0	0	230.659	1383.95	DE22	B
DE	DE225	DEAG_BYDEG-K0262	DETP_BYDEG-K0262	Schönberg	48.8224	13.3527	8800	5035	NOT KNOWN	31.4688	0	0	0	182.519	1095.11	DE22	C
DE	DE225	DEAG_BYDEG-K0292	DETP_BYDEG-K0292	Grafenau OT Furth	48.7888	13.3904	6500	2218	NO	13.8625	0	0	0	80.4025	482.415	DE22	C
DE	DE225	DEAG_BYDEG-K0301	DETP_BYDEG-K0301	Waldkirchen	48.7267	13.5523	16000	10662	NO	66.6375	0	0	0	386.497	2318.98	DE22	C
DE	DE22A	DEAG_BYDEG-K0307	DETP_BYDEG-K0307	Gangkofen	48.4325	12.572	7900	7367	NO	46.0437	0	0	0	267.054	1602.32	DE22	A
DE	DE22A	DEAG_BYDEG-K0311	DETP_BYDEG-K0311	Arnstorf	48.5676	12.8202	20000	6980	NO	43.625	0	0	0	253.025	1518.15	DE22	A
DE	DE22A	DEAG_BYDEG-K0320	DETP_BYDEG-K0320	Tann	48.3093	12.8959	12000	3050	NO	19.0625	0	0	0	110.562	663.375	DE22	A
DE	DE22A	DEAG_BYDEG-K0346	DETP_BYDEG-K0346	Eggenfelden	48.404	12.7779	91930	39450	NO	246.562	0	0	0	1430.06	8580.38	DE22	A
DE	DE22A	DEAG_BYDEG-K0347	DETP_BYDEG-K0347	Simbach am Inn	48.2667	13.0367	19500	16150	NO	100.938	0	0	0	585.438	3512.63	DE22	A
DE	DE22A	DEAG_BYDEG-K0355	DETP_BYDEG-K0355	Massing	48.3931	12.6231	6000	7645	NO	47.7812	0	0	0	277.131	1662.79	DE22	B
DE	DE22A	DEAG_BYDEG-K0364	DETP_BYDEG-K0364	Bad Birnbach	48.4331	13.1005	12500	17468	NO	109.175	0	0	0	633.215	3799.29	DE22	B
DE	DE22A	DEAG_BYDEG-K0366	DETP_BYDEG-K0366	Roßbach	48.6013	12.9395	30000	11626	NO	72.6625	0	0	0	421.442	2528.66	DE22	B
DE	DE22A	DEAG_BYDEG-K0369	DETP_BYDEG-K0369	Pfarrkirchen	48.4314	12.9648	49500	22026	YES	137.662	440.52	330.39	660.78	798.442	4790.65	DE22	B
DE	DE271	DEAG_BYDON-K0001	DETP_BYDON-K0001	Augsburg	48.4126	10.8873	600000	500997	YES	3131.23	10019.9	7514.95	15029.9	18161.1	108967	DE27	A
DE	DE276	DEAG_BYDON-K0003	DETP_BYDON-K0003	Schwabmünchen	48.2017	10.7286	25000	23850	NO	149.062	0	0	0	864.562	5187.38	DE27	C
DE	DE276	DEAG_BYDON-K0006	DETP_BYDON-K0006	Zusmarshausen	48.4246	10.5933	9000	9071	NO	56.6938	0	0	0	328.824	1972.94	DE27	C
DE	DE276	DEAG_BYDON-K0011	DETP_BYDON-K0011	Langweid/Lech	48.5004	10.865	15600	12197	NO	76.2313	0	0	0	442.141	2652.85	DE27	A
DE	DE276	DEAG_BYDON-K0013	DETP_BYDON-K0013	Gersthofen	48.4593	10.8803	31670	38765	NO	242.281	0	0	0	1405.23	8431.39	DE27	C
DE	DE276	DEAG_BYDON-K0014	DETP_BYDON-K0014	Dinkelscherben	48.357	10.5703	12000	10850	NO	67.8125	0	0	0	393.312	2359.88	DE27	B
DE	DE276	DEAG_BYDON-K0016	DETP_BYDON-K0016	Fischach	48.2938	10.6578	14000	11632	NO	72.7	0	0	0	421.66	2529.96	DE27	A
DE	DE276	DEAG_BYDON-K0022	DETP_BYDON-K0022	Gablingen	48.4597	10.8324	12000	7249	NO	45.3062	0	0	0	262.776	1576.66	DE27	B
DE	DE276	DEAG_BYDON-K0023	DETP_BYDON-K0023	Ustersbach	48.3176	10.6354	12000	8558	NO	53.4875	0	0	0	310.228	1861.37	DE27	B
DE	DE276	DEAG_BYDON-K0024	DETP_BYDON-K0024	Thierhaupten	48.5745	10.8988	5000	3051	NO	19.0688	0	0	0	110.599	663.592	DE27	B
DE	DE146	DEAG_BW4265100000002	DETP_BW4265100000002	SKA EROLZHEIM	48.0996	10.0795	10500	13637	NO	85.2313	0	0	0	494.341	2966.05	DE14	B
DE	DE146	DEAG_BW4265100000003	DETP_BW4265100000003	SKA RIEDLINGEN	48.1655	9.49378	60000	44624	YES	278.9	892.48	669.36	1338.72	1617.62	9705.72	DE14	C
DE	DE146	DEAG_BW4265100000004	DETP_BW4265100000004	SKA BALTRINGEN	48.1804	9.86113	6000	8945	NO	55.9062	0	0	0	324.256	1945.54	DE14	B
DE	DE276	DEAG_BYDON-K0025	DETP_BYDON-K0025	Bobingen	48.2869	10.8289	28000	21242	NO	132.763	0	0	0	770.023	4620.13	DE27	C
DE	DE276	DEAG_BYDON-K0029	DETP_BYDON-K0029	Meitingen	48.5806	10.8663	16000	14280	NO	89.25	0	0	0	517.65	3105.9	DE27	C
DE	DE276	DEAG_BYDON-K0031	DETP_BYDON-K0031	Wehringen	48.258	10.7955	9000	5815	NO	36.3438	0	0	0	210.794	1264.76	DE27	B
DE	DE276	DEAG_BYDON-K0035	DETP_BYDON-K0035	Welden	48.4684	10.6537	6000	3530	NO	22.0625	0	0	0	127.962	767.775	DE27	C
DE	DE276	DEAG_BYDON-K0036	DETP_BYDON-K0036	AZV Donnsberggruppe Sitz Allmannshofen	48.6173	10.8165	7500	7087	NO	44.2937	0	0	0	256.904	1541.42	DE27	B
DE	DE276	DEAG_BYDON-K0039	DETP_BYDON-K0039	AZV Lechfeld	48.2189	10.895	48000	32244	YES	201.525	644.88	483.66	967.32	1168.84	7013.07	DE27	A
DE	DE146	DEAG_BW4265100000007	DETP_BW4265100000007	SKA WARTHAUSEN	48.1433	9.79603	99000	88305	YES	551.906	1766.1	1324.58	2649.15	3201.06	19206.3	DE14	C
DE	DE146	DEAG_BW4265100000008	DETP_BW4265100000008	SKA SCHEMMERBERG	48.1999	9.83221	13200	10186	NO	63.6625	0	0	0	369.243	2215.45	DE14	C
DE	DE146	DEAG_BW4265100000009	DETP_BW4265100000009	SKA BAD BUCHAU	48.065	9.58076	15000	11674	NO	72.9625	0	0	0	423.183	2539.09	DE14	C
DE	DE146	DEAG_BW4265100000010	DETP_BW4265100000010	SKA STETTEN	48.2853	9.89677	5200	6993	NO	43.7063	0	0	0	253.496	1520.98	DE14	B
DE	DE146	DEAG_BW4265100000011	DETP_BW4265100000011	SKA BAD SCHUSSENRIED	47.9802	9.65689	16500	13144	NO	82.15	0	0	0	476.47	2858.82	DE14	C
DE	DE146	DEAG_BW4265100000015	DETP_BW4265100000015	SKA EBERHARDZELL	48.0083	9.82719	6000	6496	NO	40.6	0	0	0	235.48	1412.88	DE14	B
DE	DE146	DEAG_BW4265100000023	DETP_BW4265100000023	SKA LAUPHEIM	48.2505	9.87218	50000	30166	YES	188.538	603.32	452.49	904.98	1093.52	6561.11	DE14	B
DE	DE146	DEAG_BW4265100000025	DETP_BW4265100000025	SKA ROT A.D. ROT	48.0343	10.0452	5500	8771	NO	54.8188	0	0	0	317.949	1907.69	DE14	C
DE	DE146	DEAG_BW4265100000030	DETP_BW4265100000030	SKA SCHÖNEBÜRG	48.1651	9.93024	14800	16363	NO	102.269	0	0	0	593.159	3558.95	DE14	C
DE	DE146	DEAG_BW4265100000035	DETP_BW4265100000035	SKA BURGRIEDEN	48.2434	9.92013	14800	15815	NO	98.8438	0	0	0	573.294	3439.76	DE14	B
DE	DE147	DEAG_BW4355100000004	DETP_BW4355100000004	SKA APFLAU	47.6304	9.61354	9375	4885	NO	30.5312	0	0	0	177.081	1062.49	DE14	C
DE	DE147	DEAG_BW4355100000005	DETP_BW4355100000005	SKA FRICKINGEN	47.8049	9.26897	13600	14827	NO	92.6688	0	0	0	537.479	3224.87	DE14	B
DE	DE147	DEAG_BW4355100000006	DETP_BW4355100000006	SKA Grasbeuren	47.7275	9.29987	13800	6198	NO	38.7375	0	0	0	224.678	1348.07	DE14	C
DE	DE147	DEAG_BW4355100000007	DETP_BW4355100000007	SKA UHLDINGEN	47.7308	9.23402	66000	71661	NO	447.881	0	0	0	2597.71	15586.3	DE14	B
DE	DE147	DEAG_BW4355100000008	DETP_BW4355100000008	SKA BUGGENSEGEL	47.7456	9.31368	15000	16745	NO	104.656	0	0	0	607.006	3642.04	DE14	C
DE	DE147	DEAG_BW4355100000009	DETP_BW4355100000009	SKA KRESSBRONN	47.5948	9.58135	24000	23398	NO	146.238	0	0	0	848.178	5089.07	DE14	B
DE	DE147	DEAG_BW4355100000010	DETP_BW4355100000010	SKA Immenstaad	47.6715	9.38871	40000	30403	NO	190.019	0	0	0	1102.11	6612.65	DE14	A
DE	DE147	DEAG_BW4355100000011	DETP_BW4355100000011	SKA ERISKIRCH	47.619	9.53235	50000	53100	YES	331.875	1062	796.5	1593	1924.87	11549.2	DE14	A
DE	DE275	DEAG_BYDON-K0144	DETP_BYDON-K0144	Pöttmes	48.5813	11.1116	12000	6151	NO	38.4438	0	0	0	222.974	1337.84	DE27	B
DE	DE275	DEAG_BYDON-K0146	DETP_BYDON-K0146	AZV Kabisbachgruppe	48.5212	10.9035	18500	20276	NO	126.725	0	0	0	735.005	4410.03	DE27	C
DE	DE275	DEAG_BYDON-K0155	DETP_BYDON-K0155	Dasing	48.3947	11.0587	8550	7103	NO	44.3938	0	0	0	257.484	1544.9	DE27	B
DE	DE275	DEAG_BYDON-K0158	DETP_BYDON-K0158	Affing	48.4623	10.9355	8500	4466	NO	27.9125	0	0	0	161.892	971.355	DE27	B
DE	DE275	DEAG_BYDON-K0162	DETP_BYDON-K0162	Friedberg-Paar	48.3698	11.0403	16800	9270	NO	57.9375	0	0	0	336.037	2016.22	DE27	B
DE	DE277		DETP_BYDON-K0181	ZV Untere Brenz Sitz Bächingen	48.5433	10.3307	9900	7746	NO	48.4125	0	0	0	280.792	1684.75	DE27	C
DE	DE277	DEAG_BYDON-K0185	DETP_BYDON-K0185	Bissingen	48.7096	10.6282	35000	28081	NO	175.506	0	0	0	1017.94	6107.62	DE27	B
DE	DE277	DEAG_BYDON-K0186	DETP_BYDON-K0186	Lauingen	48.5688	10.4508	28500	13408	YES	83.8	268.16	201.12	402.24	486.04	2916.24	DE27	A
DE	DE277	DEAG_BYDON-K0189	DETP_BYDON-K0189	Gundelfingen	48.5511	10.388	25000	12018	NO	75.1125	0	0	0	435.652	2613.91	DE27	B
DE	DE277	DEAG_BYDON-K0190	DETP_BYDON-K0190	Wertingen	48.5706	10.7004	15000	11950	NO	74.6875	0	0	0	433.187	2599.12	DE27	C
DE	DE277	DEAG_BYDON-K0191	DETP_BYDON-K0191	Dillingen / Donau	48.5715	10.5107	45000	28698	YES	179.362	573.96	430.47	860.94	1040.3	6241.81	DE27	A
DE	DE277	DEAG_BYDON-K0192	DETP_BYDON-K0192	Höchstädt / Donau	48.6155	10.5826	8300	5562	NO	34.7625	0	0	0	201.623	1209.74	DE27	B
DE	DE277	DEAG_BYDON-K0193	DETP_BYDON-K0193	Syrgenstein-Vg	48.6264	10.3318	8000	5276	NO	32.975	0	0	0	191.255	1147.53	DE27	C
DE	DE277	DEAG_BYDON-K0196	DETP_BYDON-K0196	Buttenwiesen OT Lauterbach	48.6307	10.743	10000	6044	NO	37.775	0	0	0	219.095	1314.57	DE27	B
DE	DE278	DEAG_BYDON-K0198	DETP_BYDON-K0198	Burgau	48.4403	10.4061	18750	11117	NO	69.4813	0	0	0	402.991	2417.95	DE27	A
DE	DE278	DEAG_BYDON-K0199	DETP_BYDON-K0199	Leipheim	48.4546	10.229	16000	13511	NO	84.4438	0	0	0	489.774	2938.64	DE27	B
DE	DE278	DEAG_BYDON-K0201	DETP_BYDON-K0201	Krumbach	48.2776	10.3555	30000	32167	NO	201.044	0	0	0	1166.05	6996.32	DE27	B
DE	DE278	DEAG_BYDON-K0205	DETP_BYDON-K0205	ZV Mindel-Gruppe Sitz Thannhausen	48.2929	10.4615	35000	14368	NO	89.8	0	0	0	520.84	3125.04	DE27	A
DE	DE278	DEAG_BYDON-K0208	DETP_BYDON-K0208	ZV Burtenbach-Münsterhausen S.Burtenba.	48.346	10.4414	6000	3850	NO	24.0625	0	0	0	139.562	837.375	DE27	B
DE	DE278	DEAG_BYDON-K0209	DETP_BYDON-K0209	Jettingen-Scheppach	48.4102	10.4261	18000	11850	NO	74.0625	0	0	0	429.562	2577.38	DE27	B
DE	DE278	DEAG_BYDON-K0210	DETP_BYDON-K0210	Ziemetshausen	48.2985	10.5414	6350	4668	NO	29.175	0	0	0	169.215	1015.29	DE27	B
DE	DE278	DEAG_BYDON-K0211	DETP_BYDON-K0211	Günzburg	48.4643	10.2886	110000	66574	YES	416.088	1331.48	998.61	1997.22	2413.31	14479.8	DE27	A
DE	DE278	DEAG_BYDON-K0212	DETP_BYDON-K0212	Bibertal	48.4238	10.1852	5000	3657	NO	22.8563	0	0	0	132.566	795.398	DE27	B
DE	DE278	DEAG_BYDON-K0213	DETP_BYDON-K0213	ZV Unteres Günztal Sitz Ichenhausen	48.4162	10.2788	27500	24261	NO	151.631	0	0	0	879.461	5276.77	DE27	B
DE	DE278	DEAG_BYDON-K0215	DETP_BYDON-K0215	ZV Mindel-Kammel Sitz Offingen	48.4894	10.3828	30000	29300	NO	183.125	0	0	0	1062.12	6372.75	DE27	A
DE	DE279		DETP_BYDON-K0216	Vöhringen	48.2874	10.0669	40000	25652	YES	160.325	513.04	384.78	769.56	929.885	5579.31	DE27	A
DE	DE279	DEAG_BYDON-K0218	DETP_BYDON-K0218	ZV Mittleres Rothtal S. Pfaffenhofen	48.3608	10.1575	11000	5421	NO	33.8813	0	0	0	196.511	1179.07	DE27	A
DE	DE279		DETP_BYDON-K0220	Zweckverband Klärwerk Steinhäule	48.4245	10.0313	445000	413317	YES	2583.23	8266.34	6199.76	12399.5	14982.7	89896.4	DE14	A
DE	DE279	DEAG_BYDON-K0222	DETP_BYDON-K0222	Nersingen	48.4362	10.1247	15000	4806	NO	30.0375	0	0	0	174.217	1045.3	DE27	A
DE	DE279		DETP_BYDON-K0227	ZV Mittleres Illertal Sitz Illertissen	48.2505	10.0756	95000	43400	YES	271.25	868	651	1302	1573.25	9439.5	DE27	B
DE	DE279	DEAG_BYDON-K0232	DETP_BYDON-K0232	Elchingen	48.445	10.0938	22000	9533	NO	59.5813	0	0	0	345.571	2073.43	DE27	B
DE	DE244	DEAG_BYHO-K0002	DETP_BYHO-K0002	KA Hof	50.3334	11.9069	290000	284955	YES	1780.97	5699.1	4274.32	8548.65	10329.6	61977.7	DE24	A
DE	DE249	DEAG_BYHO-K0027	DETP_BYHO-K0027	Stammbach	50.1419	11.6801	8000	2416	NO	15.1	0	0	0	87.58	525.48	DE24	A
DE	DE249	DEAG_BYHO-K0052	DETP_BYHO-K0052	AV Selbitztal	50.3499	11.7038	49999	33881	YES	211.756	677.62	508.215	1016.43	1228.19	7369.12	DE24	C
DE	DE242	DEAG_BYHO-K0089	DETP_BYHO-K0089	Bayreuth	49.9575	11.5514	300000	271656	YES	1697.85	5433.12	4074.84	8149.68	9847.53	59085.2	DE24	A
DE	DE246	DEAG_BYHO-K0093	DETP_BYHO-K0093	Bad Berneck im Fichtelgebirge	50.0423	11.6403	13000	5873	NO	36.7063	0	0	0	212.896	1277.38	DE24	B
DE	DE246	DEAG_BYHO-K0102	DETP_BYHO-K0102	Waischenfeld	49.8369	11.3488	7500	7561	NO	47.2563	0	0	0	274.086	1644.52	DE24	C
DE	DE246	DEAG_BYHO-K0104	DETP_BYHO-K0104	Mistelbach	49.9172	11.5225	5000	3867	NO	24.1688	0	0	0	140.179	841.073	DE24	A
DE	DE246	DEAG_BYHO-K0105	DETP_BYHO-K0105	Pegnitz	49.7409	11.5551	16000	15062	YES	94.1375	301.24	225.93	451.86	545.997	3275.98	DE24	B
DE	DE246	DEAG_BYHO-K0106	DETP_BYHO-K0106	Hollfeld	49.9288	11.2931	7000	4599	NO	28.7438	0	0	0	166.714	1000.28	DE24	B
DE	DE246	DEAG_BYHO-K0111	DETP_BYHO-K0111	Pottenstein	49.7755	11.4006	9500	8517	NO	53.2312	0	0	0	308.741	1852.45	DE24	A
DE	DE246	DEAG_BYHO-K0117	DETP_BYHO-K0117	Gefrees	50.0866	11.7227	7000	4272	NO	26.7	0	0	0	154.86	929.16	DE24	B
DE	DE246	DEAG_BYHO-K0126	DETP_BYHO-K0126	Zweckverband zur Abwasserbeseitigung Truppachtal	49.8995	11.3701	6300	6197	NO	38.7313	0	0	0	224.641	1347.85	DE24	C
DE	DE246	DEAG_BYHO-K0133	DETP_BYHO-K0133	Verwaltungsgemeinschaft Betzenstein	49.6508	11.4742	5400	3292	NO	20.575	0	0	0	119.335	716.01	DE24	B
DE	DE24B	DEAG_BYHO-K0150	DETP_BYHO-K0150	Marktleugast	50.1531	11.636	7500	2841	NO	17.7563	0	0	0	102.986	617.918	DE24	A
DE	DE24B	DEAG_BYHO-K0157	DETP_BYHO-K0157	Himmelkron	50.066	11.5859	11000	4748	NO	29.675	0	0	0	172.115	1032.69	DE24	B
DE	DE24B	DEAG_BYHO-K0162	DETP_BYHO-K0162	ZV Abwasserbeseitigung Rotmaintal	50.0118	11.4838	9000	5783	NO	36.1438	0	0	0	209.634	1257.8	DE24	C
DE	DE24B	DEAG_BYHO-K0180	DETP_BYHO-K0180	Kulmbach	50.1009	11.4197	270000	153516	YES	959.475	3070.32	2302.74	4605.48	5564.95	33389.7	DE24	A
DE	DE24D	DEAG_BYHO-K0196	DETP_BYHO-K0196	Arzberg	50.0629	12.2024	24000	29714	NO	185.713	0	0	0	1077.13	6462.79	DE24	B
DE	DE24D	DEAG_BYHO-K0202	DETP_BYHO-K0202	gku Oberes Egertal Röslau	50.089	11.985	16000	7047	NO	44.0437	0	0	0	255.454	1532.72	DE24	B
DE	DE24D	DEAG_BYHO-K0203	DETP_BYHO-K0203	Kirchenlamitz	50.1727	11.9802	5000	3422	NO	21.3875	0	0	0	124.047	744.285	DE24	C
DE	DE24D	DEAG_BYHO-K0204	DETP_BYHO-K0204	Marktleuthen	50.1228	12.036	6000	2184	NO	13.65	0	0	0	79.17	475.02	DE24	C
DE	DE24D	DEAG_BYHO-K0205	DETP_BYHO-K0205	Wunsiedel	50.0397	12.0274	35000	22548	NO	140.925	0	0	0	817.365	4904.19	DE24	B
DE	DE24D	DEAG_BYHO-K0206	DETP_BYHO-K0206	Selb	50.1627	12.1173	65000	44200	YES	276.25	884	663	1326	1602.25	9613.5	DE24	B
DE	DE24D	DEAG_BYHO-K0207	DETP_BYHO-K0207	Marktredwitz	50.0031	12.1101	60000	36088	YES	225.55	721.76	541.32	1082.64	1308.19	7849.14	DE24	A
DE	DE246	DEAG_BYHO-K0208	DETP_BYHO-K0208	Bindlach	50.0091	11.5793	14000	5693	NO	35.5813	0	0	0	206.371	1238.23	DE24	C
DE	DE211	DEAG_BYIN-K0003	DETP_BYIN-K0003	ZV Zentralkläranlage Ingolstadt	48.7612	11.4912	275000	194100	YES	1213.12	3882	2911.5	5823	7036.12	42216.7	DE21	A
DE	DE21J	DEAG_BYIN-K0004	DETP_BYIN-K0004	Pfaffenhofen/Ilm	48.5432	11.5144	54000	49916	YES	311.975	998.32	748.74	1497.48	1809.46	10856.7	DE21	A
DE	DE21J	DEAG_BYIN-K0010	DETP_BYIN-K0010	Vohburg/Donau	48.7707	11.6324	14000	11944	NO	74.65	0	0	0	432.97	2597.82	DE21	B
DE	DE21J	DEAG_BYIN-K0011	DETP_BYIN-K0011	Wolnzach	48.6182	11.6059	15000	7214	NO	45.0875	0	0	0	261.507	1569.04	DE21	B
DE	DE21J	DEAG_BYIN-K0013	DETP_BYIN-K0013	Münchsmünster	48.7752	11.6974	12500	6295	NO	39.3438	0	0	0	228.194	1369.16	DE21	B
DE	DE21J	DEAG_BYIN-K0014	DETP_BYIN-K0014	ZV Mittleres Ilmtal Sitz Rohrbach	48.6401	11.5841	10000	7603	NO	47.5188	0	0	0	275.609	1653.65	DE21	C
DE	DE21J	DEAG_BYIN-K0032	DETP_BYIN-K0032	ZV Oberes Ilmtal Sitz Reichertshausen	48.4731	11.5035	17100	7183	NO	44.8938	0	0	0	260.384	1562.3	DE21	B
DE	DE21J	DEAG_BYIN-K0034	DETP_BYIN-K0034	Geisenfeld	48.6947	11.6196	15000	8867	NO	55.4187	0	0	0	321.429	1928.57	DE21	B
DE	DE21J	DEAG_BYIN-K0035	DETP_BYIN-K0035	Manching	48.723	11.4997	42000	25324	YES	158.275	506.48	379.86	759.72	917.995	5507.97	DE21	A
DE	DE219	DEAG_BYIN-K0050	DETP_BYIN-K0050	Kipfenberg	48.9558	11.3956	7500	6246	NO	39.0375	0	0	0	226.417	1358.5	DE21	B
DE	DE219	DEAG_BYIN-K0054	DETP_BYIN-K0054	Altmannstein	48.9002	11.6582	7500	6583	NO	41.1438	0	0	0	238.634	1431.8	DE21	B
DE	DE219	DEAG_BYIN-K0058	DETP_BYIN-K0058	Eichstätt	48.8796	11.2167	30000	28468	NO	177.925	0	0	0	1031.96	6191.79	DE21	B
DE	DE219	DEAG_BYIN-K0061	DETP_BYIN-K0061	Beilngries	49.0277	11.4789	23000	10551	NO	65.9438	0	0	0	382.474	2294.84	DE21	A
DE	DE219	DEAG_BYIN-K0094	DETP_BYIN-K0094	Pförring	48.8082	11.6977	9800	7844	NO	49.025	0	0	0	284.345	1706.07	DE21	B
DE	DE21I	DEAG_BYIN-K0100	DETP_BYIN-K0100	Schrobenhausen	48.5734	11.2769	55500	42390	YES	264.938	847.8	635.85	1271.7	1536.64	9219.82	DE21	A
DE	DE21I	DEAG_BYIN-K0108	DETP_BYIN-K0108	Neuburg/Donau	48.7379	11.2079	67500	73859	YES	461.619	1477.18	1107.88	2215.77	2677.39	16064.3	DE21	A
DE	DE21I	DEAG_BYIN-K0153	DETP_BYIN-K0153	Karlshuld	48.6954	11.291	10000	12234	NO	76.4625	0	0	0	443.483	2660.89	DE21	B
DE	DE219	DEAG_BYIN-K0159	DETP_BYIN-K0159	Interpark Management Gmbh	48.7843	11.5053	31000	20482	NO	128.013	0	0	0	742.473	4454.84	DE21	A
DE	DE241	DEAG_BYKC-K0001	DETP_BYKC-K0001	Bamberg	49.9122	10.8612	220000	161367	YES	1008.54	3227.34	2420.51	4841.01	5849.55	35097.3	DE24	A
DE	DE245	DEAG_BYKC-K0002	DETP_BYKC-K0002	Memmelsdorf	49.9376	10.9468	14000	10683	NO	66.7687	0	0	0	387.259	2323.55	DE24	B
DE	DE245	DEAG_BYKC-K0003	DETP_BYKC-K0003	Schlüsselfeld	49.7451	10.6427	14000	9247	NO	57.7937	0	0	0	335.204	2011.22	DE24	C
DE	DE245	DEAG_BYKC-K0011	DETP_BYKC-K0011	Scheßlitz	49.9714	11.0208	10000	5138	NO	32.1125	0	0	0	186.252	1117.51	DE24	B
DE	DE245	DEAG_BYKC-K0014	DETP_BYKC-K0014	Baunach	49.9828	10.858	6500	6620	NO	41.375	0	0	0	239.975	1439.85	DE24	B
DE	DE245	DEAG_BYKC-K0016	DETP_BYKC-K0016	AZV BUTTENHEIM-ALTENDORF	49.8033	10.993	13000	11865	NO	74.1562	0	0	0	430.106	2580.64	DE24	B
DE	DE245	DEAG_BYKC-K0017	DETP_BYKC-K0017	Viereth-Trunstadt	49.935	10.7512	6000	6150	NO	38.4375	0	0	0	222.938	1337.62	DE24	B
DE	DE245	DEAG_BYKC-K0018	DETP_BYKC-K0018	Burgebrach	49.8301	10.7568	13000	8840	NO	55.25	0	0	0	320.45	1922.7	DE24	A
DE	DE245	DEAG_BYKC-K0020	DETP_BYKC-K0020	Heiligenstadt in Oberfranken	49.8525	11.1812	6000	2264	NO	14.15	0	0	0	82.07	492.42	DE24	C
DE	DE245	DEAG_BYKC-K0022	DETP_BYKC-K0022	Lisberg	49.8909	10.7316	8000	3163	NO	19.7688	0	0	0	114.659	687.952	DE24	B
DE	DE245	DEAG_BYKC-K0025	DETP_BYKC-K0025	Hirschaid	49.8211	10.9639	16000	17060	NO	106.625	0	0	0	618.425	3710.55	DE24	C
DE	DE245	DEAG_BYKC-K0029	DETP_BYKC-K0029	Stegaurach	49.8524	10.8677	9000	7205	NO	45.0312	0	0	0	261.181	1567.09	DE24	B
DE	DE245	DEAG_BYKC-K0030	DETP_BYKC-K0030	Strullendorf	49.8438	10.9544	15000	9449	NO	59.0563	0	0	0	342.526	2055.16	DE24	A
DE	DE245	DEAG_BYKC-K0031	DETP_BYKC-K0031	Oberhaid	49.9314	10.7903	5000	3486	NO	21.7875	0	0	0	126.367	758.205	DE24	B
DE	DE245	DEAG_BYKC-K0032	DETP_BYKC-K0032	ZV Pommersfelden-Frensdorf-Süd	49.7824	10.849	5500	3071	NO	19.1938	0	0	0	111.324	667.942	DE24	B
DE	DE245	DEAG_BYKC-K0033	DETP_BYKC-K0033	Breitengüßbach	49.9791	10.8853	6850	5270	NO	32.9375	0	0	0	191.037	1146.22	DE24	B
DE	DE245	DEAG_BYKC-K0036	DETP_BYKC-K0036	Zapfendorf	50.0193	10.9251	7300	5200	NO	32.5	0	0	0	188.5	1131	DE24	A
DE	DE248	DEAG_BYKC-K0045	DETP_BYKC-K0045	Gößweinstein	49.7754	11.3374	6000	3900	NO	24.375	0	0	0	141.375	848.25	DE24	B
DE	DE248	DEAG_BYKC-K0047	DETP_BYKC-K0047	ZV_Hirtenbachgruppe	49.6959	11.0449	10000	7994	NO	49.9625	0	0	0	289.783	1738.7	DE24	B
DE	DE248	DEAG_BYKC-K0050	DETP_BYKC-K0050	Ebermannstadt	49.7749	11.1791	25000	22510	NO	140.688	0	0	0	815.987	4895.93	DE24	B
DE	DE248	DEAG_BYKC-K0051	DETP_BYKC-K0051	ZV_Eggolsheim_Hallerndorf	49.7836	11.0161	15000	19495	NO	121.844	0	0	0	706.694	4240.16	DE24	C
DE	DE248	DEAG_BYKC-K0052	DETP_BYKC-K0052	ZV Trubachtal Egloffstein	49.7188	11.25	7400	9565	NO	59.7812	0	0	0	346.731	2080.39	DE24	C
DE	DE248	DEAG_BYKC-K0053	DETP_BYKC-K0053	Forchheim	49.7416	11.0457	90000	69250	YES	432.812	1385	1038.75	2077.5	2510.31	15061.9	DE24	B
DE	DE248	DEAG_BYKC-K0054	DETP_BYKC-K0054	ZV Obere Schwabach	49.5938	11.2015	27500	15709	NO	98.1812	0	0	0	569.451	3416.71	DE24	B
DE	DE24C	DEAG_BYKC-K0056	DETP_BYKC-K0056	Redwitz/Rodach	50.1734	11.1956	15000	10200	NO	63.75	0	0	0	369.75	2218.5	DE24	B
DE	DE24C	DEAG_BYKC-K0058	DETP_BYKC-K0058	Weismain	50.1056	11.2409	20000	13600	NO	85	0	0	0	493	2958	DE24	C
DE	DE24C	DEAG_BYKC-K0061	DETP_BYKC-K0061	Ebensfeld	50.0591	10.9476	9950	6468	NO	40.425	0	0	0	234.465	1406.79	DE24	B
DE	DE24C	DEAG_BYKC-K0063	DETP_BYKC-K0063	AZV Kunstadt	50.1426	11.2326	20000	13600	NO	85	0	0	0	493	2958	DE24	A
DE	DE24C	DEAG_BYKC-K0064	DETP_BYKC-K0064	ZV Marktzeuln-Michelau Sitz Michelau	50.1569	11.1029	14717	10008	NO	62.55	0	0	0	362.79	2176.74	DE24	B
DE	DE24C	DEAG_BYKC-K0074	DETP_BYKC-K0074	Bad Staffelstein	50.0988	10.9726	26000	17680	NO	110.5	0	0	0	640.9	3845.4	DE24	C
DE	DE24C	DEAG_BYKC-K0075	DETP_BYKC-K0075	Lichtenfels	50.1419	11.0494	40000	27200	YES	170	544	408	816	986	5916	DE24	A
DE	DE243	DEAG_BYKC-K0083	DETP_BYKC-K0083	Coburg	50.2408	10.9695	150000	108000	YES	675	2160	1620	3240	3915	23490	DE24	A
DE	DE247	DEAG_BYKC-K0086	DETP_BYKC-K0086	Weitramsdorf	50.2189	10.8413	8000	5200	NO	32.5	0	0	0	188.5	1131	DE24	C
DE	DE247	DEAG_BYKC-K0087	DETP_BYKC-K0087	Ebersdorf	50.2112	11.0922	9500	6175	NO	38.5938	0	0	0	223.844	1343.06	DE24	B
DE	DE247	DEAG_BYKC-K0093	DETP_BYKC-K0093	Sonnefeld	50.2148	11.1415	7000	4550	NO	28.4375	0	0	0	164.938	989.625	DE24	A
DE	DE247	DEAG_BYKC-K0094	DETP_BYKC-K0094	Meeder	50.2971	10.9278	5000	3450	NO	21.5625	0	0	0	125.062	750.375	DE24	C
DE	DE247	DEAG_BYKC-K0098	DETP_BYKC-K0098	Weidhausen	50.2012	11.1259	6000	3900	NO	24.375	0	0	0	141.375	848.25	DE24	A
DE	DE247	DEAG_BYKC-K0099	DETP_BYKC-K0099	Itzgrund	50.1155	10.8682	11000	7480	NO	46.75	0	0	0	271.15	1626.9	DE24	C
DE	DE247	DEAG_BYKC-K0100	DETP_BYKC-K0100	Mittlerer Itzgrund	50.2112	10.9813	20000	13600	NO	85	0	0	0	493	2958	DE24	B
DE	DE247	DEAG_BYKC-K0101	DETP_BYKC-K0101	Neustadt/Cbg.	50.3201	11.1105	30000	20400	NO	127.5	0	0	0	739.5	4437	DE24	A
DE	DE247	DEAG_BYKC-K0102	DETP_BYKC-K0102	Rödental	50.2817	11.0168	35000	23800	NO	148.75	0	0	0	862.75	5176.5	DE24	B
DE	DE247	DEAG_BYKC-K0103	DETP_BYKC-K0103	Bad Rodach	50.3313	10.7922	12000	8160	NO	51	0	0	0	295.8	1774.8	DE24	B
DE	DE24A	DEAG_BYKC-K0104	DETP_BYKC-K0104	Kronach	50.2245	11.3166	28000	21502	NO	134.388	0	0	0	779.447	4676.68	DE24	A
DE	DE24A	DEAG_BYKC-K0105	DETP_BYKC-K0105	Ludwigsstadt	50.4917	11.3784	14000	6667	NO	41.6688	0	0	0	241.679	1450.07	DE24	A
DE	DE24A	DEAG_BYKC-K0107	DETP_BYKC-K0107	Wallenfels	50.2769	11.4393	8750	2317	NO	14.4813	0	0	0	83.9912	503.947	DE24	C
DE	DE24A	DEAG_BYKC-K0111	DETP_BYKC-K0111	Kronach-Nord	50.2648	11.3044	10000	7827	NO	48.9187	0	0	0	283.729	1702.37	DE24	A
DE	DE24A	DEAG_BYKC-K0116	DETP_BYKC-K0116	Steinwiesen	50.2881	11.4454	9000	2934	NO	18.3375	0	0	0	106.358	638.145	DE24	C
DE	DE24A	DEAG_BYKC-K0118	DETP_BYKC-K0118	Ölsnitz-Rodachtal	50.3553	11.5129	6000	5637	NO	35.2313	0	0	0	204.341	1226.05	DE24	C
DE	DE24A	DEAG_BYKC-K0120	DETP_BYKC-K0120	Steinachtal	50.2359	11.1987	13000	9150	NO	57.1875	0	0	0	331.687	1990.12	DE24	C
DE	DE24A	DEAG_BYKC-K0121	DETP_BYKC-K0121	Kronach-Süd	50.1866	11.2511	25000	20713	NO	129.456	0	0	0	750.846	4505.08	DE24	B
DE	DE24A	DEAG_BYKC-K0126	DETP_BYKC-K0126	Pressig	50.3394	11.2983	9750	2599	NO	16.2438	0	0	0	94.2138	565.283	DE24	B
DE	DE24A	DEAG_BYKC-K0130	DETP_BYKC-K0130	Marktrodach	50.2366	11.38	6000	2773	NO	17.3313	0	0	0	100.521	603.127	DE24	C
DE	DE272	DEAG_BYKE-K0001	DETP_BYKE-K0001	Kaufbeuren	47.9025	10.6151	80000	58748	YES	367.175	1174.96	881.22	1762.44	2129.61	12777.7	DE27	A
DE	DE27E	DEAG_BYKE-K0016	DETP_BYKE-K0016	ZV Obere Iller Sitz Sonthofen	47.5994	10.2652	150000	136131	YES	850.819	2722.62	2041.96	4083.93	4934.75	29608.5	DE27	C
DE	DE27E	DEAG_BYKE-K0017	DETP_BYKE-K0017	Oberstaufen	47.5337	9.98775	18750	13293	NO	83.0812	0	0	0	481.871	2891.23	DE27	C
DE	DE27E	DEAG_BYKE-K0018	DETP_BYKE-K0018	Oy- Mittelberg	47.6458	10.4667	5500	2886	NO	18.0375	0	0	0	104.618	627.705	DE27	B
DE	DE27E	DEAG_BYKE-K0020	DETP_BYKE-K0020	Kempten AZV	47.7793	10.2868	350000	450300	YES	2814.38	9006	6754.5	13509	16323.4	97940.2	DE27	C
DE	DE27E	DEAG_BYKE-K0028	DETP_BYKE-K0028	Wertach	47.606	10.4272	7500	3831	NO	23.9437	0	0	0	138.874	833.242	DE27	C
DE	DE27B	DEAG_BYKE-K0032	DETP_BYKE-K0032	Marktoberdorf	47.7963	10.619	46300	48831	YES	305.194	976.62	732.465	1464.93	1770.12	10620.7	DE27	A
DE	DE27B	DEAG_BYKE-K0041	DETP_BYKE-K0041	Buchloe	48.0445	10.7209	30000	32786	NO	204.913	0	0	0	1188.49	7130.96	DE27	A
DE	DE27B	DEAG_BYKE-K0043	DETP_BYKE-K0043	Nesselwang	47.6321	10.501	7000	3920	NO	24.5	0	0	0	142.1	852.6	DE27	B
DE	DE27B	DEAG_BYKE-K0044	DETP_BYKE-K0044	ZV Füssen Sitz Füssen	47.5983	10.7118	70000	34520	YES	215.75	690.4	517.8	1035.6	1251.35	7508.1	DE27	C
DE	DE27B	DEAG_BYKE-K0055	DETP_BYKE-K0055	Obergünzburg	47.8536	10.4155	15000	11867	NO	74.1688	0	0	0	430.179	2581.07	DE27	B
DE	DE27B	DEAG_BYKE-K0062	DETP_BYKE-K0062	ZV Gennach-Kirchweihtal S. Westendorf	47.9583	10.7287	8000	6734	NO	42.0875	0	0	0	244.107	1464.64	DE27	C
DE	DE27B	DEAG_BYKE-K0063	DETP_BYKE-K0063	Halblech	47.6462	10.8003	7500	3119	NO	19.4938	0	0	0	113.064	678.383	DE27	C
DE	DE27B	DEAG_BYKE-K0064	DETP_BYKE-K0064	ZV Aitrang-Ruderatshofen Sitz Ruderatsh.	47.8254	10.5929	6000	5124	NO	32.025	0	0	0	185.745	1114.47	DE27	C
DE	DE27B	DEAG_BYKE-K0065	DETP_BYKE-K0065	ZV Wertach Ost Sitz Germaringen	47.944	10.6281	13600	9203	NO	57.5188	0	0	0	333.609	2001.65	DE27	C
DE	DE27A	DEAG_BYKE-K0074	DETP_BYKE-K0074	Abwasserverband Obere Leiblach	47.6413	9.82623	34375	26012	NO	162.575	0	0	0	942.935	5657.61	DE27	A
DE	DE27A		DETP_BYKE-K0079	Lindau/Bodensee	47.5459	9.73295	60000	60000	YES	375	1200	900	1800	2175	13050	DE27	A
DE	DE27A	DEAG_BYKE-K0081	DETP_BYKE-K0081	ZV Rothach S.Lindenberg	47.5742	9.90398	77500	34500	YES	215.625	690	517.5	1035	1250.62	7503.75	DE27	A
DE	DE27A	DEAG_BYKE-K0087	DETP_BYKE-K0087	Grünenbach	47.6195	9.98751	11250	8576	NO	53.6	0	0	0	310.88	1865.28	DE27	C
DE	DE27B	DEAG_BYKE-K0094	DETP_BYKE-K0094	Ronsberg	47.9079	10.4052	6000	4851	NO	30.3187	0	0	0	175.849	1055.09	DE27	C
DE	DE274	DEAG_BYKE-K0112	DETP_BYKE-K0112	Memmingen	48.0529	10.1439	230000	118801	YES	742.506	2376.02	1782.02	3564.03	4306.54	25839.2	DE27	C
DE	DE27C	DEAG_BYKE-K0115	DETP_BYKE-K0115	Kammlach OT Unterkammlach	48.0651	10.4185	9950	7941	NO	49.6313	0	0	0	287.861	1727.17	DE27	B
DE	DE27C	DEAG_BYKE-K0116	DETP_BYKE-K0116	Mindelheim	48.0647	10.4843	47000	26015	YES	162.594	520.3	390.225	780.45	943.044	5658.26	DE27	C
DE	DE27C	DEAG_BYKE-K0120	DETP_BYKE-K0120	Babenhausen	48.1549	10.2395	9500	4700	NO	29.375	0	0	0	170.375	1022.25	DE27	B
DE	DE27C	DEAG_BYKE-K0123	DETP_BYKE-K0123	Oberschönegg	48.1073	10.2905	44000	34570	NO	216.062	0	0	0	1253.16	7518.97	DE27	C
DE	DE27C	DEAG_BYKE-K0124	DETP_BYKE-K0124	Kirchheim/Schwaben	48.1864	10.4649	7000	2866	NO	17.9125	0	0	0	103.893	623.355	DE27	B
DE	DE27C	DEAG_BYKE-K0130	DETP_BYKE-K0130	VG Ottobeuren-Hawangen	47.9763	10.2862	20000	19591	NO	122.444	0	0	0	710.174	4261.04	DE27	C
DE	DE27C	DEAG_BYKE-K0131	DETP_BYKE-K0131	Türkheim-Vg	48.0795	10.6558	18000	11334	NO	70.8375	0	0	0	410.857	2465.14	DE27	C
DE	DE27C	DEAG_BYKE-K0132	DETP_BYKE-K0132	Illerwinkel-Vg	47.9092	10.1173	7200	6600	NO	41.25	0	0	0	239.25	1435.5	DE27	B
DE	DE27C	DEAG_BYKE-K0134	DETP_BYKE-K0134	Ettringen	48.1178	10.6648	6000	4344	NO	27.15	0	0	0	157.47	944.82	DE27	A
DE	DE27C	DEAG_BYKE-K0138	DETP_BYKE-K0138	ZV Oberes Günztal	48.0818	10.2982	25000	14950	NO	93.4375	0	0	0	541.938	3251.62	DE27	C
DE	DE27C	DEAG_BYKE-K0139	DETP_BYKE-K0139	Bad Wörishofen	48.041	10.5971	43000	34100	YES	213.125	682	511.5	1023	1236.12	7416.75	DE27	C
DE	DE27B	DEAG_BYKE-K0151	DETP_BYKE-K0151	AV Lechbruck-Bernbeuren	47.718	10.827	11000	6742	NO	42.1375	0	0	0	244.398	1466.38	DE27	C
DE	DE262	DEAG_BYKG-K0001	DETP_BYKG-K0001	KA Schweinfurt	50.0249	10.211	250000	168787	YES	1054.92	3375.74	2531.8	5063.61	6118.53	36711.2	DE26	A
DE	DE265	DEAG_BYKG-K0003	DETP_BYKG-K0003	ZV Aschach-Saale Sitz Burkardroth	50.2414	10.065	19500	14617	NO	91.3563	0	0	0	529.866	3179.2	DE26	B
DE	DE265	DEAG_BYKG-K0009	DETP_BYKG-K0009	Bad Kissingen	50.1809	10.0739	60000	37850	YES	236.562	757	567.75	1135.5	1372.06	8232.37	DE26	A
DE	DE265	DEAG_BYKG-K0011	DETP_BYKG-K0011	Münnerstadt	50.2598	10.1857	9500	6240	NO	39	0	0	0	226.2	1357.2	DE26	C
DE	DE265	DEAG_BYKG-K0021	DETP_BYKG-K0021	Wildflecken	50.3694	9.89741	9900	4133	NO	25.8313	0	0	0	149.821	898.927	DE26	C
DE	DE265	DEAG_BYKG-K0033	DETP_BYKG-K0033	ZV Obere Lauer Sitz Maßbach	50.2311	10.2435	17000	12755	NO	79.7188	0	0	0	462.369	2774.21	DE26	C
DE	DE265	DEAG_BYKG-K0034	DETP_BYKG-K0034	ZV Thulba-Saale Sitz Hammelburg	50.1183	9.87691	28000	21754	NO	135.963	0	0	0	788.582	4731.49	DE26	A
DE	DE265	DEAG_BYKG-K0035	DETP_BYKG-K0035	Bad Brückenau	50.2677	9.70502	20000	10767	NO	67.2938	0	0	0	390.304	2341.82	DE26	A
DE	DE266	DEAG_BYKG-K0039	DETP_BYKG-K0039	Saal a.d. Saale	50.3313	10.3246	7000	4550	NO	28.4375	0	0	0	164.938	989.625	DE26	B
DE	DE266	DEAG_BYKG-K0068	DETP_BYKG-K0068	Bischofsheim/Rhön	50.4006	10.0503	9900	7725	NO	48.2812	0	0	0	280.031	1680.19	DE26	C
DE	DE266	DEAG_BYKG-K0077	DETP_BYKG-K0077	ZV Saale-Lauer Sitz Hohenroth	50.3038	10.1741	40000	34905	YES	218.156	698.1	523.575	1047.15	1265.31	7591.84	DE26	C
DE	DE266	DEAG_BYKG-K0078	DETP_BYKG-K0078	ZV Elstal	50.3807	10.2284	10000	6147	NO	38.4188	0	0	0	222.829	1336.97	DE26	C
DE	DE266	DEAG_BYKG-K0080	DETP_BYKG-K0080	Bad Königshofen	50.2951	10.4479	15000	9398	NO	58.7375	0	0	0	340.677	2044.06	DE26	B
DE	DE266	DEAG_BYKG-K0081	DETP_BYKG-K0081	ZV Mellrichstädter Gruppe S. Mellrichstadt	50.4198	10.2985	24000	11498	NO	71.8625	0	0	0	416.802	2500.81	DE26	A
DE	DE266	DEAG_BYKG-K0083	DETP_BYKG-K0083	ZV Obere Streu Sitz Fladungen	50.4694	10.1914	9000	7244	NO	45.275	0	0	0	262.595	1575.57	DE26	C
DE	DE26B	DEAG_BYKG-K0085	DETP_BYKG-K0085	Bergrheinfeld	49.9895	10.171	17000	13836	NO	86.475	0	0	0	501.555	3009.33	DE26	C
DE	DE26B	DEAG_BYKG-K0099	DETP_BYKG-K0099	Werneck	49.9645	10.061	18000	12403	NO	77.5187	0	0	0	449.609	2697.65	DE26	C
DE	DE26B	DEAG_BYKG-K0100	DETP_BYKG-K0100	Gerolzhofen	49.9097	10.3379	14000	12397	NO	77.4813	0	0	0	449.391	2696.35	DE26	B
DE	DE26B	DEAG_BYKG-K0123	DETP_BYKG-K0123	ZV Unterer Unkenbach Sitz Schwebheim	49.9632	10.1963	13000	8302	NO	51.8875	0	0	0	300.947	1805.68	DE26	B
DE	DE26B	DEAG_BYKG-K0124	DETP_BYKG-K0124	ZV Obere Werntalgemeinden S. Poppenhausen	50.0397	10.1752	50000	19316	YES	120.725	386.32	289.74	579.48	700.205	4201.23	DE26	B
DE	DE267	DEAG_BYKG-K0130	DETP_BYKG-K0130	ZV Raum Theres Sitz Gädheim	50.0196	10.3522	6700	5400	NO	33.75	0	0	0	195.75	1174.5	DE26	B
DE	DE267	DEAG_BYKG-K0176	DETP_BYKG-K0176	ZV Raum Eltmann- Ebelsbach S. Eltmann	49.9881	10.6498	25000	8868	NO	55.425	0	0	0	321.465	1928.79	DE26	B
DE	DE267	DEAG_BYKG-K0181	DETP_BYKG-K0181	Hofheim/Ufr.	50.1352	10.5305	15000	10074	NO	62.9625	0	0	0	365.183	2191.1	DE26	B
DE	DE267	DEAG_BYKG-K0182	DETP_BYKG-K0182	Ebern	50.079	10.8005	18000	8849	NO	55.3063	0	0	0	320.776	1924.66	DE26	C
DE	DE267	DEAG_BYKG-K0183	DETP_BYKG-K0183	Knetzgau	50.0061	10.5305	19000	14422	NO	90.1375	0	0	0	522.798	3136.79	DE26	C
DE	DE267	DEAG_BYKG-K0184	DETP_BYKG-K0184	Haßfurt	50.0313	10.4931	27500	26321	NO	164.506	0	0	0	954.136	5724.82	DE26	A
DE	DE267	DEAG_BYKG-K0185	DETP_BYKG-K0185	Zeil/Sand a. Main	50.0043	10.5935	19500	16433	NO	102.706	0	0	0	595.696	3574.18	DE26	A
DE	DE266	DEAG_BYKG-K0192	DETP_BYKG-K0192	ZV Streu-Saale Sitz Heustreu	50.3445	10.2624	7300	5797	NO	36.2313	0	0	0	210.141	1260.85	DE26	C
DE	DE265	DEAG_BYKG-K0196	DETP_BYKG-K0196	Nüdlingen	50.2238	10.1021	6850	3834	NO	23.9625	0	0	0	138.983	833.895	DE26	C
DE	DE26B	DEAG_BYKG-K10100	DETP_BYKG-K10100	ZV Kolitzheim-Sulzheim	49.9068	10.2704	7200	6214	NO	38.8375	0	0	0	225.257	1351.54	DE26	C
DE	DE276	DEAG_BYDON-K0041	DETP_BYDON-K0041	Altenmünster	48.4909	10.6118	8500	4047	NO	25.2938	0	0	0	146.704	880.223	DE27	B
DE	DE276	DEAG_BYDON-K0042	DETP_BYDON-K0042	AZV Schmuttertal Sitz Hirblingen	48.4391	10.8253	50000	52300	YES	326.875	1046	784.5	1569	1895.87	11375.2	DE27	C
DE	DE27D	DEAG_BYDON-K0048	DETP_BYDON-K0048	Oettingen/Bay	48.9418	10.6075	9400	11700	NO	73.125	0	0	0	424.125	2544.75	DE27	A
DE	DE27D	DEAG_BYDON-K0062	DETP_BYDON-K0062	Donauwörth	48.7109	10.7959	64000	32917	YES	205.731	658.34	493.755	987.51	1193.24	7159.45	DE27	A
DE	DE27D	DEAG_BYDON-K0070	DETP_BYDON-K0070	Rain/Lech	48.699	10.9231	21000	13427	NO	83.9188	0	0	0	486.729	2920.37	DE27	B
DE	DE27D	DEAG_BYDON-K0079	DETP_BYDON-K0079	Tapfheim OT Erlingshofen	48.6814	10.7154	6000	4966	NO	31.0375	0	0	0	180.017	1080.1	DE27	B
DE	DE27D	DEAG_BYDON-K0082	DETP_BYDON-K0082	Harburg/Schwaben	48.7748	10.7072	7500	5835	NO	36.4688	0	0	0	211.519	1269.11	DE27	B
DE	DE27D	DEAG_BYDON-K0084	DETP_BYDON-K0084	Kaisheim	48.7598	10.7874	6000	3900	NO	24.375	0	0	0	141.375	848.25	DE27	C
DE	DE27D	DEAG_BYDON-K0087	DETP_BYDON-K0087	Monheim	48.8392	10.8692	9700	5213	NO	32.5813	0	0	0	188.971	1133.83	DE27	B
DE	DE27D	DEAG_BYDON-K0093	DETP_BYDON-K0093	Nördlingen	48.8735	10.5124	70000	32894	YES	205.588	657.88	493.41	986.82	1192.41	7154.44	DE27	A
DE	DE275	DEAG_BYDON-K0139	DETP_BYDON-K0139	Baar (Schwaben)	48.6001	10.9525	9000	5850	NO	36.5625	0	0	0	212.062	1272.37	DE27	C
DE	DE227	DEAG_BYLA-K0075	DETP_BYLA-K0075	Rottenburg/Laaber	48.7135	12.0148	25000	17744	NO	110.9	0	0	0	643.22	3859.32	DE22	A
DE	DE227	DEAG_BYLA-K0076	DETP_BYLA-K0076	Bruckberg	48.5066	12.0155	6350	4776	NO	29.85	0	0	0	173.13	1038.78	DE22	B
DE	DE227	DEAG_BYLA-K0091	DETP_BYLA-K0091	Buch am Erlbach	48.4628	12.0114	5000	2621	NOT KNOWN	16.3813	0	0	0	95.0113	570.067	DE22	B
DE	DE227	DEAG_BYLA-K0092	DETP_BYLA-K0092	Essenbach	48.6099	12.2921	15000	9011	NO	56.3188	0	0	0	326.649	1959.89	DE22	A
DE	DE227	DEAG_BYLA-K0098	DETP_BYLA-K0098	ZV AW Niederaichbach-Wörth S. Niederaichb.	48.6179	12.3506	12000	13117	NO	81.9813	0	0	0	475.491	2852.95	DE22	B
DE	DE227	DEAG_BYLA-K0101	DETP_BYLA-K0101	Vilsbiburg	48.464	12.3759	16716	14982	NO	93.6375	0	0	0	543.097	3258.58	DE22	C
DE	DE22C	DEAG_BYLA-K0106	DETP_BYLA-K0106	Landau/Isar	48.6777	12.7057	40000	27107	YES	169.419	542.14	406.605	813.21	982.629	5895.77	DE22	B
DE	DE22C	DEAG_BYLA-K0109	DETP_BYLA-K0109	Mamming	48.6568	12.6129	6660	3878	NO	24.2375	0	0	0	140.577	843.465	DE22	A
DE	DE22C	DEAG_BYLA-K0113	DETP_BYLA-K0113	Moosthenning	48.6666	12.4931	6000	5146	NO	32.1625	0	0	0	186.543	1119.26	DE22	C
DE	DE22C	DEAG_BYLA-K0115	DETP_BYLA-K0115	Simbach	48.5699	12.7439	6000	3137	NO	19.6062	0	0	0	113.716	682.297	DE22	A
DE	DE22C	DEAG_BYLA-K0119	DETP_BYLA-K0119	Eichendorf	48.6358	12.8663	8000	5605	NO	35.0312	0	0	0	203.181	1219.09	DE22	B
DE	DE22C	DEAG_BYLA-K0120	DETP_BYLA-K0120	Mengkofen-Hüttenkofen	48.7485	12.4727	12000	4414	NO	27.5875	0	0	0	160.007	960.045	DE22	C
DE	DE22C	DEAG_BYLA-K0121	DETP_BYLA-K0121	Wallersdorf	48.7381	12.7569	7000	5242	NO	32.7625	0	0	0	190.023	1140.13	DE22	A
DE	DE22C	DEAG_BYLA-K0122	DETP_BYLA-K0122	AZV Mittlere Vils	48.5793	12.6268	25000	17330	NO	108.312	0	0	0	628.212	3769.27	DE22	B
DE	DE22C	DEAG_BYLA-K0123	DETP_BYLA-K0123	Dingolfing	48.6372	12.5182	70000	73042	YES	456.513	1460.84	1095.63	2191.26	2647.77	15886.6	DE22	B
DE	DE21B	DEAG_BYM-K0001	DETP_BYM-K0001	München II - Gut Marienhof	48.292	11.6886	1000000	741000	YES	4631.25	14820	11115	22230	26861.2	161168	DE21	B
DE	DE212	DEAG_BYM-K0002	DETP_BYM-K0002	München I	48.2088	11.6294	1950000	980539	YES	6128.37	19610.8	14708.1	29416.2	35544.5	213267	DE21	A
DE	DE21H	DEAG_BYM-K0018	DETP_BYM-K0018	Oberschleißheim	48.2606	11.5417	30000	15016	NO	93.85	0	0	0	544.33	3265.98	DE21	B
DE	DE21H	DEAG_BYM-K0019	DETP_BYM-K0019	Ismaning	48.2369	11.673	38000	26066	NO	162.912	0	0	0	944.892	5669.35	DE21	A
DE	DE21H	DEAG_BYM-K0023	DETP_BYM-K0023	Unterföhring	48.2001	11.6617	20000	19584	NO	122.4	0	0	0	709.92	4259.52	DE21	A
DE	DE21H	DEAG_BYM-K0024	DETP_BYM-K0024	Schäftlarn	47.9813	11.47	6960	5822	NO	36.3875	0	0	0	211.047	1266.28	DE21	C
DE	DE21H	DEAG_BYM-K0025	DETP_BYM-K0025	Garching bei München	48.269	11.6823	45000	33505	NO	209.406	0	0	0	1214.56	7287.34	DE21	A
DE	DE217	DEAG_BYM-K0031	DETP_BYM-K0031	Dachau	48.2805	11.4694	95000	55411	YES	346.319	1108.22	831.165	1662.33	2008.65	12051.9	DE21	B
DE	DE217	DEAG_BYM-K00336	DETP_BYM-K00336	Sulzemoos	48.2991	11.2741	6000	2020	NOT KNOWN	12.625	0	0	0	73.225	439.35	DE21	C
DE	DE217	DEAG_BYM-K0040	DETP_BYM-K0040	Altomünster	48.3588	11.2665	14000	13509	NO	84.4313	0	0	0	489.701	2938.21	DE21	C
DE	DE217	DEAG_BYM-K0048	DETP_BYM-K0048	Erdweg	48.3357	11.3046	8000	6564	NO	41.025	0	0	0	237.945	1427.67	DE21	B
DE	DE217	DEAG_BYM-K0049	DETP_BYM-K0049	Odelzhausen	48.3188	11.2195	12000	8856	NO	55.35	0	0	0	321.03	1926.18	DE21	C
DE	DE217	DEAG_BYM-K0050	DETP_BYM-K0050	Haimhausen	48.3192	11.5491	8800	5661	NO	35.3813	0	0	0	205.211	1231.27	DE21	A
DE	DE217	DEAG_BYM-K0052	DETP_BYM-K0052	Petershausen	48.4094	11.4799	9500	6727	NO	42.0438	0	0	0	243.854	1463.12	DE21	B
DE	DE217	DEAG_BYM-K0065	DETP_BYM-K0065	Markt Indersdorf	48.3633	11.3834	18000	11947	NO	74.6688	0	0	0	433.079	2598.47	DE21	B
DE	DE217	DEAG_BYM-K0067	DETP_BYM-K0067	Hebertshausen	48.303	11.4998	10000	6259	NO	39.1187	0	0	0	226.889	1361.33	DE21	B
DE	DE217	DEAG_BYM-K0068	DETP_BYM-K0068	Vierkirchen	48.3828	11.4538	7500	4693	NO	29.3313	0	0	0	170.121	1020.73	DE21	C
DE	DE217	DEAG_BYM-K0069	DETP_BYM-K0069	Karlsfeld	48.2476	11.4802	45000	34367	YES	214.794	687.34	515.505	1031.01	1245.8	7474.82	DE21	C
DE	DE21A	DEAG_BYM-K0070	DETP_BYM-K0070	Dorfen	48.2745	12.1631	15000	19413	NO	121.331	0	0	0	703.721	4222.33	DE21	B
DE	DE21A	DEAG_BYM-K0073	DETP_BYM-K0073	Isen	48.2206	12.0514	6200	4542	NO	28.3875	0	0	0	164.648	987.885	DE21	A
DE	DE21A	DEAG_BYM-K0074	DETP_BYM-K0074	Taufkirchen / Vils	48.3424	12.1397	17000	15407	NO	96.2938	0	0	0	558.504	3351.02	DE21	A
DE	DE21A	DEAG_BYM-K0080	DETP_BYM-K0080	Wartenberg	48.4156	11.9818	6000	10900	NO	68.125	0	0	0	395.125	2370.75	DE21	B
DE	DE21A	DEAG_BYM-K0083	DETP_BYM-K0083	AZV Erdinger Moos	48.3733	11.8933	320000	172383	YES	1077.39	3447.66	2585.74	5171.49	6248.88	37493.3	DE21	A
DE	DE21A	DEAG_BYM-K0088	DETP_BYM-K0088	Sankt Wolfgang	48.2253	12.1373	6000	3600	NO	22.5	0	0	0	130.5	783	DE21	B
DE	DE21A	DEAG_BYM-K0089	DETP_BYM-K0089	gku VE München-Ost	48.2252	11.8181	135000	129828	YES	811.425	2596.56	1947.42	3894.84	4706.27	28237.6	DE21	A
DE	DE21B	DEAG_BYM-K0097	DETP_BYM-K0097	Moosburg	48.4889	11.9478	50000	29643	YES	185.269	592.86	444.645	889.29	1074.56	6447.35	DE21	B
DE	DE21B	DEAG_BYM-K0107	DETP_BYM-K0107	Fahrenzhausen	48.3648	11.581	6000	5500	NO	34.375	0	0	0	199.375	1196.25	DE21	A
DE	DE21B	DEAG_BYM-K0108	DETP_BYM-K0108	ZV Unterschleißheim, Eching u. Neufahrn	48.3244	11.6978	160000	71130	YES	444.562	1422.6	1066.95	2133.9	2578.46	15470.8	DE21	B
DE	DE21B	DEAG_BYM-K0109	DETP_BYM-K0109	Hallbergmoos	48.3344	11.7477	15000	12133	NO	75.8312	0	0	0	439.821	2638.93	DE21	A
DE	DE21B	DEAG_BYM-K0110	DETP_BYM-K0110	Hohenkammer	48.4296	11.5607	6000	3163	NO	19.7688	0	0	0	114.659	687.952	DE21	C
DE	DE21B	DEAG_BYM-K0111	DETP_BYM-K0111	Freising	48.4046	11.7608	110000	66790	YES	417.438	1335.8	1001.85	2003.7	2421.14	14526.8	DE21	A
DE	DE21B	DEAG_BYM-K0114	DETP_BYM-K0114	Zolling	48.445	11.7869	8000	5987	NO	37.4188	0	0	0	217.029	1302.17	DE21	C
DE	DE21B	DEAG_BYM-K0115	DETP_BYM-K0115	Au i.d. Hallertau	48.5664	11.7419	12000	10371	NO	64.8188	0	0	0	375.949	2255.69	DE21	B
DE	DE21B	DEAG_BYM-K0116	DETP_BYM-K0116	Allershausen	48.4374	11.6055	12000	6708	NO	41.925	0	0	0	243.165	1458.99	DE21	B
DE	DE21C	DEAG_BYM-K0121	DETP_BYM-K0121	Amperverband	48.2338	11.3605	240000	169079	YES	1056.74	3381.58	2536.18	5072.37	6129.11	36774.7	DE21	B
DE	DE21C	DEAG_BYM-K0123	DETP_BYM-K0123	ZV Obere Amper	48.124	11.1778	13000	9517	NO	59.4812	0	0	0	344.991	2069.95	DE21	B
DE	DE21C	DEAG_BYM-K0126	DETP_BYM-K0126	ZV Schweinbach-Glonngruppe	48.2761	11.1664	6500	5110	NO	31.9375	0	0	0	185.238	1111.42	DE21	B
DE	DE21C	DEAG_BYM-K0127	DETP_BYM-K0127	AZV Obere Maisach	48.1926	11.1088	7000	5949	NO	37.1812	0	0	0	215.651	1293.91	DE21	C
DE	DE21C	DEAG_BYM-K0128	DETP_BYM-K0128	Mammendorf	48.2171	11.1806	10000	5783	NO	36.1438	0	0	0	209.634	1257.8	DE21	A
DE	DE21C	DEAG_BYM-K0130	DETP_BYM-K0130	Fürstenfeldbruck	48.186	11.303	100000	48388	YES	302.425	967.76	725.82	1451.64	1754.07	10524.4	DE21	A
DE	DE252	DEAG_BYN-K0002	DETP_BYN-K0002	Erlangen	49.6171	11.0009	350000	252000	YES	1575	5040	3780	7560	9135	54810	DE25	B
DE	DE253	DEAG_BYN-K0003	DETP_BYN-K0003	Fürth	49.4907	10.9875	265000	190800	YES	1192.5	3816	2862	5724	6916.5	41499	DE25	A
DE	DE253	DEAG_BYN-K0004	DETP_BYN-K0004	Fürth OT Stadeln-Vach	49.5337	10.9713	26000	17680	NO	110.5	0	0	0	640.9	3845.4	DE25	A
DE	DE254	DEAG_BYN-K0005	DETP_BYN-K0005	Nürnberg I	49.4654	11.0204	1400000	1008000	YES	6300	20160	15120	30240	36540	219240	DE25	A
DE	DE254	DEAG_BYN-K0006	DETP_BYN-K0006	Nürnberg II	49.4597	11.0433	230000	165600	YES	1035	3312	2484	4968	6003	36018	DE25	A
DE	DE255	DEAG_BYN-K0008	DETP_BYN-K0008	Schwabach	49.338	11.0587	95000	64600	YES	403.75	1292	969	1938	2341.75	14050.5	DE25	B
DE	DE257	DEAG_BYN-K0014	DETP_BYN-K0014	Röttenbach	49.654	10.9225	11000	9022	NO	56.3875	0	0	0	327.047	1962.28	DE25	B
DE	DE257	DEAG_BYN-K0016	DETP_BYN-K0016	KA Wachenroth	49.7505	10.726	6000	3249	NO	20.3063	0	0	0	117.776	706.657	DE25	B
DE	DE257	DEAG_BYN-K0020	DETP_BYN-K0020	KA Adelsdorf	49.7182	10.9097	25000	18486	NO	115.538	0	0	0	670.118	4020.7	DE25	B
DE	DE257	DEAG_BYN-K0026	DETP_BYN-K0026	Heroldsberg	49.524	11.1434	12000	10574	NO	66.0875	0	0	0	383.308	2299.84	DE25	A
DE	DE257	DEAG_BYN-K0027	DETP_BYN-K0027	Vestenbergsgreuth	49.6915	10.6666	5500	2025	NO	12.6562	0	0	0	73.4062	440.438	DE25	C
DE	DE257	DEAG_BYN-K0028	DETP_BYN-K0028	Herzogenaurach	49.562	10.9338	65000	33988	YES	212.425	679.76	509.82	1019.64	1232.06	7392.39	DE25	C
DE	DE257	DEAG_BYN-K0030	DETP_BYN-K0030	Höchstadt a.d.Aisch	49.7068	10.8455	35000	23046	NO	144.037	0	0	0	835.417	5012.5	DE25	B
DE	DE257	DEAG_BYN-K0031	DETP_BYN-K0031	AGV Mittlere Regnitz	49.6741	11.0452	25000	19301	NO	120.631	0	0	0	699.661	4197.97	DE25	B
DE	DE258	DEAG_BYN-K0032	DETP_BYN-K0032	Roßtal	49.4022	10.8949	8000	6317	NO	39.4813	0	0	0	228.991	1373.95	DE25	B
DE	DE258	DEAG_BYN-K0035	DETP_BYN-K0035	KA Veitsbronn	49.5061	10.9078	12000	8904	NO	55.65	0	0	0	322.77	1936.62	DE25	C
DE	DE258	DEAG_BYN-K0048	DETP_BYN-K0048	KA Langenzenn	49.4993	10.8099	20000	15038	NO	93.9875	0	0	0	545.128	3270.77	DE25	A
DE	DE258	DEAG_BYN-K0050	DETP_BYN-K0050	ZV Oberes Zenntal S. Wilhermsdorf	49.4837	10.7302	14000	9520	NO	59.5	0	0	0	345.1	2070.6	DE25	B
DE	DE259	DEAG_BYN-K0066	DETP_BYN-K0066	Röthenbach/Pegnitz	49.4841	11.2282	30000	20400	NO	127.5	0	0	0	739.5	4437	DE25	A
DE	DE259	DEAG_BYN-K0072	DETP_BYN-K0072	Feucht	49.3704	11.1994	28000	19040	NO	119	0	0	0	690.2	4141.2	DE25	B
DE	DE259	DEAG_BYN-K0073	DETP_BYN-K0073	Winkelhaid	49.3839	11.2826	5000	3450	NO	21.5625	0	0	0	125.062	750.375	DE25	C
DE	DE259	DEAG_BYN-K0090	DETP_BYN-K0090	Neuhaus/Pegnitz	49.6258	11.548	5700	3705	NOT KNOWN	23.1562	0	0	0	134.306	805.837	DE25	A
DE	DE259	DEAG_BYN-K0095	DETP_BYN-K0095	Leinburg	49.4545	11.2749	12000	8160	NO	51	0	0	0	295.8	1774.8	DE25	A
DE	DE259	DEAG_BYN-K0096	DETP_BYN-K0096	Altdorf/Nürnberg	49.3687	11.3945	20000	13600	NO	85	0	0	0	493	2958	DE25	C
DE	DE259	DEAG_BYN-K0097	DETP_BYN-K0097	Hersbruck	49.5052	11.4029	36000	24480	NO	153	0	0	0	887.4	5324.4	DE25	B
DE	DE259	DEAG_BYN-K0098	DETP_BYN-K0098	ZV Schwarzachgruppe Sitz Schwarzenbruck	49.3519	11.2221	33000	22440	NO	140.25	0	0	0	813.45	4880.7	DE25	A
DE	DE259	DEAG_BYN-K0099	DETP_BYN-K0099	Lauf/Pegnitz	49.5051	11.273	49000	33320	YES	208.25	666.4	499.8	999.6	1207.85	7247.1	DE25	A
DE	DE259	DEAG_BYN-K0104	DETP_BYN-K0104	ZV Schnaittachtal	49.5187	11.3262	45000	30600	NO	191.25	0	0	0	1109.25	6655.5	DE25	A
DE	DE25B	DEAG_BYN-K0106	DETP_BYN-K0106	Büchenbach	49.2702	11.075	5000	2626	NO	16.4125	0	0	0	95.1925	571.155	DE25	B
DE	DE25B	DEAG_BYN-K0113	DETP_BYN-K0113	Greding	49.0361	11.3633	8000	6556	NO	40.975	0	0	0	237.655	1425.93	DE25	B
DE	DE25B	DEAG_BYN-K0117	DETP_BYN-K0117	Georgensgmünd	49.1952	11.0299	20000	9941	NO	62.1313	0	0	0	360.361	2162.17	DE25	B
DE	DE25B	DEAG_BYN-K0125	DETP_BYN-K0125	Rednitzhembach	49.3069	11.0732	8000	6684	NO	41.775	0	0	0	242.295	1453.77	DE25	A
DE	DE25B	DEAG_BYN-K0148	DETP_BYN-K0148	Heideck	49.1423	11.1556	12000	7967	NO	49.7937	0	0	0	288.804	1732.82	DE25	B
DE	DE25B	DEAG_BYN-K0149	DETP_BYN-K0149	Abenberg	49.2393	10.9762	8000	5130	NO	32.0625	0	0	0	185.962	1115.77	DE25	B
DE	DE25B	DEAG_BYN-K0154	DETP_BYN-K0154	Hilpoltstein	49.1899	11.1583	25000	16589	NO	103.681	0	0	0	601.351	3608.11	DE25	C
DE	DE25B	DEAG_BYN-K0173	DETP_BYN-K0173	Spalt	49.1778	10.9355	12000	11987	NO	74.9188	0	0	0	434.529	2607.17	DE25	B
DE	DE25B	DEAG_BYN-K0177	DETP_BYN-K0177	Thalmässing	49.0876	11.2401	5300	4133	NO	25.8313	0	0	0	149.821	898.927	DE25	C
DE	DE25B	DEAG_BYN-K0179	DETP_BYN-K0179	ZV Unteres Schwarzachtal S.Wendelstein	49.3417	11.1068	40000	32571	YES	203.569	651.42	488.565	977.13	1180.7	7084.19	DE25	A
DE	DE25B	DEAG_BYN-K0180	DETP_BYN-K0180	KA Roth Stadt	49.2523	11.081	65000	36000	YES	225	720	540	1080	1305	7830	DE25	B
DE	DE238	DEAG_BYR-K0001	DETP_BYR-K0001	Regensburg	49.0062	12.1846	400000	288824	YES	1805.15	5776.48	4332.36	8664.72	10469.9	62819.2	DE23	A
DE	DE235	DEAG_BYR-K0003	DETP_BYR-K0003	Furth im Wald	49.3024	12.8345	25000	18333	NO	114.581	0	0	0	664.571	3987.43	DE23	A
DE	DE235	DEAG_BYR-K0005	DETP_BYR-K0005	Waldmünchen	49.3811	12.6906	13000	9454	NO	59.0875	0	0	0	342.707	2056.24	DE23	A
DE	DE235	DEAG_BYR-K0016	DETP_BYR-K0016	Zandt	49.1438	12.7436	5000	2076	NO	12.975	0	0	0	75.255	451.53	DE23	C
DE	DE235	DEAG_BYR-K0019	DETP_BYR-K0019	Rötz	49.3393	12.5159	9000	3269	NO	20.4313	0	0	0	118.501	711.007	DE23	B
DE	DE235	DEAG_BYR-K0057	DETP_BYR-K0057	Bad Kötzting	49.1671	12.835	20000	12916	NO	80.725	0	0	0	468.205	2809.23	DE23	C
DE	DE235	DEAG_BYR-K0060	DETP_BYR-K0060	ZV Lamer Winkel	49.2022	12.9886	21500	11060	NO	69.125	0	0	0	400.925	2405.55	DE23	B
DE	DE235	DEAG_BYR-K0061	DETP_BYR-K0061	Cham	49.224	12.6451	38200	51554	YES	322.213	1031.08	773.31	1546.62	1868.83	11213	DE23	A
DE	DE235	DEAG_BYR-K0062	DETP_BYR-K0062	Roding	49.1929	12.5007	25000	11056	NO	69.1	0	0	0	400.78	2404.68	DE23	B
DE	DE236	DEAG_BYR-K0069	DETP_BYR-K0069	Mühlhausen	49.1639	11.45	6700	7173	NO	44.8313	0	0	0	260.021	1560.13	DE23	A
DE	DE236	DEAG_BYR-K0074	DETP_BYR-K0074	Hohenfels-Milit. Einrichtung	49.2178	11.8404	12000	2555	NO	15.9688	0	0	0	92.6188	555.712	DE23	A
DE	DE236	DEAG_BYR-K0078	DETP_BYR-K0078	Postbauer-Heng	49.2927	11.3376	10000	9703	NO	60.6438	0	0	0	351.734	2110.4	DE23	B
DE	DE236	DEAG_BYR-K0082	DETP_BYR-K0082	Berching	49.0939	11.4458	12000	5247	NO	32.7938	0	0	0	190.204	1141.22	DE23	A
DE	DE236	DEAG_BYR-K0091	DETP_BYR-K0091	Berg	49.3474	11.4373	10000	7166	NO	44.7875	0	0	0	259.767	1558.61	DE23	B
DE	DE236	DEAG_BYR-K0092	DETP_BYR-K0092	Parsberg	49.17	11.7304	13300	10969	NO	68.5563	0	0	0	397.626	2385.76	DE23	A
DE	DE236	DEAG_BYR-K0096	DETP_BYR-K0096	Velburg	49.1979	11.6599	11000	6571	NO	41.0688	0	0	0	238.199	1429.19	DE23	C
DE	DE236	DEAG_BYR-K0098	DETP_BYR-K0098	Neumarkt/Opf.	49.301	11.4673	150000	107802	YES	673.763	2156.04	1617.03	3234.06	3907.82	23446.9	DE23	A
DE	DE236	DEAG_BYR-K0101	DETP_BYR-K0101	Freystadt	49.1917	11.3332	8000	6302	NO	39.3875	0	0	0	228.448	1370.69	DE23	B
DE	DE236	DEAG_BYR-K0102	DETP_BYR-K0102	Dietfurt	49.0215	11.5927	6500	5832	NO	36.45	0	0	0	211.41	1268.46	DE23	B
DE	DE238	DEAG_BYR-K0106	DETP_BYR-K0106	Schierling	48.8357	12.1514	16200	12394	NO	77.4625	0	0	0	449.282	2695.69	DE23	B
DE	DE238	DEAG_BYR-K0108	DETP_BYR-K0108	Beratzhausen	49.0931	11.8154	6500	4278	NO	26.7375	0	0	0	155.077	930.465	DE23	A
DE	DE238	DEAG_BYR-K0112	DETP_BYR-K0112	Bernhardswald	49.0922	12.226	6300	2414	NO	15.0875	0	0	0	87.5075	525.045	DE23	C
DE	DE238	DEAG_BYR-K0113	DETP_BYR-K0113	Pfatter	48.9714	12.3951	6000	2641	NOT KNOWN	16.5063	0	0	0	95.7362	574.417	DE23	B
DE	DE238	DEAG_BYR-K0118	DETP_BYR-K0118	Nittendorf OT Etterzhausen	49.0255	11.9882	6300	2246	NO	14.0375	0	0	0	81.4175	488.505	DE23	B
DE	DE238	DEAG_BYR-K0119	DETP_BYR-K0119	ZV Pfattertal Sitz Mintraching	48.9443	12.241	18000	13648	NO	85.3	0	0	0	494.74	2968.44	DE23	B
DE	DE238	DEAG_BYR-K0121	DETP_BYR-K0121	Sinzing	48.9998	12.0337	6000	2529	NOT KNOWN	15.8063	0	0	0	91.6762	550.058	DE23	A
DE	DE238	DEAG_BYR-K0122	DETP_BYR-K0122	ZV Wörth a.d. Donau Sitz Wörth	48.9941	12.4071	9800	9578	NO	59.8625	0	0	0	347.202	2083.21	DE23	A
DE	DE238	DEAG_BYR-K0129	DETP_BYR-K0129	Laaber	49.0648	11.9011	7500	4983	NO	31.1438	0	0	0	180.634	1083.8	DE23	C
DE	DE238	DEAG_BYR-K0131	DETP_BYR-K0131	Sinzing OT Eilsbrunn	49.0024	11.9663	5800	2369	NOT KNOWN	14.8063	0	0	0	85.8762	515.258	DE23	B
DE	DE238	DEAG_BYR-K0133	DETP_BYR-K0133	ZV Labertal Sitz Nittendorf	49.0246	11.9253	9000	8697	NO	54.3562	0	0	0	315.266	1891.6	DE23	A
DE	DE238	DEAG_BYR-K0137	DETP_BYR-K0137	Hemau	49.0694	11.8239	16000	5138	NO	32.1125	0	0	0	186.252	1117.51	DE23	C
DE	DE213	DEAG_BYRO-K0001	DETP_BYRO-K0001	Rosenheim	47.8762	12.1299	350000	112887	YES	705.544	2257.74	1693.31	3386.61	4092.15	24552.9	DE21	A
DE	DE21F	DEAG_BYRO-K0003	DETP_BYRO-K0003	Holzkirchen Fellach	47.9083	11.7425	50000	34000	YES	212.5	680	510	1020	1232.5	7395	DE21	C
DE	DE21F	DEAG_BYRO-K0009	DETP_BYRO-K0009	Valley	47.8932	11.7753	5000	3450	NO	21.5625	0	0	0	125.062	750.375	DE21	B
DE	DE21F	DEAG_BYRO-K0011	DETP_BYRO-K0011	ZV Tegernsee Sitz Gmund a.T.	47.7647	11.7578	60000	59553	YES	372.206	1191.06	893.295	1786.59	2158.8	12952.8	DE21	C
DE	DE21F	DEAG_BYRO-K0012	DETP_BYRO-K0012	Irschenberg	47.841	11.9215	5000	3450	NO	21.5625	0	0	0	125.062	750.375	DE21	C
DE	DE21F	DEAG_BYRO-K0013	DETP_BYRO-K0013	ZV Schlierachtal Sitz Miesbach	47.803	11.825	80000	32165	YES	201.031	643.3	482.475	964.95	1165.98	6995.89	DE21	A
DE	DE21F	DEAG_BYRO-K0015	DETP_BYRO-K0015	Fischbachau OT Wörnsmühl	47.7739	11.9004	12000	8160	NO	51	0	0	0	295.8	1774.8	DE21	C
DE	DE21G	DEAG_BYRO-K0025	DETP_BYRO-K0025	Neumarkt-St.Veit	48.3659	12.5215	15000	8183	NO	51.1438	0	0	0	296.634	1779.8	DE21	B
DE	DE21G	DEAG_BYRO-K0039	DETP_BYRO-K0039	Haag/Ob	48.146	12.199	30000	46919	NO	293.244	0	0	0	1700.81	10204.9	DE21	C
DE	DE21G	DEAG_BYRO-K0044	DETP_BYRO-K0044	Waldkraiburg	48.2026	12.421	64500	45524	YES	284.525	910.48	682.86	1365.72	1650.25	9901.47	DE21	A
DE	DE21G	DEAG_BYRO-K0045	DETP_BYRO-K0045	Gars/Inn	48.1529	12.2835	5600	6250	NO	39.0625	0	0	0	226.562	1359.38	DE21	B
DE	DE21G	DEAG_BYRO-K0046	DETP_BYRO-K0046	Mühldorf a.Inn	48.2374	12.5442	30000	24997	NO	156.231	0	0	0	906.141	5436.85	DE21	A
DE	DE21G	DEAG_BYRO-K0052	DETP_BYRO-K0052	Ampfing	48.2605	12.4294	24000	15905	NO	99.4062	0	0	0	576.556	3459.34	DE21	A
DE	DE21K	DEAG_BYRO-K0054	DETP_BYRO-K0054	Kiefersfelden	47.607	12.1994	20000	10125	NO	63.2812	0	0	0	367.031	2202.19	DE21	A
DE	DE21K	DEAG_BYRO-K0059	DETP_BYRO-K0059	Halfing	47.9474	12.2673	5000	4166	NO	26.0375	0	0	0	151.017	906.105	DE21	B
DE	DE21K	DEAG_BYRO-K0062	DETP_BYRO-K0062	Bad Feilnbach	47.7957	12.0159	20000	11029	NO	68.9313	0	0	0	399.801	2398.81	DE21	C
DE	DE21K	DEAG_BYRO-K0065	DETP_BYRO-K0065	Bad Aibling	47.8499	12.0259	36000	64660	NO	404.125	0	0	0	2343.92	14063.5	DE21	B
DE	DE21K	DEAG_BYRO-K0071	DETP_BYRO-K0071	Feldkirchen-Westerham	47.8922	11.8648	20000	12632	NO	78.95	0	0	0	457.91	2747.46	DE21	B
DE	DE21K	DEAG_BYRO-K0082	DETP_BYRO-K0082	Oberaudorf	47.6726	12.1732	15500	5440	NO	34	0	0	0	197.2	1183.2	DE21	B
DE	DE21K	DEAG_BYRO-K0085	DETP_BYRO-K0085	Eggstätt	47.9302	12.3914	6500	2368	NO	14.8	0	0	0	85.84	515.04	DE21	A
DE	DE21K	DEAG_BYRO-K0102	DETP_BYRO-K0102	Raubling	47.8112	12.1254	33700	10733	NO	67.0812	0	0	0	389.071	2334.43	DE21	B
DE	DE21K	DEAG_BYRO-K0104	DETP_BYRO-K0104	ZV Simssee-Prien-Achental	47.8398	12.1569	65000	43040	YES	269	860.8	645.6	1291.2	1560.2	9361.2	DE21	B
DE	DE21K	DEAG_BYRO-K0108	DETP_BYRO-K0108	Wasserburg/Inn	48.0712	12.2181	50000	59163	YES	369.769	1183.26	887.445	1774.89	2144.66	12868	DE21	C
DE	DE21K	DEAG_BYRO-K0112	DETP_BYRO-K0112	ZV Brannenburg-Flintsbach	47.7416	12.1204	29000	13171	NO	82.3188	0	0	0	477.449	2864.69	DE21	C
DE	DE21K	DEAG_BYRO-K0113	DETP_BYRO-K0113	Bruckmühl	47.8668	11.9702	25000	18163	NO	113.519	0	0	0	658.409	3950.45	DE21	A
DE	DE21K	DEAG_BYRO-K0116	DETP_BYRO-K0116	ZV Chiemsee	47.8603	12.2833	85000	67966	YES	424.787	1359.32	1019.49	2038.98	2463.77	14782.6	DE21	C
DE	DE218	DEAG_BYRO-K0126	DETP_BYRO-K0126	Ebersberg	48.0785	11.9881	18100	7750	NO	48.4375	0	0	0	280.937	1685.62	DE21	C
DE	DE218	DEAG_BYRO-K0130	DETP_BYRO-K0130	Aßling	47.9864	12.0112	8000	5941	NO	37.1313	0	0	0	215.361	1292.17	DE21	B
DE	DE218	DEAG_BYRO-K0134	DETP_BYRO-K0134	Glonn	47.9821	11.8726	7300	3627	NO	22.6687	0	0	0	131.479	788.872	DE21	B
DE	DE218	DEAG_BYRO-K0137	DETP_BYRO-K0137	Grafing/München	48.0374	11.9754	26000	14949	NO	93.4312	0	0	0	541.901	3251.41	DE21	B
DE	DE214	DEAG_BYTS-K0001	DETP_BYTS-K0001	Altötting-Neuötting	48.2556	12.7036	48500	41891	YES	261.819	837.82	628.365	1256.73	1518.55	9111.29	DE21	C
DE	DE214	DEAG_BYTS-K0003	DETP_BYTS-K0003	Burghausen	48.1748	12.8479	30000	20400	NO	127.5	0	0	0	739.5	4437	DE21	A
DE	DE214	DEAG_BYTS-K0006	DETP_BYTS-K0006	Garching/Alz	48.1373	12.6153	18000	13226	NO	82.6625	0	0	0	479.443	2876.66	DE21	B
DE	DE214	DEAG_BYTS-K0007	DETP_BYTS-K0007	Marktl	48.2472	12.8638	6000	3717	NO	23.2313	0	0	0	134.741	808.447	DE21	C
DE	DE214	DEAG_BYTS-K0008	DETP_BYTS-K0008	Töging/Inn	48.2477	12.6015	22000	24326	NO	152.037	0	0	0	881.817	5290.9	DE21	B
DE	DE40H	DEAG_BB418	DETP_BB418	Zossen Tandem-KA	52.1975	13.4653	49666	35348	YES	220.925	706.96	530.22	1060.44	1281.36	7688.19	DE40	B
DE	DE40C	DEAG_BB44	DETP_BB44	Eisenhüttenstadt	52.1222	14.6514	99000	40553	YES	253.456	811.06	608.295	1216.59	1470.05	8820.28	DE40	B
DE	DE407	DEAG_BB46	DETP_BB46	Elsterwerda	51.4585	13.5401	80000	18816	YES	117.6	376.32	282.24	564.48	682.08	4092.48	DE40	A
DE	DE40D	DEAG_BB48	DETP_BB48	Fehrbellin	52.8134	12.7406	15000	9286	NO	58.0375	0	0	0	336.617	2019.7	DE40	C
DE	DE40I	DEAG_BB5	DETP_BB5	Angermünde	53.0241	13.9784	16000	10321	NO	64.5063	0	0	0	374.136	2244.82	DE40	B
DE	DE407	DEAG_BB50	DETP_BB50	Finsterwalde	51.6186	13.7017	25000	17304	NO	108.15	0	0	0	627.27	3763.62	DE40	A
DE	DE40G	DEAG_BB52	DETP_BB52	Forst	51.7611	14.6499	30000	17531	NO	109.569	0	0	0	635.499	3812.99	DE40	B
DE	DE403	DEAG_BB53	DETP_BB53	Frankfurt (Oder)	52.3683	14.5475	120000	65038	YES	406.488	1300.76	975.57	1951.14	2357.63	14145.8	DE40	A
DE	DE407	DEAG_BB6	DETP_BB6	Bad Liebenwerda	51.5228	13.3892	20000	8606	NO	53.7875	0	0	0	311.967	1871.8	DE40	B
DE	DE40C	DEAG_BB60	DETP_BB60	Friedland	52.1106	14.2461	7500	4863	NO	30.3938	0	0	0	176.284	1057.7	DE40	C
DE	DE40A	DEAG_BB64	DETP_BB64	Fürstenberg/Bredereiche	53.1444	13.2272	8000	5814	NO	36.3375	0	0	0	210.757	1264.54	DE40	C
DE	DE40C	DEAG_BB65	DETP_BB65	Fürstenwalde	52.3783	14.0088	60000	47359	YES	295.994	947.18	710.385	1420.77	1716.76	10300.6	DE40	C
DE	DE40I	DEAG_BB68	DETP_BB68	Gartz	53.2171	14.4025	6000	4890	NO	30.5625	0	0	0	177.262	1063.57	DE40	B
DE	DE40F	DEAG_BB7	DETP_BB7	Bad Wilsnack	52.9638	11.9443	6000	2631	NO	16.4438	0	0	0	95.3738	572.242	DE40	B
DE	DE40I	DEAG_BB72	DETP_BB72	Gerswalde	53.1622	13.7672	5000	3105	NO	19.4062	0	0	0	112.556	675.337	DE40	C
DE	DE40H	DEAG_BB8	DETP_BB8	Baruth	52.0419	13.5252	8000	3234	NO	20.2125	0	0	0	117.233	703.395	DE40	C
DE	DE40B	DEAG_BB9	DETP_BB9	BASF Schwarzheide	51.4828	13.8979	15000	14639	NO	91.4937	0	0	0	530.664	3183.98	DE40	A
DE	DE40B	DEAG_BB90	DETP_BB90	Großräschen	51.578	14.0329	25000	13388	NO	83.675	0	0	0	485.315	2911.89	DE40	A
DE	DE40A	DEAG_BB91	DETP_BB91	Grüneberg-Hallegraben	52.8622	13.2384	12000	8116	NO	50.725	0	0	0	294.205	1765.23	DE40	C
DE	DE21M	DEAG_BYTS-K0036	DETP_BYTS-K0036	Waging/See	47.9279	12.8309	32500	37021	NO	231.381	0	0	0	1342.01	8052.07	DE21	C
DE	DE215	DEAG_BYTS-K0037	DETP_BYTS-K0037	ZV Saalachtal Sitz Piding	47.7659	12.9184	18000	38149	NO	238.431	0	0	0	1382.9	8297.41	DE21	A
DE	DE215	DEAG_BYTS-K0040	DETP_BYTS-K0040	Teisendorf	47.8541	12.833	9000	11183	NO	69.8937	0	0	0	405.384	2432.3	DE21	B
DE	DE215	DEAG_BYTS-K0041	DETP_BYTS-K0041	Bayerisch Gmain	47.729	12.9063	12000	6930	NO	43.3125	0	0	0	251.213	1507.27	DE21	B
DE	DE215	DEAG_BYTS-K0042	DETP_BYTS-K0042	Freilassing	47.8432	12.9895	32000	28410	NO	177.562	0	0	0	1029.86	6179.17	DE21	A
DE	DE215	DEAG_BYTS-K0051	DETP_BYTS-K0051	Bad Reichenhall	47.7641	12.9249	58000	33831	YES	211.444	676.62	507.465	1014.93	1226.37	7358.24	DE21	A
DE	DE215	DEAG_BYTS-K0055	DETP_BYTS-K0055	Berchtesgaden	47.6481	13.0355	60000	43008	YES	268.8	860.16	645.12	1290.24	1559.04	9354.24	DE21	C
DE	DE233	DEAG_BYWEN-K0001	DETP_BYWEN-K0001	Weiden i. d. Opf.	49.6618	12.1606	100000	53475	YES	334.219	1069.5	802.125	1604.25	1938.47	11630.8	DE23	A
DE	DE237	DEAG_BYWEN-K0006	DETP_BYWEN-K0006	AZV Weiherhammer u. Mantel	49.6335	12.0708	9500	7095	NO	44.3438	0	0	0	257.194	1543.16	DE23	B
DE	DE237	DEAG_BYWEN-K0008	DETP_BYWEN-K0008	Pressath	49.754	11.9459	7900	4173	NO	26.0813	0	0	0	151.271	907.627	DE23	B
DE	DE237	DEAG_BYWEN-K0010	DETP_BYWEN-K0010	Eslarn	49.5861	12.5116	5800	2865	NO	17.9062	0	0	0	103.856	623.137	DE23	A
DE	DE237	DEAG_BYWEN-K0013	DETP_BYWEN-K0013	Grafenwöhr	49.7087	11.9313	25000	18890	NO	118.062	0	0	0	684.762	4108.57	DE23	A
DE	DE237	DEAG_BYWEN-K0015	DETP_BYWEN-K0015	Floß	49.7293	12.269	9000	5146	NO	32.1625	0	0	0	186.543	1119.26	DE23	B
DE	DE237	DEAG_BYWEN-K0022	DETP_BYWEN-K0022	Windischeschenbach	49.7912	12.168	12000	9172	NO	57.325	0	0	0	332.485	1994.91	DE23	A
DE	DE405	DEAG_BE02	DETP_BE02	Schönerlinde	52.6512	13.4223	840000	841089	YES	5256.81	16821.8	12616.3	25232.7	30489.5	182937	DE40	A
DE	DE300	DEAG_BE03	DETP_BE03	Waßmannsdorf	52.3852	13.4646	1400000	2023000	YES	12643.8	40460	30345	60690	73333.7	440002	DE40	A
DE	DE80N	DEAG_MV01.01.1 wbu980	DETP_MV01.01.1 wbu980	Greifswald	54.1158	13.439	96000	83834	YES	523.962	1676.68	1257.51	2515.02	3038.98	18233.9	DE80	C
DE	DE237	DEAG_BYWEN-K0024	DETP_BYWEN-K0024	AZV Pirk-Schirmitz	49.6345	12.1515	8500	3930	NO	24.5625	0	0	0	142.463	854.775	DE23	B
DE	DE237	DEAG_BYWEN-K0025	DETP_BYWEN-K0025	Pleystein	49.6469	12.4202	7500	3230	NO	20.1875	0	0	0	117.087	702.525	DE23	B
DE	DE80J	DEAG_MV02.02.1 wbu147	DETP_MV02.02.1 wbu147	Neubrandenburg	53.5681	13.2421	140000	67928	YES	424.55	1358.56	1018.92	2037.84	2462.39	14774.3	DE80	A
DE	DE803	DEAG_MV03.03.1 wbu1437	DETP_MV03.03.1 wbu1437	Rostock - Bramow	54.1042	12.0963	400000	325903	YES	2036.89	6518.06	4888.55	9777.09	11814	70883.9	DE80	A
DE	DE804	DEAG_MV04.04.2 wbu1228	DETP_MV04.04.2 wbu1228	Schwerin Süd	53.5235	11.358	200000	158151	YES	988.444	3163.02	2372.26	4744.53	5732.97	34397.8	DE80	C
DE	DE80L	DEAG_MV05.05.1 wbu399	DETP_MV05.05.1 wbu399	Stralsund	54.2985	13.1007	85000	91759	YES	573.494	1835.18	1376.38	2752.77	3326.26	19957.6	DE80	A
DE	DE237	DEAG_BYWEN-K0044	DETP_BYWEN-K0044	Vohenstrauß	49.6048	12.307	17500	7617	NO	47.6062	0	0	0	276.116	1656.7	DE23	C
DE	DE237	DEAG_BYWEN-K0050	DETP_BYWEN-K0050	Eschenbach	49.7585	11.85	13000	8693	NO	54.3313	0	0	0	315.121	1890.73	DE23	A
DE	DE237	DEAG_BYWEN-K0076	DETP_BYWEN-K0076	AZV Altenstadt - Neustadt - Störnstein	49.7118	12.1705	30000	15610	NO	97.5625	0	0	0	565.862	3395.17	DE23	B
DE	DE23A	DEAG_BYWEN-K0092	DETP_BYWEN-K0092	Waldsassen	50.0065	12.3145	13000	10558	NO	65.9875	0	0	0	382.727	2296.36	DE23	A
DE	DE23A	DEAG_BYWEN-K0097	DETP_BYWEN-K0097	Friedenfels	49.8776	12.118	7000	2941	NO	18.3813	0	0	0	106.611	639.667	DE23	C
DE	DE214	DEAG_BYTS-K0011	DETP_BYTS-K0011	Emmerting-Mehring	48.2092	12.7807	7000	4112	NO	25.7	0	0	0	149.06	894.36	DE21	C
DE	DE214	DEAG_BYTS-K0014	DETP_BYTS-K0014	Burgkirchen/Alz	48.1783	12.7477	14000	11395	NO	71.2188	0	0	0	413.069	2478.41	DE21	A
DE	DE21M	DEAG_BYTS-K0016	DETP_BYTS-K0016	Reit Im Winkl	47.6676	12.4566	14000	6117	NO	38.2313	0	0	0	221.741	1330.45	DE21	C
DE	DE21M	DEAG_BYTS-K0017	DETP_BYTS-K0017	Bergen	47.8176	12.5857	7500	5635	NO	35.2188	0	0	0	204.269	1225.61	DE21	A
DE	DE21M	DEAG_BYTS-K0021	DETP_BYTS-K0021	Traunstein	47.8865	12.6388	99000	75830	YES	473.938	1516.6	1137.45	2274.9	2748.84	16493	DE21	A
DE	DE21M	DEAG_BYTS-K0023	DETP_BYTS-K0023	Inzell	47.7627	12.7373	13000	9623	NO	60.1438	0	0	0	348.834	2093	DE21	A
DE	DE21M	DEAG_BYTS-K0024	DETP_BYTS-K0024	Traunreut OT Stein/Traun	47.9793	12.5484	7500	9309	NO	58.1813	0	0	0	337.451	2024.71	DE21	A
DE	DE21M	DEAG_BYTS-K0027	DETP_BYTS-K0027	Engelsberg	48.1102	12.5738	10000	7185	NO	44.9062	0	0	0	260.456	1562.74	DE21	B
DE	DE21M	DEAG_BYTS-K0029	DETP_BYTS-K0029	Tacherting	48.0872	12.5734	9000	6435	NO	40.2188	0	0	0	233.269	1399.61	DE21	B
DE	DE21M	DEAG_BYTS-K0030	DETP_BYTS-K0030	Ruhpolding	47.7735	12.644	20000	10212	NO	63.825	0	0	0	370.185	2221.11	DE21	A
DE	DE21M	DEAG_BYTS-K0031	DETP_BYTS-K0031	Traunreut	47.9528	12.5875	35000	41151	NO	257.194	0	0	0	1491.72	8950.34	DE21	B
DE	DE21M	DEAG_BYTS-K0032	DETP_BYTS-K0032	Tittmoning	48.0667	12.764	8200	6083	NO	38.0188	0	0	0	220.509	1323.05	DE21	A
DE	DE21M	DEAG_BYTS-K0033	DETP_BYTS-K0033	Altenmarkt/Alz	48.0062	12.5375	13000	11115	NO	69.4688	0	0	0	402.919	2417.51	DE21	A
DE	DE21M	DEAG_BYTS-K0034	DETP_BYTS-K0034	AZV Achental Sitz Grassau	47.7932	12.4857	25000	18641	NO	116.506	0	0	0	675.736	4054.42	DE21	C
DE	DE21M	DEAG_BYTS-K0035	DETP_BYTS-K0035	Trostberg	48.0412	12.5693	25000	13175	NO	82.3438	0	0	0	477.594	2865.56	DE21	A
DE	DE221	DEAG_BYLA-K0001	DETP_BYLA-K0001	Klärwerk Landshut	48.5855	12.2376	260000	103733	YES	648.331	2074.66	1555.99	3111.99	3760.32	22561.9	DE22	C
DE	DE226	DEAG_BYLA-K0005	DETP_BYLA-K0005	Mainburg	48.6572	11.7906	27000	16212	NO	101.325	0	0	0	587.685	3526.11	DE22	B
DE	DE226	DEAG_BYLA-K0010	DETP_BYLA-K0010	Riedenburg	48.9589	11.6969	12000	13646	NO	85.2875	0	0	0	494.668	2968.01	DE22	A
DE	DE226	DEAG_BYLA-K0015	DETP_BYLA-K0015	Neustadt/Donau	48.8171	11.766	18000	28895	NO	180.594	0	0	0	1047.44	6284.66	DE22	B
DE	DE226	DEAG_BYLA-K0016	DETP_BYLA-K0016	ZV Im Raume Kelheim Sitz Kelheim	48.9086	11.9309	70000	45003	YES	281.269	900.06	675.045	1350.09	1631.36	9788.15	DE22	A
DE	DE226	DEAG_BYLA-K0017	DETP_BYLA-K0017	Langquaid	48.8308	12.0952	8500	6347	NO	39.6688	0	0	0	230.079	1380.47	DE22	C
DE	DE226	DEAG_BYLA-K0019	DETP_BYLA-K0019	Siegenburg	48.763	11.8429	5600	6978	NO	43.6125	0	0	0	252.952	1517.71	DE22	B
DE	DE226	DEAG_BYLA-K0025	DETP_BYLA-K0025	Bad Abbach	48.9366	12.0288	16000	14005	NO	87.5312	0	0	0	507.681	3046.09	DE22	B
DE	DE226	DEAG_BYLA-K0030	DETP_BYLA-K0030	Abensberg	48.8189	11.8304	24800	16453	NO	102.831	0	0	0	596.421	3578.53	DE22	A
DE	DE227	DEAG_BYLA-K0035	DETP_BYLA-K0035	Hohenthann	48.6604	12.0797	9999	10177	NO	63.6062	0	0	0	368.916	2213.5	DE22	B
DE	DE227	DEAG_BYLA-K0041	DETP_BYLA-K0041	Velden	48.3773	12.2691	7000	3940	NO	24.625	0	0	0	142.825	856.95	DE22	C
DE	DE227	DEAG_BYLA-K0051	DETP_BYLA-K0051	Geisenhausen	48.4746	12.2693	7000	5657	NO	35.3563	0	0	0	205.066	1230.4	DE22	A
DE	DE227	DEAG_BYLA-K0065	DETP_BYLA-K0065	Binabiburg	48.4428	12.4301	5000	4374	NO	27.3375	0	0	0	158.558	951.345	DE22	B
DE	DE227	DEAG_BYLA-K0066	DETP_BYLA-K0066	ZV AW Ergoldsbach-Neufahrn S.Ergoldsbach	48.7397	12.1883	16000	14298	NO	89.3625	0	0	0	518.302	3109.81	DE22	A
DE	DE227	DEAG_BYLA-K0067	DETP_BYLA-K0067	Pfeffenhausen	48.6707	11.9732	7500	5242	NO	32.7625	0	0	0	190.023	1140.13	DE22	A
DE	DE23A	DEAG_BYWEN-K0111	DETP_BYWEN-K0111	Kemnath	49.8511	11.8891	50000	30683	YES	191.769	613.66	460.245	920.49	1112.26	6673.55	DE23	C
DE	DE23A	DEAG_BYWEN-K0114	DETP_BYWEN-K0114	Neusorg	49.914	11.9715	5000	2740	NO	17.125	0	0	0	99.325	595.95	DE23	C
DE	DE23A	DEAG_BYWEN-K0123	DETP_BYWEN-K0123	Wiesau	49.8847	12.2132	10000	6339	NO	39.6187	0	0	0	229.789	1378.73	DE23	C
DE	DE23A	DEAG_BYWEN-K0126	DETP_BYWEN-K0126	Erbendorf	49.8341	12.0684	7800	5292	NO	33.075	0	0	0	191.835	1151.01	DE23	A
DE	DE23A	DEAG_BYWEN-K0128	DETP_BYWEN-K0128	Mitterteich	49.9545	12.2517	22000	22376	NO	139.85	0	0	0	811.13	4866.78	DE23	B
DE	DE23A	DEAG_BYWEN-K0129	DETP_BYWEN-K0129	Tirschenreuth	49.8826	12.3099	25000	15141	NO	94.6313	0	0	0	548.861	3293.17	DE23	A
DE	DE237	DEAG_BYWEN-K0132	DETP_BYWEN-K0132	Moosbach	49.5908	12.384	5225	2372	NO	14.825	0	0	0	85.985	515.91	DE23	C
DE	DE234	DEAG_BYWEN-K0136	DETP_BYWEN-K0136	Auerbach Opf.	49.7006	11.6243	8000	8313	NO	51.9563	0	0	0	301.346	1808.08	DE23	B
DE	DE234	DEAG_BYWEN-K0137	DETP_BYWEN-K0137	Schnaittenbach	49.5522	12.0353	7000	2708	NO	16.925	0	0	0	98.165	588.99	DE23	C
DE	DE234	DEAG_BYWEN-K0138	DETP_BYWEN-K0138	Vilseck	49.6044	11.7813	12000	8805	NO	55.0312	0	0	0	319.181	1915.09	DE23	B
DE	DE234	DEAG_BYWEN-K0155	DETP_BYWEN-K0155	Vilseck Südlager US Streitkräfte	49.6305	11.7988	15000	5244	NO	32.775	0	0	0	190.095	1140.57	DE23	B
DE	DE234	DEAG_BYWEN-K0158	DETP_BYWEN-K0158	Hahnbach	49.5225	11.7983	8500	6700	NO	41.875	0	0	0	242.875	1457.25	DE23	B
DE	DE234	DEAG_BYWEN-K0159	DETP_BYWEN-K0159	Zab Amberg-Kümmersbruck, Sitz Amberg	49.3791	11.9135	170000	167193	YES	1044.96	3343.86	2507.89	5015.79	6060.75	36364.5	DE23	C
DE	DE234	DEAG_BYWEN-K0165	DETP_BYWEN-K0165	ZV Unteres Vilstal, Sitz Rieden	49.2906	11.9408	7000	5550	NO	34.6875	0	0	0	201.188	1207.12	DE23	B
DE	DE234	DEAG_BYWEN-K0172	DETP_BYWEN-K0172	Sulzbach-Rosenberg	49.4929	11.7879	45000	33962	YES	212.263	679.24	509.43	1018.86	1231.12	7386.73	DE23	A
DE	DE234	DEAG_BYWEN-K0179	DETP_BYWEN-K0179	Hirschau	49.5446	11.9674	11000	3317	NO	20.7312	0	0	0	120.241	721.447	DE23	A
DE	DE239	DEAG_BYWEN-K0189	DETP_BYWEN-K0189	ZV Sulzbachtal	49.2023	12.2598	43000	23757	YES	148.481	475.14	356.355	712.71	861.191	5167.15	DE23	B
DE	DE239	DEAG_BYWEN-K0190	DETP_BYWEN-K0190	Neunburg v.W.	49.3587	12.3658	17000	10631	NO	66.4438	0	0	0	385.374	2312.24	DE23	C
DE	DE239	DEAG_BYWEN-K0204	DETP_BYWEN-K0204	Oberviechtach	49.4406	12.3763	16000	13476	NO	84.225	0	0	0	488.505	2931.03	DE23	C
DE	DE239	DEAG_BYWEN-K0207	DETP_BYWEN-K0207	Nabburg	49.4343	12.1695	12500	9317	NO	58.2312	0	0	0	337.741	2026.45	DE23	C
DE	DE239	DEAG_BYWEN-K0223	DETP_BYWEN-K0223	Burglengenfeld	49.2006	12.0191	16300	14446	NO	90.2875	0	0	0	523.668	3142.01	DE23	B
DE	DE239	DEAG_BYWEN-K0224	DETP_BYWEN-K0224	ZV Maxhütte - Haidhof -Teublitz	49.2186	12.0617	19800	13116	NO	81.975	0	0	0	475.455	2852.73	DE23	B
DE	DE239	DEAG_BYWEN-K0225	DETP_BYWEN-K0225	Schwarzenfeld	49.3696	12.1169	20000	7811	NO	48.8188	0	0	0	283.149	1698.89	DE23	C
DE	DE239	DEAG_BYWEN-K0226	DETP_BYWEN-K0226	ZV Schwandorf - Wackersdorf	49.3022	12.1092	125000	63352	YES	395.95	1267.04	950.28	1900.56	2296.51	13779.1	DE23	B
DE	DE239	DEAG_BYWEN-K0244	DETP_BYWEN-K0244	Pfreimd	49.4787	12.1775	13500	2477	NO	15.4813	0	0	0	89.7912	538.747	DE23	B
DE	DE239	DEAG_BYWEN-K0248	DETP_BYWEN-K0248	Wernberg - Köblitz	49.5269	12.1668	11500	7399	NO	46.2438	0	0	0	268.214	1609.28	DE23	B
DE	DE216	DEAG_BYWM-K0002	DETP_BYWM-K0002	Bad Tölz	47.7784	11.5422	49000	44000	YES	275	880	660	1320	1595	9570	DE21	C
DE	DE216	DEAG_BYWM-K0003	DETP_BYWM-K0003	Kochel/See	47.6629	11.3599	8400	7500	NO	46.875	0	0	0	271.875	1631.25	DE21	A
DE	DE216	DEAG_BYWM-K0004	DETP_BYWM-K0004	Lenggries	47.6976	11.5642	20000	14000	NO	87.5	0	0	0	507.5	3045	DE21	B
DE	DE216	DEAG_BYWM-K0007	DETP_BYWM-K0007	Benediktbeuern/Bichl	47.7207	11.3963	14500	6900	NO	43.125	0	0	0	250.125	1500.75	DE21	C
DE	DE80M	DEAG_MV58.50.3 wbu706	DETP_MV58.50.3 wbu706	Kirchdorf	53.9957	11.4463	10000	4978	NO	31.1125	0	0	0	180.452	1082.71	DE80	B
DE	DE80M	DEAG_MV58.65.1 wbu664	DETP_MV58.65.1 wbu664	Lüdersdorf	53.828	10.779	13000	11794	NO	73.7125	0	0	0	427.533	2565.2	DE80	C
DE	DE80M	DEAG_MV58.71.1 wbu585	DETP_MV58.71.1 wbu585	Mühlen Eichsen	53.7663	11.2473	5000	2846	NO	17.7875	0	0	0	103.168	619.005	DE80	C
DE	DE80M	DEAG_MV58.74.1 wbu1348	DETP_MV58.74.1 wbu1348	Neukloster	53.844	11.6711	7900	6226	NO	38.9125	0	0	0	225.692	1354.15	DE80	C
DE	DE80N	DEAG_MV59.02.1 wbu2387	DETP_MV59.02.1 wbu2387	Anklam	53.8609	13.7233	50000	21969	YES	137.306	439.38	329.535	659.07	796.376	4778.26	DE80	B
DE	DE80N	DEAG_MV59.101.1 wbu2073	DETP_MV59.101.1 wbu2073	Wolgast	54.0607	13.7328	40000	22789	YES	142.431	455.78	341.835	683.67	826.101	4956.61	DE80	C
DE	DE80N	DEAG_MV59.107.2 wbu1050	DETP_MV59.107.2 wbu1050	Zinnowitz	54.0546	13.9135	20000	13977	NO	87.3563	0	0	0	506.666	3040	DE80	C
DE	DE216	DEAG_BYWM-K0015	DETP_BYWM-K0015	AV Isar-Loisachgruppe Sitz Wolfratshausen	47.9263	11.4292	120000	92000	YES	575	1840	1380	2760	3335	20010	DE21	B
DE	DE216	DEAG_BYWM-K0016	DETP_BYWM-K0016	Eurasburg	47.861	11.4159	9333	5700	NO	35.625	0	0	0	206.625	1239.75	DE21	B
DE	DE21D	DEAG_BYWM-K0029	DETP_BYWM-K0029	Oberammergau	47.605	11.0583	15500	8100	NO	50.625	0	0	0	293.625	1761.75	DE21	A
DE	DE21D	DEAG_BYWM-K0032	DETP_BYWM-K0032	Bad Kohlgrub	47.6646	11.081	8000	3500	NO	21.875	0	0	0	126.875	761.25	DE21	C
DE	DE21D	DEAG_BYWM-K0045	DETP_BYWM-K0045	Ohlstadt	47.6349	11.2144	6000	4230	NO	26.4375	0	0	0	153.337	920.025	DE21	B
DE	DE21D	DEAG_BYWM-K0048	DETP_BYWM-K0048	Garmisch-Partenkirchen	47.51	11.0985	73300	49000	YES	306.25	980	735	1470	1776.25	10657.5	DE21	A
DE	DE21D	DEAG_BYWM-K0051	DETP_BYWM-K0051	Murnau/Staffelsee	47.6674	11.2236	50000	24000	YES	150	480	360	720	870	5220	DE21	B
DE	DE21D	DEAG_BYWM-K0054	DETP_BYWM-K0054	Oberes Isartal - Mittenwald	47.4695	11.2792	43000	22000	YES	137.5	440	330	660	797.5	4785	DE21	C
DE	DE21E	DEAG_BYWM-K0058	DETP_BYWM-K0058	Landsberg/Lech	48.0666	10.8748	64000	46000	YES	287.5	920	690	1380	1667.5	10005	DE21	A
DE	DE21E	DEAG_BYWM-K0059	DETP_BYWM-K0059	ZV Geltendorf-Eresing Sitz Geltendorf	48.162	10.9803	9500	13500	NO	84.375	0	0	0	489.375	2936.25	DE21	C
DE	DE21E	DEAG_BYWM-K0062	DETP_BYWM-K0062	Abwasserzweckverband Penzing-Weil Sitz Penzing	48.1282	10.9382	12000	7100	NO	44.375	0	0	0	257.375	1544.25	DE21	C
DE	DE21E	DEAG_BYWM-K0063	DETP_BYWM-K0063	Ammerseewerke gKU	48.0804	11.1235	90000	92000	YES	575	1840	1380	2760	3335	20010	DE21	A
DE	DE21N	DEAG_BYWM-K0066	DETP_BYWM-K0066	Schongau	47.816	10.9167	40000	23500	YES	146.875	470	352.5	705	851.875	5111.25	DE21	B
DE	DE21N	DEAG_BYWM-K0068	DETP_BYWM-K0068	Peißenberg	47.784	11.0795	27000	13000	NO	81.25	0	0	0	471.25	2827.5	DE21	A
DE	DE21N	DEAG_BYWM-K0074	DETP_BYWM-K0074	Peiting	47.8228	10.9311	25000	16000	NO	100	0	0	0	580	3480	DE21	B
DE	DE21N	DEAG_BYWM-K0080	DETP_BYWM-K0080	Verbandskläranlage Penzberg GmbH	47.7559	11.3996	38500	20500	NO	128.125	0	0	0	743.125	4458.75	DE21	C
DE	DE21N	DEAG_BYWM-K0081	DETP_BYWM-K0081	Weilheim/Ob	47.853	11.1434	40000	34000	YES	212.5	680	510	1020	1232.5	7395	DE21	A
DE	DE21E	DEAG_BYWM-K0084	DETP_BYWM-K0084	Kaufering	48.11	10.8576	18500	13500	NO	84.375	0	0	0	489.375	2936.25	DE21	C
DE	DE21N	DEAG_BYWM-K0088	DETP_BYWM-K0088	ZV Hungerbachtal	47.779	11.111	7000	5300	NO	33.125	0	0	0	192.125	1152.75	DE21	C
DE	DE21L	DEAG_BYWM-K0097	DETP_BYWM-K0097	AV Starnberger See Sitz Starnberg	48.015	11.3565	100000	46000	YES	287.5	920	690	1380	1667.5	10005	DE21	B
DE	DED52	DEAG_SN3362	DETP_SN33	Bad Lausick	51.1455	12.626	9500	7455	NO	46.5938	0	0	0	270.244	1621.46	DED5	A
DE	DED44		DETP_SN4001	KA Adorf	50.3396	12.251	15000	15798	NO	98.7375	0	0	0	572.678	3436.07	DED4	C
DE	DED45	DEAG_SN4011	DETP_SN4022	ZKA Crimmitschau	50.8371	12.3953	28000	36200	NO	226.25	0	0	0	1312.25	7873.5	DED4	A
DE	DED45	DEAG_SN4121	DETP_SN4025	KA Cunersdorf	50.6523	12.5238	13500	14800	NO	92.5	0	0	0	536.5	3219	DED4	C
DE	DED45	DEAG_SN4120	DETP_SN4037	KA Niederopritz	50.6496	12.6404	9000	4367	NO	27.2938	0	0	0	158.304	949.823	DED4	C
DE	DED52		DETP_SN404	Kleindalzig	51.2028	12.3047	24000	23607	NO	147.544	0	0	0	855.754	5134.52	DED5	C
DE	DED44	DEAG_SN4111	DETP_SN4047	ZKA Klingenthal	50.3468	12.4822	11500	7455	NO	46.5938	0	0	0	270.244	1621.46	CZ04	C
DE	DE300	DEAG_BE01	DETP_BE01	Ruhleben	52.5316	13.2317	1600000	1901188	NO	11882.4	0	0	0	68918.1	413508	DE30	A
DE	DE40E	DEAG_BB10	DETP_BB10	Beelitz	52.2296	12.981	30000	16510	NO	103.188	0	0	0	598.487	3590.92	DE40	A
DE	DE407	DEAG_BB105	DETP_BB105	Herzberg	51.7112	13.2208	25000	9647	NO	60.2937	0	0	0	349.704	2098.22	DE40	C
DE	DE40E	DEAG_BB118	DETP_BB118	Jeserig	52.401	12.6747	16000	11146	NO	69.6625	0	0	0	404.043	2424.26	DE40	C
DE	DE40C	DEAG_BB12	DETP_BB12	Beeskow	52.1955	14.2576	15500	11408	NO	71.3	0	0	0	413.54	2481.24	DE40	A
DE	DE405	DEAG_BB120	DETP_BB120	Joachimsthal	52.962	13.7739	15000	5016	NO	31.35	0	0	0	181.83	1090.98	DE40	C
DE	DE40H	DEAG_BB121	DETP_BB121	Jüterbog	52.0004	13.1014	29000	18759	NO	117.244	0	0	0	680.014	4080.08	DE40	B
DE	DE40F	DEAG_BB123	DETP_BB123	Karstädt	53.1564	11.7264	10000	3190	NO	19.9375	0	0	0	115.637	693.825	DE40	C
DE	DE406	DEAG_BB124	DETP_BB124	Kasel-Golzig	51.9265	13.7138	48000	14964	YES	93.525	299.28	224.46	448.92	542.445	3254.67	DE40	C
DE	DE40E	DEAG_BB126	DETP_BB126	Werder OT Kemnitz	52.415	12.9031	38000	27557	YES	172.231	551.14	413.355	826.71	998.941	5993.65	DE40	A
DE	DE40E	DEAG_BB13	DETP_BB13	Belzig	52.1463	12.604	10000	9216	NO	57.6	0	0	0	334.08	2004.48	DE40	A
DE	DE40A	DEAG_BB137	DETP_BB137	Kremmen	52.7608	13.06	14400	11583	NO	72.3937	0	0	0	419.884	2519.3	DE40	C
DE	DE40B	DEAG_BB146	DETP_BB146	Lauchhammer	51.4648	13.7544	27000	16285	NO	101.781	0	0	0	590.331	3541.99	DE40	B
DE	DE40E	DEAG_BB147	DETP_BB147	Lehnin	52.3216	12.7239	30000	4478	NO	27.9875	0	0	0	162.327	973.965	DE40	B
DE	DE40F	DEAG_BB149	DETP_BB149	Lenzen	53.0934	11.4615	5632	1830	NO	11.4375	0	0	0	66.3375	398.025	DE40	B
DE	DE40A	DEAG_BB154	DETP_BB154	Liebenwalde	52.8457	13.4008	14100	18605	NO	116.281	0	0	0	674.431	4046.59	DE40	C
DE	DE406	DEAG_BB159	DETP_BB159	Lübben	51.9431	13.9267	50000	13894	YES	86.8375	277.88	208.41	416.82	503.657	3021.94	DE40	A
DE	DE40B	DEAG_BB160	DETP_BB160	Lübbenau/Spreewald	51.8687	13.9321	26000	13774	NO	86.0875	0	0	0	499.307	2995.84	DE40	B
DE	DE40H	DEAG_BB162	DETP_BB162	Luckenwalde	52.1103	13.1559	40000	26821	YES	167.631	536.42	402.315	804.63	972.261	5833.57	DE40	B
DE	DE40H	DEAG_BB163	DETP_BB163	Ludwigsfelde	52.2956	13.2784	48000	27020	YES	168.875	540.4	405.3	810.6	979.475	5876.85	DE40	A
DE	DE405	DEAG_BB165	DETP_BB165	Lunow	52.906	14.1319	7000	4231	NO	26.4437	0	0	0	153.374	920.242	DE40	C
DE	DE40I	DEAG_BB166	DETP_BB166	Lychen	53.1962	13.3225	8000	3139	NO	19.6188	0	0	0	113.789	682.733	DE40	A
DE	DE409	DEAG_BB169	DETP_BB169	Manschnow	52.5596	14.5756	15000	6132	NO	38.325	0	0	0	222.285	1333.71	DE40	C
DE	DE409	DEAG_BB176	DETP_BB176	Münchehofe	52.4886	13.6588	279300	157266	YES	982.913	3145.32	2358.99	4717.98	5700.89	34205.4	DE40	A
DE	DE408	DEAG_BB177	DETP_BB177	Nauen	52.6367	12.8757	21500	15754	NO	98.4625	0	0	0	571.082	3426.49	DE40	A
DE	DE408	DEAG_BB179	DETP_BB179	Nennhausen	52.6017	12.5387	5000	3497	NO	21.8562	0	0	0	126.766	760.597	DE40	C
DE	DE40D	DEAG_BB182	DETP_BB182	Neuruppin	52.9507	12.8153	44000	31232	YES	195.2	624.64	468.48	936.96	1132.16	6792.96	DE40	B
DE	DE40D	DEAG_BB186	DETP_BB186	Neustadt (Dosse)	52.87	12.4708	30000	21373	NO	133.581	0	0	0	774.771	4648.63	DE40	A
DE	DE40G	DEAG_BB192	DETP_BB192	Peitz	51.8499	14.4138	12000	9455	NO	59.0938	0	0	0	342.744	2056.46	DE40	A
DE	DE40F	DEAG_BB193	DETP_BB193	Perleberg	53.0575	11.8503	80000	12546	YES	78.4125	250.92	188.19	376.38	454.793	2728.76	DE40	C
DE	DED44	DEAG_SN4114	DETP_SN4050	KA Kürbitz	50.4667	12.0737	7000	5088	NO	31.8	0	0	0	184.44	1106.64	DED4	B
DE	DED44	DEAG_SN4112	DETP_SN4053	KA Lengenfeld	50.578	12.3522	6200	7594	NO	47.4625	0	0	0	275.283	1651.7	DED4	A
DE	DED44	DEAG_SN4009	DETP_SN4065	KA Oelsnitz	50.4179	12.15	15000	13458	NO	84.1125	0	0	0	487.852	2927.11	DED4	A
DE	DED44	DEAG_SN4001	DETP_SN4070	ZKA Plauen	50.5251	12.1691	140000	112658	YES	704.113	2253.16	1689.87	3379.74	4083.85	24503.1	DED4	C
DE	DED44	DEAG_SN4003	DETP_SN4079	ZKA Reichenbach	50.6284	12.2387	39000	24397	YES	152.481	487.94	365.955	731.91	884.391	5306.35	DED4	C
DE	DED44		DETP_SN4081	ZKA Rodewisch	50.5506	12.3843	60000	65000	YES	406.25	1300	975	1950	2356.25	14137.5	DED4	B
DE	DED44	DEAG_SN4117	DETP_SN4083	KA Rothenkirchen	50.5487	12.5147	8000	5163	NO	32.2688	0	0	0	187.159	1122.95	DED4	B
DE	DED42		DETP_SN4084	ZKA Schlematal	50.6178	12.6841	73500	58781	YES	367.381	1175.62	881.715	1763.43	2130.81	12784.9	DED4	B
DE	DED44	DEAG_SN4116	DETP_SN4089	KA Schöneck	50.3806	12.3261	5400	4062	NO	25.3875	0	0	0	147.248	883.485	DED4	C
DE	DED42		DETP_SN4092	ZKA Schwarzenberg	50.5551	12.7673	37700	30049	NO	187.806	0	0	0	1089.28	6535.66	DED4	A
DE	DED44	DEAG_SN4008	DETP_SN4098	ZKA Treuen	50.5254	12.284	15000	12241	NO	76.5063	0	0	0	443.736	2662.42	DED4	C
DE	DED45		DETP_SN4107	ZKA Werdau	50.7478	12.3771	48000	52250	YES	326.562	1045	783.75	1567.5	1894.06	11364.4	DED4	A
DE	DED42		DETP_SN4109	ZKA Wolfsgrün	50.5221	12.6103	16600	13426	NO	83.9125	0	0	0	486.692	2920.15	DED4	C
DE	DED45		DETP_SN4112	ZKA Zwickau	50.7693	12.4815	143000	135654	YES	847.838	2713.08	2034.81	4069.62	4917.46	29504.7	DED4	B
DE	DED44	DEAG_SN4110	DETP_SN4125	ZKA Elsterberg (komm)	50.6051	12.1609	6000	3125	NO	19.5312	0	0	0	113.281	679.688	DED4	A
DE	DED2F	DEAG_SN5056	DETP_SN415	Königstein	50.9206	14.0668	6000	5905	NO	36.9062	0	0	0	214.056	1284.34	DED2	A
DE	DE404	DEAG_BB200	DETP_BB200	Potsdam-Nord	52.4372	13.0262	90000	73254	YES	457.838	1465.08	1098.81	2197.62	2655.46	15932.7	DE40	A
DE	DE40I	DEAG_BB207	DETP_BB207	Prenzlau	53.3237	13.8531	80000	24648	YES	154.05	492.96	369.72	739.44	893.49	5360.94	DE40	A
DE	DE40F	DEAG_BB209	DETP_BB209	Pritzwalk/Schönhagen	53.1663	12.1436	30000	12981	NO	81.1313	0	0	0	470.561	2823.37	DE40	B
DE	DE408	DEAG_BB211	DETP_BB211	Rathenow	52.6281	12.3303	40000	36654	YES	229.088	733.08	549.81	1099.62	1328.71	7972.24	DE40	C
DE	DE408	DEAG_BB215	DETP_BB215	Roskow	52.4784	12.7449	36000	31946	NO	199.663	0	0	0	1158.04	6948.26	DE40	C
DE	DE404	DEAG_BB219	DETP_BB219	Satzkorn	52.4641	12.9882	10000	8668	NO	54.175	0	0	0	314.215	1885.29	DE40	C
DE	DE401	DEAG_BB22	DETP_BB22	Brandenburg - Briest	52.4179	12.4365	99000	81618	YES	510.113	1632.36	1224.27	2448.54	2958.65	17751.9	DE40	C
DE	DE40A	DEAG_BB227	DETP_BB227	Schönermark OHV	53.0209	13.1146	42000	21073	YES	131.706	421.46	316.095	632.19	763.896	4583.38	DE40	C
DE	DE407	DEAG_BB229	DETP_BB229	Schönewalde	51.8078	13.2145	8000	2960	NO	18.5	0	0	0	107.3	643.8	DE40	B
DE	DE40I	DEAG_BB231	DETP_BB231	Schwedt	53.0549	14.2543	65000	33029	YES	206.431	660.58	495.435	990.87	1197.3	7183.81	DE40	A
DE	DE409	DEAG_BB232	DETP_BB232	Seelow	52.543	14.3959	17500	9947	NO	62.1687	0	0	0	360.579	2163.47	DE40	A
DE	DE40G	DEAG_BB238	DETP_BB238	Spremberg-Nord	51.5783	14.3721	50000	17639	YES	110.244	352.78	264.585	529.17	639.414	3836.48	DE40	A
DE	DE40E	DEAG_BB239	DETP_BB239	Stahnsdorf	52.377	13.2482	430000	188253	YES	1176.58	3765.06	2823.8	5647.59	6824.17	40945	DE40	A
DE	DE40B	DEAG_BB24	DETP_BB24	Brieske/Senftenberg	51.4939	13.9637	60000	25079	YES	156.744	501.58	376.185	752.37	909.114	5454.68	DE40	A
DE	DE40C	DEAG_BB243	DETP_BB243	Storkow	52.2789	13.9486	32900	21266	YES	132.912	425.32	318.99	637.98	770.892	4625.35	DE40	C
DE	DE406	DEAG_BB244	DETP_BB244	Straupitz	51.9106	14.1031	7150	3400	NO	21.25	0	0	0	123.25	739.5	DE40	C
DE	DE40E	DEAG_BB25	DETP_BB25	Brück Hackenhausen	52.2157	12.7408	16000	11155	NO	69.7188	0	0	0	404.369	2426.21	DE40	C
DE	DE40I	DEAG_BB250	DETP_BB250	Templin	53.087	13.4734	22000	15340	NO	95.875	0	0	0	556.075	3336.45	DE40	C
DE	DE40C	DEAG_BB254	DETP_BB254	Trebatsch	52.1015	14.182	8000	2853	NO	17.8313	0	0	0	103.421	620.527	DE40	C
DE	DE40H	DEAG_BB255	DETP_BB255	Trebbin	52.2248	13.2403	10000	5992	NO	37.45	0	0	0	217.21	1303.26	DE40	B
DE	DE40E	DEAG_BB256	DETP_BB256	Treuenbrietzen	52.1082	12.8745	10000	8893	NO	55.5813	0	0	0	322.371	1934.23	DE40	B
DE	DE407	DEAG_BB257	DETP_BB257	Uebigau	51.6084	13.3047	17000	7980	NO	49.875	0	0	0	289.275	1735.65	DE40	C
DE	DE40B	DEAG_BB259	DETP_BB259	Vetschau	51.7974	14.073	18000	6131	NO	38.3188	0	0	0	222.249	1333.49	DE40	B
DE	DE408	DEAG_BB261	DETP_BB261	Wagenitz	52.6657	12.6383	6000	5035	NO	31.4688	0	0	0	182.519	1095.11	DE40	C
DE	DE408	DEAG_BB266	DETP_BB266	Wansdorf	52.6178	13.092	270000	179672	YES	1122.95	3593.44	2695.08	5390.16	6513.11	39078.7	DE40	C
DE	DE40G	DEAG_BB27	DETP_BB27	Burg	51.8239	14.1608	12000	10745	NO	67.1562	0	0	0	389.506	2337.04	DE40	C
DE	DE40D	DEAG_BB272	DETP_BB272	Werder	52.9123	12.7009	5000	2772	NO	17.325	0	0	0	100.485	602.91	DE40	A
DE	DE405	DEAG_BB273	DETP_BB273	Werneuchen	52.6188	13.7326	15000	10824	NO	67.65	0	0	0	392.37	2354.22	DE40	C
DE	DE40E	DEAG_BB276	DETP_BB276	Wiesenburg/Mark	52.1047	12.4494	6000	3935	NO	24.5938	0	0	0	142.644	855.862	DE40	C
DE	DE407	DEAG_BB279	DETP_BB279	Winkel	51.5453	13.4004	5000	3212	NO	20.075	0	0	0	116.435	698.61	DE40	C
DE	DE40F	DEAG_BB280	DETP_BB280	Wittenberge	53.0248	11.6993	45000	19218	YES	120.113	384.36	288.27	576.54	696.653	4179.91	DE40	C
DE	DE40D	DEAG_BB282	DETP_BB282	Wittstock/Dosse	53.1413	12.4773	25000	14438	NO	90.2375	0	0	0	523.377	3140.26	DE40	A
DE	DE409	DEAG_BB286	DETP_BB286	Wriezen	52.724	14.1472	36000	24218	NO	151.363	0	0	0	877.903	5267.41	DE40	A
DE	DE40B	DEAG_BB29	DETP_BB29	Calau	51.7475	13.9739	8000	5153	NO	32.2063	0	0	0	186.796	1120.78	DE40	A
DE	DE40A	DEAG_BB292	DETP_BB292	Zehdenick	52.967	13.3655	15000	12018	NO	75.1125	0	0	0	435.652	2613.91	DE40	C
DE	DE40E	DEAG_BB293	DETP_BB293	Ziesar	52.2815	12.3061	6750	4338	NO	27.1125	0	0	0	157.252	943.515	DE40	C
DE	DE409	DEAG_BB3	DETP_BB3	Altfriedland	52.6572	14.2007	22500	18506	NO	115.663	0	0	0	670.842	4025.05	DE40	C
DE	DE402	DEAG_BB30	DETP_BB30	Cottbus	51.7734	14.3512	200000	106060	YES	662.875	2121.2	1590.9	3181.8	3844.67	23068	DE40	A
DE	DE407	DEAG_BB319	DETP_BB319	Großthiemig	51.3886	13.6922	6000	5573	NO	34.8313	0	0	0	202.021	1212.13	DE40	C
DE	DE80K	DEAG_MV51.04.1	DETP_MV51.04.1	Bad Doberan	54.1156	11.925	60000	60443	YES	377.769	1208.86	906.645	1813.29	2191.06	13146.4	DE80	B
DE	DE80K	DEAG_MV51.41.1 wbu459	DETP_MV51.41.1 wbu459	Kröpelin (neu)	54.0636	11.7786	10000	8539	NO	53.3688	0	0	0	309.539	1857.23	DE80	A
DE	DE80K	DEAG_MV51.47.1 wbu891	DETP_MV51.47.1 wbu891	Neubukow	54.0296	11.6781	6000	5797	NO	36.2313	0	0	0	210.141	1260.85	DE80	A
DE	DE80K	DEAG_MV51.71.1 wbu190	DETP_MV51.71.1 wbu190	Schwaan	53.9495	12.1099	13000	13244	NO	82.775	0	0	0	480.095	2880.57	DE80	B
DE	DE80J	DEAG_MV52.03.1 wbu144	DETP_MV52.03.1 wbu144	Altentreptow	53.6814	13.2537	9200	2456	NO	15.35	0	0	0	89.03	534.18	DE80	B
[truncated: 1,316 more rows]

## Sheet: Meta
Field name	Field definition	Source	Note
rptMStateKey	Member State abbreviation	EEA, 2019
uwwNuts	internal numerical database code of Region (NUTS)	EEA, 2019
aggCode	internal numerical database code of agglomeration	EEA, 2019
uwwCode	ID of UWWTP / collecting system without treatment	EEA, 2019
uwwName	Name of UWWTP / collecting system without treatment	EEA, 2019
uwwLatitude	Latitude (ETRS89, decimal degrees)	EEA, 2019
uwwLongitude	Longitude (ETRS89, decimal degrees)	EEA, 2019
uwwCapacity	Organic design capacity (p.e.)	EEA, 2019
uwwLoadEntering	Load entering UWWTP (p.e.)	EEA, 2019
anaerobic digestion [y/n]	anaerobic sludge stabilization	expert judgement	yes / no
inflow [m³/h]	wastewater inflow	own calculation
digester gas [m³/d]	digester gas	own calculation
digester gas el. [MWh/a]	electric energy from digester gas combustion	own calculation
digester gas th. [MWh/a]	thermal energy from digester gas combustion	own calculation
heat recovery potential [kW]	wastewater heat recovery potential	own calculation
heat pump [MWh/a]	thermal energy from wastewater provided by heat pump	own calculation
NUTS_ID	internal numerical database code of Region (NUTS)	EC, Eurostat, GISCO, 2018
spatial context	spatial context of the WWTP	own calculation	A = within the settlement, B = near to settlement, C = far from the settlement

## Sheet: Assumptions
Assumptions	Value	Source	Note
wastewater flow [l/PE*d]	150	own estimation
digester gas production [l/PE*d]	20	Lindtner, 2008	in the range ov 15-22 l/PE*d
electric energy from digester gas [kWh/PE*a]	15	Lindtner, 2008	in the range of 10-20 kWh/PE*a
thermal energy from digester gas [kWh/PE*a]	30	Lindtner, 2008	in the range of 20-40 kWh/PE*a
heat capacity (waste)water [kWh/m³*K]	1.16
wastewater temperature reduction heat exchanger [K]	5	own estimation
COP heat pump [-]	4	own estimation
heat pump operating hours [h/a]	4500	Neugebauer et al. 2015
